# Supplementary material for: Historical Selection, Adaptation Signatures, and Ambiguity of Introgressions in Wheat
Source: MDPI journal article supplement (doi:10.3390/ijms24098390), 2023-05-07
Supplement: s1 [file s1]

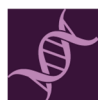

Article

# Historical Selection, Adaptation Signatures, and Ambiguity of Introgressions in Wheat

Demissew Sertse<sup>1\*</sup>; Frank You<sup>2</sup>; Valentyna Klymiuk<sup>3</sup>; Jemanesh K. Haile<sup>3</sup>; Amidou N'Diaye<sup>3</sup>; Curtis J. Pozniak<sup>3</sup>; Sylvie Cloutier<sup>2</sup>; Sateesh Kagale<sup>1\*</sup>

<sup>1</sup> Aquatic and Crop Resource Development, National Research Council Canada, Saskatoon, Saskatchewan, Canada

<sup>2</sup> Ottawa Research and Development Centre, Agriculture and Agri-Food Canada, Ottawa, Ontario, Canada; frank.you@agr.gc.ca (F.M.Y.); sylvie.cloutier@agr.gc.ca (S.C.)

<sup>3</sup> Crop Development Centre, University of Saskatchewan, Saskatoon, Saskatchewan, Canada; valentyna.klymiuk@usask.ca (V.K.); jemanesh.haile@usask.ca (J.K.H.); amidou.ndiaye@usask.ca (A.N.); curtis.pozniak@usask.ca (C.J.P.)

\* Correspondence: dmsertse@gmail.com (D.S.); Sateesh.Kagale@nrc-cnrc.gc.ca (S.K.)

**Table S1.** The list of accessions in main (n=921 of the exome data set and ancestral coefficient of each accession based on ancestral population defined at K=8.

| Accessions      | Q1     | Q2     | Q3     | Q4     | Q5     | Q6     | Q7     | Q8     | Subpop |
|-----------------|--------|--------|--------|--------|--------|--------|--------|--------|--------|
| AUS_DAS5-000894 | 0.9999 | 0.0000 | 0.0000 | 0.0000 | 0.0000 | 0.0000 | 0.0000 | 0.0000 | AUS    |
| AUS_DAS5-000826 | 0.9500 | 0.0000 | 0.0000 | 0.0000 | 0.0000 | 0.0500 | 0.0000 | 0.0000 | AUS    |
| AUS_DAS5-000719 | 0.9492 | 0.0000 | 0.0000 | 0.0000 | 0.0000 | 0.0508 | 0.0000 | 0.0000 | AUS    |
| AUS_DAS5-000588 | 0.9310 | 0.0090 | 0.0000 | 0.0000 | 0.0000 | 0.0600 | 0.0000 | 0.0000 | AUS    |
| AUS_DAS5-000820 | 0.9040 | 0.0000 | 0.0000 | 0.0000 | 0.0000 | 0.0960 | 0.0000 | 0.0000 | AUS    |
| AUS_DAS5-000668 | 0.8886 | 0.0125 | 0.0000 | 0.0000 | 0.0000 | 0.0989 | 0.0000 | 0.0000 | AUS    |
| AUS_DAS5-000929 | 0.8855 | 0.0000 | 0.0000 | 0.0000 | 0.0042 | 0.1103 | 0.0000 | 0.0000 | AUS    |
| AUS_DAS5-000574 | 0.8630 | 0.0000 | 0.0000 | 0.0709 | 0.0000 | 0.0661 | 0.0000 | 0.0000 | AUS    |
| AUS_DAS5-000713 | 0.8398 | 0.0000 | 0.0000 | 0.0000 | 0.0000 | 0.1601 | 0.0000 | 0.0000 | AUS    |
| AUS_DAS5-000816 | 0.8226 | 0.0000 | 0.0000 | 0.0892 | 0.0000 | 0.0882 | 0.0000 | 0.0000 | AUS    |
| AUS_DAS5-000916 | 0.8095 | 0.0276 | 0.0000 | 0.0000 | 0.0000 | 0.0553 | 0.1076 | 0.0000 | AUS    |
| AUS_DAS5-000824 | 0.8067 | 0.0000 | 0.0000 | 0.0000 | 0.0000 | 0.1932 | 0.0000 | 0.0000 | AUS    |
| AUS_DAS5-000821 | 0.8053 | 0.0000 | 0.0000 | 0.0000 | 0.0000 | 0.1946 | 0.0000 | 0.0000 | AUS    |
| AUS_DAS5-000734 | 0.7892 | 0.0000 | 0.0000 | 0.0000 | 0.0000 | 0.2107 | 0.0000 | 0.0000 | AUS    |
| AUS_DAS5-000642 | 0.7860 | 0.0000 | 0.0000 | 0.0000 | 0.0000 | 0.2140 | 0.0000 | 0.0000 | AUS    |
| AUS_DAS5-000793 | 0.7413 | 0.0000 | 0.0000 | 0.0000 | 0.0000 | 0.1518 | 0.0872 | 0.0196 | AUS    |
| AUS_DAS5-000759 | 0.7304 | 0.0793 | 0.0000 | 0.0000 | 0.0000 | 0.1850 | 0.0000 | 0.0053 | AUS    |
| AUS_DAS5-000875 | 0.7127 | 0.0267 | 0.0000 | 0.0000 | 0.0000 | 0.2606 | 0.0000 | 0.0000 | AUS    |
| AUS_DAS5-000667 | 0.7049 | 0.0000 | 0.0000 | 0.0000 | 0.0000 | 0.2950 | 0.0000 | 0.0000 | AUS    |
| AUS_DAS5-000996 | 0.6931 | 0.0170 | 0.0000 | 0.0745 | 0.0000 | 0.1452 | 0.0000 | 0.0702 | AUS    |
| AUS_DAS5-000887 | 0.6832 | 0.0000 | 0.0000 | 0.0000 | 0.0000 | 0.3167 | 0.0000 | 0.0000 | AUS    |
| AUS_DAS5-SUNCO  | 0.6794 | 0.0000 | 0.0000 | 0.1782 | 0.1424 | 0.0000 | 0.0000 | 0.0000 | AUS    |
| AUS_DAS5-000643 | 0.6787 | 0.0139 | 0.0000 | 0.0000 | 0.0000 | 0.3074 | 0.0000 | 0.0000 | AUS    |
| AUS_DAS5-000146 | 0.6695 | 0.0000 | 0.0000 | 0.1014 | 0.0082 | 0.1928 | 0.0211 | 0.0070 | AUS    |
| AUS_DAS5-000545 | 0.6574 | 0.0000 | 0.0000 | 0.0255 | 0.0622 | 0.2548 | 0.0000 | 0.0000 | AUS    |

| Accessions          | Q1     | Q2     | Q3     | Q4     | Q5     | Q6     | Q7     | Q8     | Subpop |
|---------------------|--------|--------|--------|--------|--------|--------|--------|--------|--------|
| AUS_DAS5-000232     | 0.6534 | 0.0000 | 0.0329 | 0.0968 | 0.0000 | 0.2168 | 0.0000 | 0.0000 | AUS    |
| AUS_DAS5-000504     | 0.6422 | 0.0216 | 0.0000 | 0.0000 | 0.0000 | 0.3361 | 0.0000 | 0.0000 | AUS    |
| AUS_DAS5-000192     | 0.6415 | 0.0206 | 0.0000 | 0.0000 | 0.0000 | 0.3379 | 0.0000 | 0.0000 | AUS    |
| AUS_DAS5-000710     | 0.6383 | 0.0453 | 0.0000 | 0.1141 | 0.0088 | 0.1584 | 0.0000 | 0.0351 | AUS    |
| AUS_DAS5-000140     | 0.6257 | 0.0352 | 0.0000 | 0.0000 | 0.0000 | 0.3391 | 0.0000 | 0.0000 | AUS    |
| AUS_DAS5-000518     | 0.6195 | 0.0000 | 0.0000 | 0.0000 | 0.0000 | 0.3804 | 0.0000 | 0.0000 | AUS    |
| AUS_DAS5-000553     | 0.6124 | 0.0000 | 0.0000 | 0.0000 | 0.0000 | 0.3875 | 0.0000 | 0.0000 | AUS    |
| AUS_DAS5-LANG       | 0.6053 | 0.0000 | 0.0000 | 0.2538 | 0.1409 | 0.0000 | 0.0000 | 0.0000 | AUS    |
| AUS_DAS5-000058     | 0.6033 | 0.0000 | 0.0000 | 0.0000 | 0.0000 | 0.3966 | 0.0000 | 0.0000 | AUS    |
| AUS_DAS5-000205     | 0.5967 | 0.0000 | 0.0000 | 0.1465 | 0.0000 | 0.2568 | 0.0000 | 0.0000 | AUS    |
| AUS_DAS5-000156     | 0.5947 | 0.0469 | 0.0000 | 0.0000 | 0.0000 | 0.3584 | 0.0000 | 0.0000 | AUS    |
| AUS_DAS5-SUNGUARD   | 0.5889 | 0.0000 | 0.0000 | 0.2830 | 0.1281 | 0.0000 | 0.0000 | 0.0000 | AUS    |
| AUS_DAS5-000191     | 0.5842 | 0.0000 | 0.0000 | 0.0000 | 0.0000 | 0.4157 | 0.0000 | 0.0000 | AUS    |
| AUS_DAS5-000117     | 0.5738 | 0.0516 | 0.0000 | 0.0000 | 0.0000 | 0.3746 | 0.0000 | 0.0000 | AUS    |
| AUS_DAS5-000154     | 0.5700 | 0.0000 | 0.0000 | 0.0000 | 0.0000 | 0.4300 | 0.0000 | 0.0000 | AUS    |
| AUS_DAS5-000148     | 0.5649 | 0.0253 | 0.0000 | 0.1609 | 0.0000 | 0.2056 | 0.0433 | 0.0000 | AUS    |
| AUS_DAS5-000489     | 0.5629 | 0.0000 | 0.0099 | 0.0000 | 0.0000 | 0.4149 | 0.0000 | 0.0123 | AUS    |
| AUS_DAS5-002230     | 0.5620 | 0.0000 | 0.0000 | 0.4380 | 0.0000 | 0.0000 | 0.0000 | 0.0000 | AUS    |
| AUS_DAS5-000183     | 0.5568 | 0.0006 | 0.0000 | 0.0000 | 0.0000 | 0.4425 | 0.0000 | 0.0000 | AUS    |
| BRA_DAS5-001730     | 0.5482 | 0.0000 | 0.0000 | 0.4518 | 0.0000 | 0.0000 | 0.0000 | 0.0000 | AUS    |
| AUS_DAS5-000222     | 0.5437 | 0.0000 | 0.0000 | 0.1369 | 0.0694 | 0.2290 | 0.0015 | 0.0195 | AUS    |
| AUS_DAS5-DERRIMUT   | 0.5412 | 0.0000 | 0.0000 | 0.3133 | 0.1454 | 0.0000 | 0.0000 | 0.0000 | AUS    |
| AUS_DAS5-000007     | 0.5378 | 0.0346 | 0.0000 | 0.0000 | 0.0046 | 0.3982 | 0.0248 | 0.0000 | AUS    |
| AUS_DAS5-000533     | 0.5360 | 0.0306 | 0.0212 | 0.0567 | 0.0186 | 0.3369 | 0.0000 | 0.0000 | AUS    |
| AUS_DAS5-000102     | 0.5314 | 0.0000 | 0.0000 | 0.1496 | 0.0591 | 0.0425 | 0.1271 | 0.0903 | AUS    |
| AUS_DAS5-000638     | 0.5253 | 0.0000 | 0.0427 | 0.1414 | 0.0000 | 0.2906 | 0.0000 | 0.0000 | AUS    |
| AUS_DAS5-EGA-HUME   | 0.5242 | 0.0000 | 0.0000 | 0.4168 | 0.0589 | 0.0000 | 0.0000 | 0.0000 | AUS    |
| AUS_DAS5-000215     | 0.5173 | 0.0000 | 0.0000 | 0.0000 | 0.0000 | 0.4827 | 0.0000 | 0.0000 | AUS    |
| AUS_DAS5-000221     | 0.5150 | 0.0000 | 0.0000 | 0.1636 | 0.1024 | 0.1976 | 0.0213 | 0.0000 | AUS    |
| AUS_DAS5-000496     | 0.5072 | 0.0000 | 0.0000 | 0.0000 | 0.0000 | 0.4927 | 0.0000 | 0.0000 | AUS    |
| AUS_DAS5-000847     | 0.5021 | 0.0106 | 0.0000 | 0.3076 | 0.0000 | 0.1797 | 0.0000 | 0.0000 | AUS    |
| AUS_DAS5-000563     | 0.4981 | 0.0168 | 0.0000 | 0.0000 | 0.0000 | 0.4851 | 0.0000 | 0.0000 | AUS    |
| AUS_DAS5-000135     | 0.4934 | 0.0000 | 0.0000 | 0.0000 | 0.0000 | 0.4828 | 0.0000 | 0.0238 | AUS    |
| AUS_DAS5-STRZELECKI | 0.4865 | 0.0000 | 0.0000 | 0.4498 | 0.0448 | 0.0000 | 0.0189 | 0.0000 | AUS    |
| AUS_DAS5-000472     | 0.4798 | 0.0054 | 0.0223 | 0.0720 | 0.0000 | 0.4005 | 0.0077 | 0.0122 | AUS    |
| AUS_DAS5-003328     | 0.4692 | 0.0000 | 0.0000 | 0.3067 | 0.0000 | 0.0000 | 0.0484 | 0.1756 | AUS    |
| AUS_DAS5-003329     | 0.4608 | 0.0000 | 0.0000 | 0.3535 | 0.0000 | 0.0000 | 0.0000 | 0.1856 | AUS    |
| AUS_DAS5-GLADIUS    | 0.4571 | 0.0005 | 0.0000 | 0.4228 | 0.0869 | 0.0000 | 0.0002 | 0.0324 | AUS    |
| AUS_DAS5-000145     | 0.4541 | 0.0326 | 0.0000 | 0.1614 | 0.0690 | 0.2548 | 0.0281 | 0.0000 | AUS    |
| AUS_DAS5-000127     | 0.4388 | 0.0000 | 0.0000 | 0.0788 | 0.2588 | 0.2236 | 0.0000 | 0.0000 | AUS    |
| AUS_DAS5-000123     | 0.4212 | 0.0077 | 0.0000 | 0.1164 | 0.1261 | 0.3286 | 0.0000 | 0.0000 | AUS    |

| Accessions      | Q1     | Q2     | Q3     | Q4     | Q5     | Q6     | Q7     | Q8     | Subpop |
|-----------------|--------|--------|--------|--------|--------|--------|--------|--------|--------|
| AUS_DAS5-000478 | 0.3932 | 0.0588 | 0.0000 | 0.0321 | 0.0238 | 0.3212 | 0.0000 | 0.1708 | AUS    |
| AUS_DAS5-000225 | 0.3555 | 0.0216 | 0.0000 | 0.2776 | 0.0731 | 0.2722 | 0.0000 | 0.0000 | AUS    |
| AUS_DAS5-000402 | 0.3542 | 0.0000 | 0.0000 | 0.3436 | 0.0000 | 0.3021 | 0.0000 | 0.0000 | AUS    |
| MEX_WSC-1-8     | 0.0000 | 0.0896 | 0.0000 | 0.0000 | 0.0000 | 0.9103 | 0.0000 | 0.0000 | AUSb   |
| AUS_DAS5-000443 | 0.0000 | 0.0000 | 0.0000 | 0.1658 | 0.0000 | 0.8342 | 0.0000 | 0.0000 | AUSb   |
| MEX_DAS5-002249 | 0.0000 | 0.1725 | 0.0000 | 0.0000 | 0.0000 | 0.8274 | 0.0000 | 0.0000 | AUSb   |
| AUS_DAS5-000053 | 0.2351 | 0.0000 | 0.0000 | 0.0000 | 0.0000 | 0.7649 | 0.0000 | 0.0000 | AUSb   |
| AUS_DAS5-000551 | 0.0000 | 0.0000 | 0.0000 | 0.2489 | 0.0000 | 0.7510 | 0.0000 | 0.0000 | AUSb   |
| AUS_DAS5-000411 | 0.0000 | 0.0000 | 0.0000 | 0.2490 | 0.0000 | 0.7509 | 0.0000 | 0.0000 | AUSb   |
| AUS_DAS5-000041 | 0.0000 | 0.0384 | 0.0000 | 0.2232 | 0.0000 | 0.7384 | 0.0000 | 0.0000 | AUSb   |
| AUS_DAS5-000074 | 0.2581 | 0.0037 | 0.0000 | 0.0000 | 0.0000 | 0.7381 | 0.0000 | 0.0000 | AUSb   |
| AUS_DAS5-000310 | 0.0000 | 0.0160 | 0.0000 | 0.2538 | 0.0000 | 0.7301 | 0.0000 | 0.0000 | AUSb   |
| AUS_DAS5-000368 | 0.0000 | 0.0000 | 0.0000 | 0.2392 | 0.0234 | 0.7179 | 0.0001 | 0.0193 | AUSb   |
| AUS_DAS5-000071 | 0.2920 | 0.0000 | 0.0000 | 0.0000 | 0.0000 | 0.7079 | 0.0000 | 0.0000 | AUSb   |
| AUS_DAS5-000353 | 0.0000 | 0.0000 | 0.0133 | 0.3085 | 0.0000 | 0.6781 | 0.0000 | 0.0000 | AUSb   |
| AUS_DAS5-000260 | 0.0000 | 0.0015 | 0.0000 | 0.2599 | 0.0033 | 0.6704 | 0.0649 | 0.0000 | AUSb   |
| AUS_DAS5-000358 | 0.0000 | 0.0000 | 0.0000 | 0.3403 | 0.0000 | 0.6597 | 0.0000 | 0.0000 | AUSb   |
| AUS_DAS5-000373 | 0.0000 | 0.0000 | 0.0000 | 0.3437 | 0.0000 | 0.6563 | 0.0000 | 0.0000 | AUSb   |
| AUS_DAS5-000178 | 0.3510 | 0.0000 | 0.0000 | 0.0000 | 0.0000 | 0.6490 | 0.0000 | 0.0000 | AUSb   |
| AUS_DAS5-000442 | 0.0000 | 0.0000 | 0.0000 | 0.3811 | 0.0000 | 0.6188 | 0.0000 | 0.0000 | AUSb   |
| AUS_DAS5-000160 | 0.3371 | 0.0606 | 0.0000 | 0.0000 | 0.0000 | 0.6022 | 0.0000 | 0.0000 | AUSb   |
| AUS_DAS5-000424 | 0.0000 | 0.0000 | 0.0000 | 0.3290 | 0.0709 | 0.5931 | 0.0000 | 0.0070 | AUSb   |
| AUS_DAS5-000244 | 0.0905 | 0.0939 | 0.0000 | 0.2235 | 0.0000 | 0.5920 | 0.0000 | 0.0000 | AUSb   |
| AUS_DAS5-000462 | 0.3034 | 0.1056 | 0.0000 | 0.0000 | 0.0000 | 0.5910 | 0.0000 | 0.0000 | AUSb   |
| AUS_DAS5-000029 | 0.0000 | 0.0000 | 0.0427 | 0.3244 | 0.0000 | 0.5753 | 0.0499 | 0.0077 | AUSb   |
| AUS_DAS5-000055 | 0.3000 | 0.0000 | 0.0000 | 0.1275 | 0.0000 | 0.5724 | 0.0000 | 0.0000 | AUSb   |
| AUS_DAS5-000413 | 0.0000 | 0.0000 | 0.0000 | 0.4293 | 0.0000 | 0.5707 | 0.0000 | 0.0000 | AUSb   |
| AUS_DAS5-000524 | 0.4305 | 0.0000 | 0.0000 | 0.0000 | 0.0000 | 0.5695 | 0.0000 | 0.0000 | AUSb   |
| AUS_DAS5-000396 | 0.0000 | 0.0000 | 0.0000 | 0.4342 | 0.0000 | 0.5555 | 0.0103 | 0.0000 | AUSb   |
| AUS_DAS5-000562 | 0.4304 | 0.0186 | 0.0000 | 0.0000 | 0.0000 | 0.5510 | 0.0000 | 0.0000 | AUSb   |
| AUS_DAS5-000166 | 0.4593 | 0.0000 | 0.0000 | 0.0000 | 0.0000 | 0.5407 | 0.0000 | 0.0000 | AUSb   |
| AUS_DAS5-000430 | 0.0000 | 0.0000 | 0.0000 | 0.4692 | 0.0000 | 0.5308 | 0.0000 | 0.0000 | AUSb   |
| AUS_DAS5-000194 | 0.4719 | 0.0000 | 0.0000 | 0.0000 | 0.0000 | 0.5280 | 0.0000 | 0.0000 | AUSb   |
| AUS_DAS5-000503 | 0.4557 | 0.0163 | 0.0000 | 0.0000 | 0.0000 | 0.5280 | 0.0000 | 0.0000 | AUSb   |
| AUS_DAS5-000035 | 0.0000 | 0.0066 | 0.0000 | 0.4336 | 0.0319 | 0.5253 | 0.0025 | 0.0000 | AUSb   |
| AUS_DAS5-000186 | 0.4283 | 0.0569 | 0.0000 | 0.0000 | 0.0000 | 0.5148 | 0.0000 | 0.0000 | AUSb   |
| AUS_DAS5-000491 | 0.4864 | 0.0000 | 0.0000 | 0.0000 | 0.0000 | 0.5136 | 0.0000 | 0.0000 | AUSb   |
| AUS_DAS5-000301 | 0.0328 | 0.0000 | 0.0000 | 0.4579 | 0.0000 | 0.5093 | 0.0000 | 0.0000 | AUSb   |
| AUS_DAS5-000004 | 0.4909 | 0.0000 | 0.0000 | 0.0000 | 0.0000 | 0.5090 | 0.0000 | 0.0000 | AUSb   |
| AUS_DAS5-000432 | 0.0000 | 0.0000 | 0.0252 | 0.4665 | 0.0000 | 0.5083 | 0.0000 | 0.0000 | AUSb   |
| AUS_DAS5-000118 | 0.4192 | 0.0761 | 0.0000 | 0.0000 | 0.0000 | 0.5047 | 0.0000 | 0.0000 | AUSb   |

| Accessions         | Q1     | Q2     | Q3     | Q4     | Q5     | Q6     | Q7     | Q8     | Subpop |
|--------------------|--------|--------|--------|--------|--------|--------|--------|--------|--------|
| AUS_DAS5-000079    | 0.4961 | 0.0000 | 0.0000 | 0.0000 | 0.0000 | 0.5038 | 0.0000 | 0.0000 | AUSb   |
| AUS_DAS5-000094    | 0.4765 | 0.0307 | 0.0000 | 0.0000 | 0.0000 | 0.4927 | 0.0000 | 0.0000 | AUSb   |
| AUS_DAS5-000452    | 0.2367 | 0.0018 | 0.0000 | 0.2256 | 0.0295 | 0.4899 | 0.0000 | 0.0165 | AUSb   |
| AUS_DAS5-000406    | 0.0000 | 0.0495 | 0.0000 | 0.4426 | 0.0027 | 0.4568 | 0.0001 | 0.0483 | AUSb   |
| AUS_DAS5-000474    | 0.3473 | 0.0115 | 0.0000 | 0.1021 | 0.0319 | 0.4302 | 0.0000 | 0.0771 | AUSb   |
| AUS_DAS5-000121    | 0.3324 | 0.0000 | 0.0000 | 0.0469 | 0.1240 | 0.4237 | 0.0730 | 0.0000 | AUSb   |
| AUS_DAS5-000330    | 0.2616 | 0.0000 | 0.0000 | 0.3120 | 0.0000 | 0.4179 | 0.0085 | 0.0000 | AUSb   |
| ROM_DAS5-002281    | 0.0000 | 0.3349 | 0.0000 | 0.0350 | 0.0183 | 0.3521 | 0.2597 | 0.0000 | AUSb   |
| FIN_DAS5-002283    | 0.0000 | 0.0000 | 0.0000 | 0.0000 | 0.9999 | 0.0000 | 0.0000 | 0.0000 | EEU    |
| FSV_DAS5-002663    | 0.0000 | 0.0000 | 0.0000 | 0.0000 | 0.9999 | 0.0000 | 0.0000 | 0.0000 | EEU    |
| FSV_DAS5-003116    | 0.0000 | 0.0000 | 0.0000 | 0.0000 | 0.9999 | 0.0000 | 0.0000 | 0.0000 | EEU    |
| FSV_DAS5-003140    | 0.0000 | 0.0000 | 0.0000 | 0.0000 | 0.9999 | 0.0000 | 0.0000 | 0.0000 | EEU    |
| FSV_DAS5-003174    | 0.0000 | 0.0000 | 0.0000 | 0.0000 | 0.9999 | 0.0000 | 0.0000 | 0.0000 | EEU    |
| FSV_DAS5-003208    | 0.0000 | 0.0000 | 0.0000 | 0.0000 | 0.9999 | 0.0000 | 0.0000 | 0.0000 | EEU    |
| SPA_WATKINS-007454 | 0.0000 | 0.0000 | 0.0000 | 0.0000 | 0.9999 | 0.0000 | 0.0000 | 0.0000 | EEU    |
| FSV_DAS5-003191    | 0.0000 | 0.0000 | 0.0000 | 0.0000 | 0.9999 | 0.0000 | 0.0000 | 0.0000 | EEU    |
| ROM_DAS5-002943    | 0.0000 | 0.0000 | 0.0000 | 0.0000 | 0.9999 | 0.0000 | 0.0000 | 0.0000 | EEU    |
| FSV_DAS5-003195    | 0.0000 | 0.0000 | 0.0000 | 0.0000 | 0.9999 | 0.0000 | 0.0000 | 0.0000 | EEU    |
| FSV_DAS5-003183    | 0.0000 | 0.0000 | 0.0000 | 0.0000 | 0.9980 | 0.0000 | 0.0019 | 0.0000 | EEU    |
| FSV_DAS5-003164    | 0.0000 | 0.0000 | 0.0000 | 0.0000 | 0.9921 | 0.0000 | 0.0078 | 0.0000 | EEU    |
| UNK_WATKINS-007096 | 0.0000 | 0.0000 | 0.0000 | 0.0000 | 0.9910 | 0.0000 | 0.0090 | 0.0000 | EEU    |
| FSV_DAS5-003166    | 0.0000 | 0.0000 | 0.0000 | 0.0000 | 0.9879 | 0.0000 | 0.0121 | 0.0000 | EEU    |
| IND_WATKINS-007604 | 0.0000 | 0.0000 | 0.0000 | 0.0138 | 0.9861 | 0.0000 | 0.0000 | 0.0000 | EEU    |
| FSV_DAS5-003175    | 0.0000 | 0.0000 | 0.0000 | 0.0000 | 0.9822 | 0.0000 | 0.0178 | 0.0000 | EEU    |
| BRA_WATKINS-007179 | 0.0000 | 0.0000 | 0.0000 | 0.0000 | 0.9787 | 0.0000 | 0.0213 | 0.0000 | EEU    |
| TUR_WATKINS-007033 | 0.0000 | 0.0000 | 0.0000 | 0.0000 | 0.9786 | 0.0000 | 0.0213 | 0.0000 | EEU    |
| FSV_DAS5-002642    | 0.0000 | 0.0000 | 0.0000 | 0.0000 | 0.9772 | 0.0000 | 0.0228 | 0.0000 | EEU    |
| FSV_DAS5-003163    | 0.0000 | 0.0077 | 0.0150 | 0.0000 | 0.9754 | 0.0018 | 0.0000 | 0.0000 | EEU    |
| FSV_DAS5-003075    | 0.0000 | 0.0000 | 0.0036 | 0.0000 | 0.9740 | 0.0000 | 0.0000 | 0.0224 | EEU    |
| FSV_DAS5-002832    | 0.0000 | 0.0094 | 0.0218 | 0.0000 | 0.9688 | 0.0000 | 0.0000 | 0.0000 | EEU    |
| KAZ_DAS5-004324    | 0.0000 | 0.0000 | 0.0062 | 0.0000 | 0.9602 | 0.0000 | 0.0335 | 0.0000 | EEU    |
| BLR_DAS5-004326    | 0.0000 | 0.0000 | 0.0000 | 0.0000 | 0.9585 | 0.0327 | 0.0088 | 0.0000 | EEU    |
| IRQ_WATKINS-007697 | 0.0000 | 0.0000 | 0.0000 | 0.0000 | 0.9488 | 0.0000 | 0.0511 | 0.0000 | EEU    |
| CHN_WATKINS-007274 | 0.0000 | 0.0000 | 0.0000 | 0.0549 | 0.9451 | 0.0000 | 0.0000 | 0.0000 | EEU    |
| AZE_WATKINS-007170 | 0.0000 | 0.0000 | 0.0000 | 0.0000 | 0.9413 | 0.0000 | 0.0586 | 0.0000 | EEU    |
| RUS_DAS5-003961    | 0.0000 | 0.0000 | 0.0000 | 0.0602 | 0.9397 | 0.0000 | 0.0000 | 0.0000 | EEU    |
| BUL_WATKINS-007565 | 0.0000 | 0.0000 | 0.0057 | 0.0000 | 0.9374 | 0.0000 | 0.0000 | 0.0569 | EEU    |
| ROM_DAS5-002946    | 0.0000 | 0.0000 | 0.0245 | 0.0021 | 0.9368 | 0.0000 | 0.0000 | 0.0366 | EEU    |
| FSV_DAS5-002899    | 0.0000 | 0.0000 | 0.0000 | 0.0000 | 0.9309 | 0.0000 | 0.0690 | 0.0000 | EEU    |
| CHN_PI-70613       | 0.0000 | 0.0000 | 0.0000 | 0.0726 | 0.9274 | 0.0000 | 0.0000 | 0.0000 | EEU    |
| UNK_WATKINS-007099 | 0.0000 | 0.0000 | 0.0000 | 0.0000 | 0.9272 | 0.0000 | 0.0728 | 0.0000 | EEU    |

| Accessions         | Q1     | Q2     | Q3     | Q4     | Q5     | Q6     | Q7     | Q8     | Subpop |
|--------------------|--------|--------|--------|--------|--------|--------|--------|--------|--------|
| FSV_DAS5-002431    | 0.0000 | 0.0000 | 0.0000 | 0.0742 | 0.9257 | 0.0000 | 0.0000 | 0.0000 | EEU    |
| FSV_DAS5-003162    | 0.0000 | 0.0000 | 0.0000 | 0.0000 | 0.9253 | 0.0000 | 0.0746 | 0.0000 | EEU    |
| IND_WATKINS-007588 | 0.0005 | 0.0000 | 0.0000 | 0.0263 | 0.9103 | 0.0000 | 0.0629 | 0.0000 | EEU    |
| FSV_DAS5-002263    | 0.0000 | 0.0000 | 0.0327 | 0.0000 | 0.9026 | 0.0000 | 0.0277 | 0.0369 | EEU    |
| BUL_WATKINS-007763 | 0.0000 | 0.0000 | 0.0447 | 0.0000 | 0.8888 | 0.0000 | 0.0302 | 0.0362 | EEU    |
| POL_DAS5-002877    | 0.0000 | 0.0000 | 0.0000 | 0.0000 | 0.8861 | 0.0000 | 0.1139 | 0.0000 | EEU    |
| FSV_DAS5-002888    | 0.0000 | 0.0000 | 0.0000 | 0.0000 | 0.8737 | 0.0000 | 0.1262 | 0.0000 | EEU    |
| FSV_DAS5-002227    | 0.0000 | 0.0002 | 0.0093 | 0.0838 | 0.8645 | 0.0422 | 0.0000 | 0.0000 | EEU    |
| POL_DAS5-002868    | 0.0000 | 0.0000 | 0.0000 | 0.0203 | 0.8603 | 0.0000 | 0.0000 | 0.1193 | EEU    |
| FSV_DAS5-002099    | 0.0000 | 0.0231 | 0.0153 | 0.0000 | 0.8559 | 0.0000 | 0.1057 | 0.0000 | EEU    |
| YUG_WATKINS-007292 | 0.0000 | 0.0000 | 0.0000 | 0.0000 | 0.8508 | 0.0000 | 0.1179 | 0.0313 | EEU    |
| NOR_DAS5-003891    | 0.0028 | 0.0000 | 0.0000 | 0.0000 | 0.8410 | 0.0000 | 0.0000 | 0.1562 | EEU    |
| POL_DAS5-002869    | 0.0000 | 0.0000 | 0.0000 | 0.1325 | 0.8402 | 0.0000 | 0.0000 | 0.0272 | EEU    |
| POL_DAS5-002862    | 0.0000 | 0.0000 | 0.0000 | 0.0000 | 0.8342 | 0.0000 | 0.1657 | 0.0000 | EEU    |
| UKR_DAS5-004138    | 0.0000 | 0.0000 | 0.0000 | 0.0000 | 0.8270 | 0.0000 | 0.1729 | 0.0000 | EEU    |
| HUN_DAS5-002090    | 0.0027 | 0.0066 | 0.1165 | 0.0505 | 0.8236 | 0.0000 | 0.0000 | 0.0000 | EEU    |
| FSV_DAS5-002416    | 0.0000 | 0.0000 | 0.1158 | 0.0000 | 0.8115 | 0.0000 | 0.0727 | 0.0000 | EEU    |
| EUR_DAS5-004508    | 0.0129 | 0.0000 | 0.0000 | 0.0000 | 0.8063 | 0.0000 | 0.1611 | 0.0197 | EEU    |
| FSV_DAS5-002640    | 0.0000 | 0.0572 | 0.0990 | 0.0300 | 0.8039 | 0.0000 | 0.0000 | 0.0098 | EEU    |
| POL_DAS5-002878    | 0.0000 | 0.0000 | 0.0000 | 0.0000 | 0.8011 | 0.0000 | 0.1988 | 0.0000 | EEU    |
| EGY_WATKINS-007325 | 0.0067 | 0.0000 | 0.0106 | 0.0000 | 0.7930 | 0.0000 | 0.1896 | 0.0000 | EEU    |
| FSV_DAS5-003248    | 0.0000 | 0.0000 | 0.0530 | 0.0000 | 0.7926 | 0.0000 | 0.0000 | 0.1544 | EEU    |
| BUL_WATKINS-007563 | 0.0000 | 0.0000 | 0.0109 | 0.0000 | 0.7900 | 0.0000 | 0.1620 | 0.0370 | EEU    |
| UKR_DAS5-004471    | 0.0015 | 0.0144 | 0.0564 | 0.0000 | 0.7865 | 0.0000 | 0.0592 | 0.0820 | EEU    |
| ROM_DAS5-002945    | 0.0092 | 0.0069 | 0.0656 | 0.0000 | 0.7855 | 0.0158 | 0.0991 | 0.0179 | EEU    |
| FSV_WATKINS-007536 | 0.0000 | 0.0295 | 0.0512 | 0.0000 | 0.7743 | 0.0000 | 0.1450 | 0.0000 | EEU    |
| FSV_DAS5-002144    | 0.0000 | 0.0000 | 0.0000 | 0.0000 | 0.7717 | 0.0000 | 0.0400 | 0.1882 | EEU    |
| YUG_WATKINS-007290 | 0.0000 | 0.0000 | 0.0000 | 0.0000 | 0.7715 | 0.0000 | 0.2285 | 0.0000 | EEU    |
| FSV_DAS5-002968    | 0.0122 | 0.0000 | 0.0284 | 0.0000 | 0.7619 | 0.0000 | 0.0000 | 0.1974 | EEU    |
| AUS_WATKINS-007166 | 0.0000 | 0.0000 | 0.1083 | 0.1380 | 0.7536 | 0.0000 | 0.0000 | 0.0000 | EEU    |
| FSV_DAS5-002409    | 0.0076 | 0.0263 | 0.0056 | 0.0000 | 0.7522 | 0.0371 | 0.0000 | 0.1712 | EEU    |
| FSV_DAS5-002605    | 0.0000 | 0.0000 | 0.0100 | 0.0000 | 0.7518 | 0.0000 | 0.0232 | 0.2149 | EEU    |
| AUT_DAS5-003343    | 0.0000 | 0.0036 | 0.0319 | 0.0000 | 0.7499 | 0.0031 | 0.0000 | 0.2115 | EEU    |
| FSV_DAS5-002494    | 0.0028 | 0.0112 | 0.0693 | 0.0000 | 0.7431 | 0.0000 | 0.0000 | 0.1737 | EEU    |
| UKR_DAS5-002261    | 0.0182 | 0.0000 | 0.0468 | 0.0000 | 0.7413 | 0.0000 | 0.1937 | 0.0000 | EEU    |
| RUS_DAS5-002610    | 0.0267 | 0.0000 | 0.0000 | 0.0000 | 0.7321 | 0.0000 | 0.2411 | 0.0000 | EEU    |
| FSV_DAS5-003222    | 0.0092 | 0.0063 | 0.1575 | 0.0000 | 0.7258 | 0.0000 | 0.0000 | 0.1011 | EEU    |
| FIN_DAS5-002861    | 0.0000 | 0.0000 | 0.0105 | 0.0000 | 0.7225 | 0.0000 | 0.2669 | 0.0000 | EEU    |
| FSV_DAS5-002752    | 0.0000 | 0.0122 | 0.0000 | 0.0000 | 0.7209 | 0.0000 | 0.2668 | 0.0000 | EEU    |
| JAP_DAS5-004581    | 0.0000 | 0.0000 | 0.0000 | 0.0000 | 0.7126 | 0.0000 | 0.2655 | 0.0218 | EEU    |
| USA_DAS5-003109    | 0.0212 | 0.0000 | 0.1225 | 0.1136 | 0.7090 | 0.0000 | 0.0035 | 0.0302 | EEU    |

| Accessions         | Q1     | Q2     | Q3     | Q4     | Q5     | Q6     | Q7     | Q8     | Subpop |
|--------------------|--------|--------|--------|--------|--------|--------|--------|--------|--------|
| DEN_DAS5-003204    | 0.0084 | 0.0071 | 0.0028 | 0.0000 | 0.7069 | 0.0000 | 0.2749 | 0.0000 | EEU    |
| MON_DAS5-004267    | 0.0285 | 0.0067 | 0.0692 | 0.0000 | 0.6984 | 0.0000 | 0.0478 | 0.1494 | EEU    |
| BUL_DAS5-003205    | 0.0000 | 0.0000 | 0.0068 | 0.0000 | 0.6981 | 0.0000 | 0.0288 | 0.2662 | EEU    |
| ARM_DAS5-001950    | 0.0054 | 0.0000 | 0.2665 | 0.0000 | 0.6930 | 0.0000 | 0.0076 | 0.0274 | EEU    |
| FSV_DAS5-002142    | 0.0000 | 0.0000 | 0.1540 | 0.0000 | 0.6915 | 0.0000 | 0.0000 | 0.1545 | EEU    |
| POL_DAS5-002876    | 0.0000 | 0.0000 | 0.0000 | 0.0000 | 0.6800 | 0.0000 | 0.3200 | 0.0000 | EEU    |
| FSV_DAS5-003019    | 0.0000 | 0.0141 | 0.0815 | 0.0000 | 0.6732 | 0.0584 | 0.0993 | 0.0734 | EEU    |
| MOZ_DAS5-003855    | 0.0000 | 0.0000 | 0.0000 | 0.3275 | 0.6724 | 0.0000 | 0.0000 | 0.0000 | EEU    |
| AUT_DAS5-003342    | 0.0000 | 0.0024 | 0.0999 | 0.0000 | 0.6706 | 0.0000 | 0.0000 | 0.2271 | EEU    |
| FSV_DAS5-003047    | 0.0000 | 0.0056 | 0.2241 | 0.0000 | 0.6638 | 0.0000 | 0.0000 | 0.1064 | EEU    |
| GRE_WATKINS-007738 | 0.0000 | 0.0000 | 0.0484 | 0.0000 | 0.6633 | 0.0000 | 0.1083 | 0.1799 | EEU    |
| FSV_DAS5-002121    | 0.0000 | 0.0135 | 0.0867 | 0.2183 | 0.6619 | 0.0000 | 0.0000 | 0.0195 | EEU    |
| USA_DAS5-004692    | 0.0000 | 0.0000 | 0.1319 | 0.0657 | 0.6603 | 0.0000 | 0.0259 | 0.1161 | EEU    |
| FSV_DAS5-003050    | 0.0004 | 0.0000 | 0.0000 | 0.0597 | 0.6581 | 0.0000 | 0.1927 | 0.0892 | EEU    |
| POL_DAS5-002330    | 0.0000 | 0.0000 | 0.0000 | 0.0000 | 0.6533 | 0.0000 | 0.3467 | 0.0000 | EEU    |
| ARG_DAS5-002553    | 0.0047 | 0.0065 | 0.0021 | 0.1629 | 0.6516 | 0.0000 | 0.0224 | 0.1498 | EEU    |
| FSV_DAS5-002114    | 0.0000 | 0.0000 | 0.0000 | 0.0000 | 0.6504 | 0.0000 | 0.0608 | 0.2888 | EEU    |
| YUG_WATKINS-007174 | 0.0000 | 0.0000 | 0.0141 | 0.0000 | 0.6491 | 0.0000 | 0.0852 | 0.2515 | EEU    |
| FSV_DAS5-002687    | 0.0000 | 0.0000 | 0.0869 | 0.2692 | 0.6439 | 0.0000 | 0.0000 | 0.0000 | EEU    |
| NET_DAS5-001708    | 0.0000 | 0.0000 | 0.0000 | 0.0818 | 0.6415 | 0.0000 | 0.2767 | 0.0000 | EEU    |
| BOL_WSC-7-9        | 0.0000 | 0.0000 | 0.0000 | 0.3532 | 0.6412 | 0.0000 | 0.0000 | 0.0056 | EEU    |
| SWE_DAS5-001544    | 0.0000 | 0.0000 | 0.0000 | 0.0908 | 0.6391 | 0.0000 | 0.2700 | 0.0000 | EEU    |
| FSV_DAS5-002073    | 0.0381 | 0.0000 | 0.0000 | 0.0000 | 0.6327 | 0.0000 | 0.3291 | 0.0000 | EEU    |
| POL_DAS5-002863    | 0.0000 | 0.0000 | 0.0000 | 0.0000 | 0.6206 | 0.0000 | 0.3793 | 0.0000 | EEU    |
| FSV_DAS5-002359    | 0.0000 | 0.0000 | 0.0000 | 0.0000 | 0.6205 | 0.0000 | 0.3795 | 0.0000 | EEU    |
| FSV_DAS5-002860    | 0.0000 | 0.0000 | 0.0000 | 0.0000 | 0.6197 | 0.0000 | 0.3802 | 0.0000 | EEU    |
| FSV_DAS5-002965    | 0.0000 | 0.0000 | 0.0000 | 0.0033 | 0.6101 | 0.0000 | 0.0871 | 0.2995 | EEU    |
| FSV_DAS5-003172    | 0.0000 | 0.0000 | 0.1407 | 0.0000 | 0.6057 | 0.0000 | 0.0000 | 0.2535 | EEU    |
| AUS_WATKINS-007155 | 0.0000 | 0.0000 | 0.0000 | 0.2345 | 0.6022 | 0.0000 | 0.1633 | 0.0000 | EEU    |
| ARG_DAS5-004349    | 0.0000 | 0.0398 | 0.0231 | 0.2708 | 0.6017 | 0.0000 | 0.0000 | 0.0646 | EEU    |
| FSV_DAS5-002833    | 0.0222 | 0.0242 | 0.0326 | 0.0000 | 0.6015 | 0.0000 | 0.0000 | 0.3195 | EEU    |
| FIN_DAS5-001553    | 0.0000 | 0.0019 | 0.1769 | 0.2166 | 0.6008 | 0.0037 | 0.0000 | 0.0000 | EEU    |
| FSV_DAS5-003244    | 0.0000 | 0.0000 | 0.2773 | 0.0000 | 0.5867 | 0.0000 | 0.0000 | 0.1360 | EEU    |
| CRO_Cltr-11223     | 0.0000 | 0.0000 | 0.2541 | 0.0000 | 0.5841 | 0.0000 | 0.0000 | 0.1618 | EEU    |
| NET_DAS5-001374    | 0.0000 | 0.0000 | 0.0000 | 0.1652 | 0.5827 | 0.0000 | 0.1501 | 0.1020 | EEU    |
| SWE_DAS5-001790    | 0.0000 | 0.0000 | 0.2527 | 0.0419 | 0.5815 | 0.0000 | 0.0000 | 0.1239 | EEU    |
| RUS_DAS5-002308    | 0.0064 | 0.0000 | 0.0000 | 0.0067 | 0.5809 | 0.0000 | 0.4059 | 0.0000 | EEU    |
| ARG_DAS5-002550    | 0.0003 | 0.0333 | 0.0000 | 0.1659 | 0.5806 | 0.0000 | 0.1332 | 0.0866 | EEU    |
| YUG_WATKINS-007803 | 0.1276 | 0.0000 | 0.0067 | 0.2259 | 0.5768 | 0.0000 | 0.0629 | 0.0000 | EEU    |
| GRE_WATKINS-007523 | 0.0056 | 0.0051 | 0.0590 | 0.0000 | 0.5764 | 0.0000 | 0.0293 | 0.3247 | EEU    |
| FSV_DAS5-004476    | 0.0380 | 0.0346 | 0.1371 | 0.0000 | 0.5761 | 0.0320 | 0.0365 | 0.1457 | EEU    |

| Accessions         | Q1     | Q2     | Q3     | Q4     | Q5     | Q6     | Q7     | Q8     | Subpop |
|--------------------|--------|--------|--------|--------|--------|--------|--------|--------|--------|
| DEN_DAS5-003490    | 0.0252 | 0.0229 | 0.0256 | 0.0000 | 0.5697 | 0.0000 | 0.2073 | 0.1493 | EEU    |
| USA_DAS5-004431    | 0.0382 | 0.0399 | 0.1364 | 0.0000 | 0.5696 | 0.0233 | 0.0486 | 0.1439 | EEU    |
| ARG_DAS5-002153    | 0.0406 | 0.0000 | 0.0507 | 0.0747 | 0.5691 | 0.0025 | 0.0196 | 0.2429 | EEU    |
| CZE_DAS5-003484    | 0.0000 | 0.0000 | 0.0000 | 0.0000 | 0.5637 | 0.0000 | 0.4362 | 0.0000 | EEU    |
| ARG_DAS5-002546    | 0.0000 | 0.0363 | 0.0000 | 0.2217 | 0.5580 | 0.0000 | 0.0000 | 0.1839 | EEU    |
| UNK_DAS5-004200    | 0.0000 | 0.0000 | 0.0976 | 0.2883 | 0.5527 | 0.0000 | 0.0039 | 0.0575 | EEU    |
| YUG_WATKINS-007061 | 0.0000 | 0.0000 | 0.0000 | 0.0000 | 0.5526 | 0.0000 | 0.1881 | 0.2593 | EEU    |
| FSV_DAS5-002111    | 0.0000 | 0.0010 | 0.0039 | 0.0636 | 0.5515 | 0.0000 | 0.2384 | 0.1415 | EEU    |
| BUL_WATKINS-007769 | 0.0000 | 0.0000 | 0.0000 | 0.0000 | 0.5511 | 0.0000 | 0.4488 | 0.0000 | EEU    |
| SWI_DAS5-004053    | 0.0734 | 0.0447 | 0.0138 | 0.2181 | 0.5430 | 0.0000 | 0.0160 | 0.0909 | EEU    |
| SWI_DAS5-004047    | 0.0000 | 0.0196 | 0.0122 | 0.0846 | 0.5400 | 0.0218 | 0.3043 | 0.0175 | EEU    |
| USA_DAS5-LEWJAIN   | 0.0000 | 0.0000 | 0.2261 | 0.1397 | 0.5395 | 0.0000 | 0.0795 | 0.0151 | EEU    |
| KAZ_DAS5-001436    | 0.0548 | 0.0327 | 0.1622 | 0.0072 | 0.5391 | 0.0125 | 0.0357 | 0.1559 | EEU    |
| AUS_WATKINS-007777 | 0.0000 | 0.0061 | 0.3619 | 0.0000 | 0.5367 | 0.0126 | 0.0000 | 0.0827 | EEU    |
| UKR_DAS5-003257    | 0.0464 | 0.0000 | 0.0000 | 0.2564 | 0.5345 | 0.0000 | 0.1627 | 0.0000 | EEU    |
| GRE_WATKINS-007524 | 0.0000 | 0.0033 | 0.0600 | 0.0000 | 0.5257 | 0.0000 | 0.2009 | 0.2100 | EEU    |
| CAN_DAS5-001453    | 0.0049 | 0.0000 | 0.3201 | 0.1385 | 0.5247 | 0.0000 | 0.0117 | 0.0000 | EEU    |
| FSV_DAS5-003553    | 0.0000 | 0.0000 | 0.0000 | 0.1579 | 0.5207 | 0.0000 | 0.1000 | 0.2213 | EEU    |
| ROM_DAS5-002385    | 0.0277 | 0.0000 | 0.0158 | 0.3319 | 0.5204 | 0.0000 | 0.1041 | 0.0000 | EEU    |
| FSV_DAS5-002269    | 0.0000 | 0.0000 | 0.0000 | 0.0000 | 0.5103 | 0.0000 | 0.4897 | 0.0000 | EEU    |
| MOR_WATKINS-007435 | 0.0000 | 0.0940 | 0.0132 | 0.0000 | 0.4968 | 0.0932 | 0.1362 | 0.1666 | EEU    |
| USA_DAS5-004469    | 0.0279 | 0.0040 | 0.0524 | 0.0065 | 0.4946 | 0.0000 | 0.4145 | 0.0000 | EEU    |
| AUS_WATKINS-007162 | 0.0000 | 0.0000 | 0.1369 | 0.3686 | 0.4944 | 0.0000 | 0.0000 | 0.0000 | EEU    |
| SWI_DAS5-004055    | 0.0340 | 0.0000 | 0.1228 | 0.1178 | 0.4902 | 0.0000 | 0.1245 | 0.1107 | EEU    |
| GEO_PI-572692      | 0.0000 | 0.0802 | 0.0000 | 0.4297 | 0.4900 | 0.0000 | 0.0000 | 0.0000 | EEU    |
| FSV_DAS5-002649    | 0.0115 | 0.0581 | 0.1669 | 0.0425 | 0.4895 | 0.0097 | 0.0000 | 0.2217 | EEU    |
| USA_DAS5-004540    | 0.0390 | 0.0000 | 0.0456 | 0.0774 | 0.4822 | 0.0119 | 0.3439 | 0.0000 | EEU    |
| AUS_DAS5-EMMIT     | 0.0487 | 0.0000 | 0.0335 | 0.0204 | 0.4740 | 0.0000 | 0.4193 | 0.0041 | EEU    |
| USA_DAS5-004527    | 0.0386 | 0.0086 | 0.2784 | 0.1300 | 0.4740 | 0.0145 | 0.0560 | 0.0000 | EEU    |
| GER_DAS5-001733    | 0.0412 | 0.0000 | 0.1291 | 0.0317 | 0.4734 | 0.0000 | 0.1854 | 0.1393 | EEU    |
| IND_DAS5-001047    | 0.0381 | 0.0000 | 0.1303 | 0.0312 | 0.4732 | 0.0000 | 0.1873 | 0.1399 | EEU    |
| AUS_WATKINS-007084 | 0.0000 | 0.0122 | 0.0513 | 0.0000 | 0.4705 | 0.0000 | 0.0829 | 0.3830 | EEU    |
| SWI_DAS5-004420    | 0.0000 | 0.0000 | 0.0000 | 0.0000 | 0.4669 | 0.0000 | 0.4540 | 0.0790 | EEU    |
| FSV_DAS5-002266    | 0.0403 | 0.0918 | 0.0000 | 0.4018 | 0.4660 | 0.0000 | 0.0000 | 0.0000 | EEU    |
| RUS_Cltr-7635      | 0.0000 | 0.0000 | 0.3673 | 0.0000 | 0.4646 | 0.0000 | 0.0000 | 0.1680 | EEU    |
| USA_DAS5-004615    | 0.0336 | 0.0255 | 0.0411 | 0.0524 | 0.4625 | 0.0172 | 0.2512 | 0.1165 | EEU    |
| ROM_DAS5-003128    | 0.0550 | 0.0000 | 0.0208 | 0.0431 | 0.4624 | 0.0000 | 0.4187 | 0.0000 | EEU    |
| ROM_DAS5-004609    | 0.0536 | 0.0000 | 0.0279 | 0.0411 | 0.4557 | 0.0000 | 0.4216 | 0.0000 | EEU    |
| KAZ_DAS5-004472    | 0.0503 | 0.0000 | 0.3636 | 0.0000 | 0.4514 | 0.0000 | 0.0909 | 0.0438 | EEU    |
| GEO_WATKINS-007824 | 0.0000 | 0.0000 | 0.2731 | 0.0000 | 0.4501 | 0.0000 | 0.0000 | 0.2767 | EEU    |
| BUL_DAS5-003415    | 0.0828 | 0.0000 | 0.0092 | 0.0639 | 0.4497 | 0.0000 | 0.3944 | 0.0000 | EEU    |

| Accessions         | Q1     | Q2     | Q3     | Q4     | Q5     | Q6     | Q7     | Q8     | Subpop |
|--------------------|--------|--------|--------|--------|--------|--------|--------|--------|--------|
| ARG_DAS5-002594    | 0.0000 | 0.0000 | 0.0183 | 0.1713 | 0.4473 | 0.0000 | 0.0925 | 0.2706 | EEU    |
| USA_DAS5-004473    | 0.0172 | 0.0000 | 0.2632 | 0.0257 | 0.4459 | 0.0000 | 0.0683 | 0.1796 | EEU    |
| FSV_DAS5-002477    | 0.0261 | 0.0586 | 0.0000 | 0.1641 | 0.4424 | 0.0000 | 0.1502 | 0.1586 | EEU    |
| UNK_WATKINS-007446 | 0.0000 | 0.0052 | 0.0000 | 0.0000 | 0.4406 | 0.0068 | 0.4337 | 0.1136 | EEU    |
| EGY_DAS5-001797    | 0.0056 | 0.0131 | 0.1143 | 0.1992 | 0.4404 | 0.0000 | 0.0985 | 0.1289 | EEU    |
| SWI_DAS5-004054    | 0.0607 | 0.0571 | 0.0571 | 0.2583 | 0.4388 | 0.0000 | 0.0000 | 0.1280 | EEU    |
| MAC_DAS5-003783    | 0.0010 | 0.0045 | 0.1507 | 0.0461 | 0.4387 | 0.0000 | 0.0000 | 0.3590 | EEU    |
| USA_DAS5-001495    | 0.0000 | 0.0000 | 0.1558 | 0.2964 | 0.4350 | 0.0000 | 0.0277 | 0.0852 | EEU    |
| KEN_DAS5-001378    | 0.0000 | 0.0000 | 0.2071 | 0.1422 | 0.4297 | 0.0000 | 0.2209 | 0.0000 | EEU    |
| AFG_WATKINS-007108 | 0.0000 | 0.0000 | 0.3759 | 0.0000 | 0.4254 | 0.0000 | 0.1987 | 0.0000 | EEU    |
| JAP_DAS5-003725    | 0.0404 | 0.0000 | 0.0567 | 0.2341 | 0.4242 | 0.0000 | 0.0706 | 0.1740 | EEU    |
| USA_DAS5-MDM       | 0.0225 | 0.0000 | 0.3155 | 0.1365 | 0.4196 | 0.0000 | 0.0753 | 0.0307 | EEU    |
| YUG_WATKINS-007745 | 0.0741 | 0.0000 | 0.0000 | 0.0371 | 0.4153 | 0.0000 | 0.3233 | 0.1501 | EEU    |
| USA_DAS5-001582    | 0.0000 | 0.0129 | 0.1863 | 0.3376 | 0.4129 | 0.0000 | 0.0225 | 0.0278 | EEU    |
| RUS_WATKINS-007288 | 0.0000 | 0.0000 | 0.0000 | 0.0000 | 0.4114 | 0.0000 | 0.3720 | 0.2165 | EEU    |
| RUS_DAS5-002997    | 0.0179 | 0.0000 | 0.3716 | 0.0000 | 0.4033 | 0.0028 | 0.0000 | 0.2044 | EEU    |
| USA_DAS5-004550    | 0.0000 | 0.0022 | 0.0920 | 0.1232 | 0.3970 | 0.0275 | 0.3581 | 0.0000 | EEU    |
| KEN_DAS5-003749    | 0.0048 | 0.0421 | 0.1168 | 0.1450 | 0.3890 | 0.0000 | 0.0616 | 0.2407 | EEU    |
| ARG_DAS5-002570    | 0.0000 | 0.0141 | 0.0000 | 0.2100 | 0.3852 | 0.0000 | 0.1877 | 0.2031 | EEU    |
| TAI_DAS5-001895    | 0.0005 | 0.0000 | 0.2661 | 0.1867 | 0.3839 | 0.0000 | 0.1362 | 0.0266 | EEU    |
| SPA_WATKINS-007190 | 0.0000 | 0.0181 | 0.0000 | 0.0599 | 0.3770 | 0.0000 | 0.1876 | 0.3574 | EEU    |
| SWE_WSC-7-5        | 0.0000 | 0.0000 | 0.1740 | 0.2545 | 0.3765 | 0.0000 | 0.0000 | 0.1950 | EEU    |
| FSV_DAS5-002075    | 0.0105 | 0.0021 | 0.0934 | 0.0000 | 0.3725 | 0.0000 | 0.2248 | 0.2966 | EEU    |
| USA_DAS5-001612    | 0.0545 | 0.0361 | 0.0131 | 0.2152 | 0.3696 | 0.0000 | 0.2093 | 0.1022 | EEU    |
| USA_DAS5-004590    | 0.0723 | 0.0000 | 0.0992 | 0.2212 | 0.3664 | 0.0000 | 0.2409 | 0.0000 | EEU    |
| AUS_DAS5-002071    | 0.0000 | 0.0000 | 0.0040 | 0.3326 | 0.3661 | 0.0000 | 0.0000 | 0.2974 | EEU    |
| ARG_DAS5-002176    | 0.0659 | 0.0158 | 0.0080 | 0.2500 | 0.3592 | 0.0000 | 0.1373 | 0.1639 | EEU    |
| DEN_DAS5-004666    | 0.0000 | 0.0147 | 0.2762 | 0.0000 | 0.3564 | 0.0000 | 0.2890 | 0.0638 | EEU    |
| USA_DAS5-003063    | 0.0163 | 0.1392 | 0.0000 | 0.0727 | 0.3513 | 0.0699 | 0.1084 | 0.2422 | EEU    |
| ARG_WATKINS-007065 | 0.0064 | 0.0306 | 0.2660 | 0.0000 | 0.3484 | 0.0045 | 0.2605 | 0.0835 | EEU    |
| AUS_DAS5-002267    | 0.0000 | 0.0210 | 0.0000 | 0.2106 | 0.3435 | 0.1200 | 0.0438 | 0.2611 | EEU    |
| USA_DAS5-004408    | 0.0147 | 0.0274 | 0.0133 | 0.1302 | 0.3392 | 0.0151 | 0.3356 | 0.1245 | EEU    |
| SPA_WATKINS-007518 | 0.0000 | 0.2394 | 0.0000 | 0.2254 | 0.3244 | 0.2108 | 0.0000 | 0.0000 | EEU    |
| JOR_DAS5-003735    | 0.0000 | 0.1257 | 0.1724 | 0.2600 | 0.3229 | 0.1188 | 0.0000 | 0.0002 | EEU    |
| TUN_WATKINS-007759 | 0.0000 | 0.0000 | 0.2701 | 0.1165 | 0.3105 | 0.0000 | 0.0418 | 0.2612 | EEU    |
| IRQ_WATKINS-007715 | 0.0057 | 0.0276 | 0.2181 | 0.0000 | 0.3024 | 0.0000 | 0.1700 | 0.2761 | EEU    |
| ARG_DAS5-004660    | 0.0000 | 0.0645 | 0.0615 | 0.2513 | 0.2823 | 0.1838 | 0.0610 | 0.0955 | EEU    |
| FRA_DAS5-002453    | 0.0000 | 0.0000 | 0.0000 | 0.0000 | 0.0000 | 0.0000 | 0.9999 | 0.0000 | EUMED  |
| FRA_DAS5-004512    | 0.0000 | 0.0000 | 0.0000 | 0.0000 | 0.0000 | 0.0000 | 0.9999 | 0.0000 | EUMED  |
| YUG_WATKINS-007079 | 0.0000 | 0.0000 | 0.0000 | 0.0000 | 0.0000 | 0.0000 | 0.9999 | 0.0000 | EUMED  |
| FRA_WATKINS-007316 | 0.0000 | 0.0000 | 0.0000 | 0.0000 | 0.0000 | 0.0000 | 0.9999 | 0.0000 | EUMED  |



| Accessions         | Q1     | Q2     | Q3     | Q4     | Q5     | Q6     | Q7     | Q8     | Subpop |
|--------------------|--------|--------|--------|--------|--------|--------|--------|--------|--------|
| BEL_DAS5-004343    | 0.0000 | 0.0000 | 0.0000 | 0.0305 | 0.0000 | 0.0000 | 0.9695 | 0.0000 | EUMED  |
| FSV_DAS5-003149    | 0.0000 | 0.0000 | 0.0000 | 0.0000 | 0.0000 | 0.0000 | 0.9396 | 0.0603 | EUMED  |
| NET_DAS5-004495    | 0.0000 | 0.0000 | 0.0729 | 0.0000 | 0.0000 | 0.0000 | 0.9271 | 0.0000 | EUMED  |
| FRA_DAS5-004402    | 0.0000 | 0.0000 | 0.0014 | 0.0276 | 0.0351 | 0.0000 | 0.9264 | 0.0095 | EUMED  |
| YUG_WATKINS-007295 | 0.0000 | 0.0000 | 0.0000 | 0.0000 | 0.1050 | 0.0000 | 0.8949 | 0.0000 | EUMED  |
| CHL_DAS5-001008    | 0.0000 | 0.0000 | 0.0000 | 0.0000 | 0.1217 | 0.0000 | 0.8782 | 0.0000 | EUMED  |
| IND_WATKINS-007585 | 0.0000 | 0.0000 | 0.0000 | 0.0611 | 0.0000 | 0.0000 | 0.8716 | 0.0672 | EUMED  |
| USA_DAS5-004185    | 0.0000 | 0.0000 | 0.0000 | 0.0867 | 0.0439 | 0.0000 | 0.8693 | 0.0000 | EUMED  |
| SWE_DAS5-004043    | 0.0000 | 0.0000 | 0.1500 | 0.0000 | 0.0000 | 0.0000 | 0.8500 | 0.0000 | EUMED  |
| GER_DAS5-004426    | 0.0000 | 0.0000 | 0.0000 | 0.0000 | 0.1681 | 0.0000 | 0.8319 | 0.0000 | EUMED  |
| GBR_DAS5-004603    | 0.0000 | 0.0065 | 0.0271 | 0.0435 | 0.0966 | 0.0037 | 0.8226 | 0.0000 | EUMED  |
| USA_DAS5-004167    | 0.0295 | 0.0000 | 0.0000 | 0.1266 | 0.0300 | 0.0000 | 0.8139 | 0.0000 | EUMED  |
| MAC_DAS5-004268    | 0.0000 | 0.0000 | 0.0060 | 0.0000 | 0.1087 | 0.0000 | 0.8123 | 0.0731 | EUMED  |
| ZIM_DAS5-001850    | 0.0370 | 0.0000 | 0.0769 | 0.0599 | 0.0083 | 0.0000 | 0.7922 | 0.0257 | EUMED  |
| IND_WATKINS-007800 | 0.0000 | 0.0000 | 0.0000 | 0.0003 | 0.0290 | 0.0000 | 0.7868 | 0.1838 | EUMED  |
| BUL_WATKINS-007766 | 0.0000 | 0.0000 | 0.0000 | 0.0000 | 0.0492 | 0.0000 | 0.7686 | 0.1821 | EUMED  |
| SPA_WATKINS-007445 | 0.0000 | 0.0000 | 0.0000 | 0.0000 | 0.0000 | 0.0042 | 0.7582 | 0.2376 | EUMED  |
| CHN_WATKINS-007248 | 0.0000 | 0.0000 | 0.0000 | 0.0000 | 0.2427 | 0.0000 | 0.7573 | 0.0000 | EUMED  |
| CZE_DAS5-004638    | 0.0000 | 0.0000 | 0.0000 | 0.0000 | 0.2444 | 0.0000 | 0.7556 | 0.0000 | EUMED  |
| GEO_DAS5-003574    | 0.0000 | 0.0000 | 0.0000 | 0.0000 | 0.1532 | 0.0000 | 0.7530 | 0.0937 | EUMED  |
| BEL_DAS5-004553    | 0.0733 | 0.0000 | 0.0814 | 0.0000 | 0.1133 | 0.0000 | 0.7319 | 0.0000 | EUMED  |
| MOR_WATKINS-007014 | 0.0000 | 0.0000 | 0.0000 | 0.0000 | 0.2660 | 0.0000 | 0.7214 | 0.0125 | EUMED  |
| ITA_DAS5-004421    | 0.0000 | 0.0000 | 0.0000 | 0.0000 | 0.0000 | 0.0000 | 0.7113 | 0.2886 | EUMED  |
| SPA_WATKINS-007451 | 0.0000 | 0.0000 | 0.0000 | 0.0708 | 0.1371 | 0.0113 | 0.6955 | 0.0853 | EUMED  |
| DEN_DAS5-004333    | 0.0001 | 0.0101 | 0.0129 | 0.0000 | 0.2856 | 0.0000 | 0.6913 | 0.0000 | EUMED  |
| GER_DAS5-004694    | 0.0000 | 0.0000 | 0.0011 | 0.0000 | 0.2831 | 0.0000 | 0.6778 | 0.0380 | EUMED  |
| SPA_WATKINS-007643 | 0.0000 | 0.0000 | 0.0000 | 0.0000 | 0.0000 | 0.0000 | 0.6721 | 0.3278 | EUMED  |
| POR_WATKINS-007500 | 0.0193 | 0.0000 | 0.0042 | 0.0809 | 0.1071 | 0.0000 | 0.6715 | 0.1169 | EUMED  |
| ROM_DAS5-002781    | 0.0000 | 0.0000 | 0.0127 | 0.0000 | 0.3135 | 0.0039 | 0.6700 | 0.0000 | EUMED  |
| SPA_WATKINS-007452 | 0.0000 | 0.0000 | 0.0000 | 0.0000 | 0.1543 | 0.0159 | 0.6684 | 0.1614 | EUMED  |
| TUR_WATKINS-007756 | 0.0000 | 0.0000 | 0.0000 | 0.0000 | 0.0000 | 0.0000 | 0.6595 | 0.3404 | EUMED  |
| AUT_DAS5-003346    | 0.0000 | 0.0000 | 0.0000 | 0.0000 | 0.3437 | 0.0000 | 0.6562 | 0.0000 | EUMED  |
| BOS_DAS5-003394    | 0.0000 | 0.0000 | 0.0031 | 0.1136 | 0.1180 | 0.0000 | 0.6452 | 0.1200 | EUMED  |
| GBR_DAS5-004156    | 0.0348 | 0.0000 | 0.0000 | 0.2604 | 0.0597 | 0.0000 | 0.6450 | 0.0000 | EUMED  |
| TUR_WSC-8-6        | 0.2003 | 0.0000 | 0.1557 | 0.0006 | 0.0000 | 0.0000 | 0.6434 | 0.0000 | EUMED  |
| GBR_DAS5-004425    | 0.0099 | 0.0061 | 0.0000 | 0.0000 | 0.2769 | 0.0000 | 0.6433 | 0.0638 | EUMED  |
| FSV_DAS5-003084    | 0.0581 | 0.0336 | 0.2129 | 0.0411 | 0.0063 | 0.0050 | 0.6431 | 0.0000 | EUMED  |
| NEW_DAS5-004328    | 0.0000 | 0.0486 | 0.0000 | 0.0768 | 0.0285 | 0.0442 | 0.6431 | 0.1589 | EUMED  |
| MOR_WATKINS-007651 | 0.0000 | 0.0000 | 0.0000 | 0.0000 | 0.0000 | 0.0000 | 0.6422 | 0.3578 | EUMED  |
| FSV_DAS5-002992    | 0.0000 | 0.0000 | 0.0000 | 0.0256 | 0.2502 | 0.0000 | 0.6359 | 0.0883 | EUMED  |
| POL_DAS5-002864    | 0.0000 | 0.0000 | 0.0000 | 0.0000 | 0.3665 | 0.0000 | 0.6334 | 0.0000 | EUMED  |

| Accessions         | Q1     | Q2     | Q3     | Q4     | Q5     | Q6     | Q7     | Q8     | Subpop |
|--------------------|--------|--------|--------|--------|--------|--------|--------|--------|--------|
| USA_DAS5-004571    | 0.0000 | 0.0000 | 0.0000 | 0.0248 | 0.3434 | 0.0000 | 0.6318 | 0.0000 | EUMED  |
| POR_DAS5-001493    | 0.0000 | 0.0000 | 0.0000 | 0.0000 | 0.0000 | 0.0000 | 0.6285 | 0.3715 | EUMED  |
| JAP_DAS5-003731    | 0.0210 | 0.0000 | 0.2351 | 0.0000 | 0.1192 | 0.0000 | 0.6246 | 0.0000 | EUMED  |
| MAC_DAS5-003778    | 0.0000 | 0.0000 | 0.0274 | 0.0000 | 0.1670 | 0.0000 | 0.6223 | 0.1832 | EUMED  |
| POL_DAS5-003915    | 0.0090 | 0.0000 | 0.0366 | 0.0000 | 0.3268 | 0.0059 | 0.6217 | 0.0000 | EUMED  |
| NEW_DAS5-004587    | 0.0000 | 0.1545 | 0.0421 | 0.0000 | 0.0101 | 0.0089 | 0.6215 | 0.1630 | EUMED  |
| ITA_DAS5-003724    | 0.0238 | 0.0457 | 0.0000 | 0.0357 | 0.1886 | 0.0000 | 0.6166 | 0.0896 | EUMED  |
| SPA_WATKINS-007572 | 0.0000 | 0.0016 | 0.0000 | 0.0000 | 0.0997 | 0.0000 | 0.6138 | 0.2849 | EUMED  |
| CAN_DAS5-004364    | 0.0000 | 0.0000 | 0.0000 | 0.0000 | 0.3746 | 0.0000 | 0.6138 | 0.0116 | EUMED  |
| BEL_DAS5-003357    | 0.0000 | 0.0000 | 0.3449 | 0.0499 | 0.0000 | 0.0000 | 0.6052 | 0.0000 | EUMED  |
| CZE_DAS5-004468    | 0.0017 | 0.0000 | 0.0186 | 0.0384 | 0.3375 | 0.0000 | 0.6037 | 0.0000 | EUMED  |
| GRE_DAS5-003599    | 0.0869 | 0.0143 | 0.0681 | 0.1905 | 0.0339 | 0.0000 | 0.6030 | 0.0033 | EUMED  |
| USA_DAS5-003074    | 0.0000 | 0.0000 | 0.0000 | 0.0840 | 0.3201 | 0.0000 | 0.5959 | 0.0000 | EUMED  |
| MEX_WATKINS-007412 | 0.0319 | 0.0000 | 0.3203 | 0.0000 | 0.0000 | 0.0000 | 0.5909 | 0.0569 | EUMED  |
| AUS_DAS5-HILL-81   | 0.0010 | 0.0000 | 0.0380 | 0.1200 | 0.2502 | 0.0000 | 0.5907 | 0.0000 | EUMED  |
| ROM_DAS5-003943    | 0.0165 | 0.0000 | 0.0004 | 0.0000 | 0.4050 | 0.0000 | 0.5782 | 0.0000 | EUMED  |
| OMA_DAS5-001134    | 0.0158 | 0.0000 | 0.0000 | 0.3909 | 0.0172 | 0.0000 | 0.5760 | 0.0000 | EUMED  |
| USA_DAS5-001756    | 0.0000 | 0.0000 | 0.0000 | 0.2380 | 0.0822 | 0.0000 | 0.5739 | 0.1059 | EUMED  |
| IRQ_WATKINS-007691 | 0.0063 | 0.0000 | 0.0174 | 0.0288 | 0.0389 | 0.0000 | 0.5706 | 0.3381 | EUMED  |
| DEN_DAS5-003494    | 0.0015 | 0.0000 | 0.0031 | 0.0034 | 0.3843 | 0.0000 | 0.5703 | 0.0373 | EUMED  |
| POR_DAS5-002362    | 0.0000 | 0.0000 | 0.0000 | 0.0000 | 0.1206 | 0.0103 | 0.5699 | 0.2992 | EUMED  |
| CRO_DAS5-003477    | 0.0308 | 0.0000 | 0.0807 | 0.2342 | 0.0854 | 0.0000 | 0.5689 | 0.0000 | EUMED  |
| POL_DAS5-002998    | 0.0265 | 0.1790 | 0.0000 | 0.0000 | 0.1363 | 0.0961 | 0.5621 | 0.0000 | EUMED  |
| ROM_DAS5-002299    | 0.0768 | 0.0000 | 0.0404 | 0.0000 | 0.3215 | 0.0000 | 0.5613 | 0.0000 | EUMED  |
| IND_WATKINS-007395 | 0.0000 | 0.0000 | 0.4402 | 0.0000 | 0.0000 | 0.0000 | 0.5597 | 0.0000 | EUMED  |
| USA_DAS5-004178    | 0.0014 | 0.0013 | 0.0000 | 0.0114 | 0.4061 | 0.0000 | 0.5588 | 0.0209 | EUMED  |
| ITA_DAS5-003721    | 0.1845 | 0.0000 | 0.2583 | 0.0000 | 0.0000 | 0.0000 | 0.5572 | 0.0000 | EUMED  |
| USA_DAS5-004166    | 0.0296 | 0.0000 | 0.0083 | 0.3434 | 0.0000 | 0.0084 | 0.5518 | 0.0585 | EUMED  |
| CHN_WATKINS-007212 | 0.0240 | 0.2797 | 0.0286 | 0.0340 | 0.0261 | 0.0168 | 0.5500 | 0.0409 | EUMED  |
| BUL_DAS5-002857    | 0.0975 | 0.0201 | 0.0596 | 0.0450 | 0.2309 | 0.0016 | 0.5453 | 0.0000 | EUMED  |
| MEX_DAS5-CARA      | 0.0096 | 0.0000 | 0.0674 | 0.0515 | 0.3379 | 0.0000 | 0.5335 | 0.0000 | EUMED  |
| CHN_WATKINS-007244 | 0.0000 | 0.0000 | 0.0000 | 0.0236 | 0.4425 | 0.0000 | 0.5326 | 0.0013 | EUMED  |
| RUS_DAS5-002228    | 0.0000 | 0.0000 | 0.0353 | 0.0191 | 0.4138 | 0.0000 | 0.5318 | 0.0000 | EUMED  |
| CHN_WATKINS-007260 | 0.0105 | 0.0000 | 0.3175 | 0.0237 | 0.1194 | 0.0000 | 0.5289 | 0.0000 | EUMED  |
| KYR_DAS5-004555    | 0.0000 | 0.0173 | 0.0000 | 0.0000 | 0.3848 | 0.0206 | 0.5265 | 0.0508 | EUMED  |
| CAN_WATKINS-007678 | 0.0189 | 0.0000 | 0.0439 | 0.0031 | 0.0050 | 0.0000 | 0.5259 | 0.4031 | EUMED  |
| AUT_DAS5-004389    | 0.0059 | 0.0000 | 0.0000 | 0.0000 | 0.4721 | 0.0000 | 0.5219 | 0.0000 | EUMED  |
| CHN_WATKINS-007272 | 0.0529 | 0.0000 | 0.3307 | 0.0123 | 0.0840 | 0.0000 | 0.5202 | 0.0000 | EUMED  |
| JAP_DAS5-003729    | 0.0000 | 0.0000 | 0.0000 | 0.0000 | 0.4398 | 0.0000 | 0.5152 | 0.0449 | EUMED  |
| DEN_DAS5-003493    | 0.0348 | 0.0195 | 0.0712 | 0.0141 | 0.1530 | 0.0000 | 0.5147 | 0.1926 | EUMED  |
| SPA_WATKINS-007449 | 0.0000 | 0.0000 | 0.0000 | 0.0000 | 0.0948 | 0.0000 | 0.5145 | 0.3907 | EUMED  |

| Accessions         | Q1     | Q2     | Q3     | Q4     | Q5     | Q6     | Q7     | Q8     | Subpop |
|--------------------|--------|--------|--------|--------|--------|--------|--------|--------|--------|
| BEL_DAS5-004342    | 0.0066 | 0.0118 | 0.0259 | 0.0018 | 0.4140 | 0.0000 | 0.5129 | 0.0270 | EUMED  |
| GUA_DAS5-001503    | 0.0309 | 0.0009 | 0.0229 | 0.0963 | 0.1516 | 0.0000 | 0.5102 | 0.1871 | EUMED  |
| BUR_DAS5-001036    | 0.2168 | 0.0000 | 0.0000 | 0.2482 | 0.0000 | 0.0000 | 0.5069 | 0.0280 | EUMED  |
| AUS_WATKINS-007285 | 0.0000 | 0.0000 | 0.0000 | 0.0000 | 0.4395 | 0.0000 | 0.5028 | 0.0576 | EUMED  |
| CHN_DAS5-001672    | 0.0941 | 0.0000 | 0.0045 | 0.4032 | 0.0000 | 0.0000 | 0.4981 | 0.0000 | EUMED  |
| USA_DAS5-004165    | 0.0459 | 0.0000 | 0.0000 | 0.2774 | 0.1803 | 0.0000 | 0.4964 | 0.0000 | EUMED  |
| ROM_DAS5-003046    | 0.0256 | 0.0000 | 0.0000 | 0.2488 | 0.2310 | 0.0000 | 0.4946 | 0.0000 | EUMED  |
| CHL_DAS5-004288    | 0.0000 | 0.1696 | 0.0000 | 0.0056 | 0.1778 | 0.0000 | 0.4936 | 0.1534 | EUMED  |
| ARG_DAS5-002563    | 0.0000 | 0.0000 | 0.1868 | 0.0996 | 0.0670 | 0.0000 | 0.4836 | 0.1629 | EUMED  |
| BOS_DAS5-003393    | 0.0004 | 0.0000 | 0.0468 | 0.0000 | 0.3424 | 0.0000 | 0.4836 | 0.1267 | EUMED  |
| MOR_DAS5-002766    | 0.0000 | 0.0000 | 0.1754 | 0.1069 | 0.2444 | 0.0000 | 0.4733 | 0.0000 | EUMED  |
| AUS_DAS5-AVA       | 0.0588 | 0.0000 | 0.0159 | 0.0000 | 0.4522 | 0.0000 | 0.4730 | 0.0000 | EUMED  |
| PHI_DAS5-001051    | 0.3054 | 0.0000 | 0.1066 | 0.1208 | 0.0000 | 0.0000 | 0.4672 | 0.0000 | EUMED  |
| SPA_WATKINS-007684 | 0.0551 | 0.0000 | 0.0000 | 0.1956 | 0.0666 | 0.0100 | 0.4646 | 0.2080 | EUMED  |
| URU_DAS5-004229    | 0.0112 | 0.0611 | 0.0095 | 0.0036 | 0.0062 | 0.0075 | 0.4644 | 0.4365 | EUMED  |
| ITA_WATKINS-007423 | 0.0090 | 0.0000 | 0.0079 | 0.0000 | 0.1099 | 0.0000 | 0.4618 | 0.4113 | EUMED  |
| CAN_DAS5-001843    | 0.0480 | 0.0000 | 0.0100 | 0.2947 | 0.1132 | 0.0000 | 0.4596 | 0.0745 | EUMED  |
| ARG_DAS5-002370    | 0.0149 | 0.0614 | 0.0121 | 0.0034 | 0.0165 | 0.0066 | 0.4541 | 0.4310 | EUMED  |
| URU_DAS5-002852    | 0.0554 | 0.0086 | 0.0176 | 0.2292 | 0.0201 | 0.0000 | 0.4512 | 0.2180 | EUMED  |
| USA_DAS5-004310    | 0.0000 | 0.0000 | 0.0000 | 0.0539 | 0.4081 | 0.0000 | 0.4464 | 0.0916 | EUMED  |
| BUL_DAS5-003418    | 0.0313 | 0.0000 | 0.0000 | 0.1604 | 0.3646 | 0.0000 | 0.4436 | 0.0000 | EUMED  |
| ARG_DAS5-003070    | 0.0741 | 0.0000 | 0.0000 | 0.2174 | 0.1365 | 0.1285 | 0.4434 | 0.0000 | EUMED  |
| GRE_DAS5-004545    | 0.0286 | 0.0000 | 0.0479 | 0.0017 | 0.2049 | 0.0000 | 0.4349 | 0.2819 | EUMED  |
| AFG_WATKINS-007048 | 0.0000 | 0.0000 | 0.0905 | 0.0000 | 0.1601 | 0.0000 | 0.4255 | 0.3239 | EUMED  |
| ZAM_DAS5-001491    | 0.1650 | 0.0000 | 0.0255 | 0.3250 | 0.0000 | 0.0000 | 0.4236 | 0.0609 | EUMED  |
| USA_DAS5-004161    | 0.0869 | 0.0000 | 0.0000 | 0.3903 | 0.1001 | 0.0000 | 0.4227 | 0.0000 | EUMED  |
| BRA_DAS5-003410    | 0.0847 | 0.0000 | 0.1082 | 0.1596 | 0.0449 | 0.0000 | 0.4154 | 0.1872 | EUMED  |
| ARG_DAS5-001508    | 0.1295 | 0.0000 | 0.0000 | 0.2222 | 0.2341 | 0.0000 | 0.4142 | 0.0000 | EUMED  |
| MEX_WATKINS-007199 | 0.0000 | 0.0000 | 0.1442 | 0.0000 | 0.3356 | 0.0000 | 0.4134 | 0.1068 | EUMED  |
| USA_DAS5-004557    | 0.0722 | 0.0000 | 0.0555 | 0.0000 | 0.3129 | 0.0000 | 0.4131 | 0.1462 | EUMED  |
| USA_DAS5-002311    | 0.0446 | 0.0056 | 0.0622 | 0.0877 | 0.3902 | 0.0000 | 0.4096 | 0.0000 | EUMED  |
| ANG_DAS5-001610    | 0.1627 | 0.0000 | 0.0000 | 0.3894 | 0.0394 | 0.0000 | 0.4085 | 0.0000 | EUMED  |
| ARG_DAS5-002567    | 0.0525 | 0.0000 | 0.1095 | 0.1341 | 0.0625 | 0.0000 | 0.3989 | 0.2426 | EUMED  |
| CRO_DAS5-004640    | 0.0408 | 0.0000 | 0.1155 | 0.2945 | 0.1646 | 0.0000 | 0.3846 | 0.0000 | EUMED  |
| URU_DAS5-004212    | 0.0000 | 0.0000 | 0.0541 | 0.2300 | 0.0099 | 0.0000 | 0.3744 | 0.3316 | EUMED  |
| BUL_DAS5-003423    | 0.0409 | 0.0000 | 0.0116 | 0.2320 | 0.3442 | 0.0000 | 0.3712 | 0.0000 | EUMED  |
| BEL_DAS5-004670    | 0.0000 | 0.0000 | 0.0469 | 0.0830 | 0.2870 | 0.0000 | 0.3650 | 0.2180 | EUMED  |
| URU_DAS5-004217    | 0.0373 | 0.0034 | 0.0863 | 0.2369 | 0.0056 | 0.0029 | 0.3349 | 0.2926 | EUMED  |
| GBR_DAS5-004155    | 0.0713 | 0.2711 | 0.0707 | 0.0855 | 0.0152 | 0.0403 | 0.3130 | 0.1330 | EUMED  |
| IND_WATKINS-007339 | 0.0051 | 0.0000 | 0.2448 | 0.0647 | 0.1281 | 0.0000 | 0.3086 | 0.2486 | EUMED  |
| BEL_DAS5-003370    | 0.0649 | 0.1633 | 0.0809 | 0.0426 | 0.1134 | 0.0000 | 0.3032 | 0.2317 | EUMED  |

| Accessions      | Q1     | Q2     | Q3     | Q4     | Q5     | Q6     | Q7     | Q8     | Subpop |
|-----------------|--------|--------|--------|--------|--------|--------|--------|--------|--------|
| KOR_DAS5-002505 | 0.0000 | 0.0000 | 0.2752 | 0.0000 | 0.2866 | 0.0000 | 0.3022 | 0.1360 | EUMED  |
| PER_DAS5-003903 | 0.0313 | 0.0693 | 0.1639 | 0.2886 | 0.1412 | 0.0053 | 0.3004 | 0.0000 | EUMED  |
| BOS_DAS5-004665 | 0.0229 | 0.0000 | 0.1416 | 0.1689 | 0.1436 | 0.0030 | 0.2789 | 0.2411 | EUMED  |
| ITA_DAS5-001396 | 0.0944 | 0.0038 | 0.2213 | 0.1942 | 0.0937 | 0.0077 | 0.2611 | 0.1238 | EUMED  |
| SPA_DAS5-004018 | 0.0715 | 0.2340 | 0.1123 | 0.0385 | 0.0160 | 0.0181 | 0.2581 | 0.2514 | EUMED  |
| BEL_DAS5-004418 | 0.0731 | 0.1302 | 0.1600 | 0.0000 | 0.1776 | 0.0000 | 0.2518 | 0.2073 | EUMED  |
| USA_DAS5-004691 | 0.0511 | 0.1679 | 0.1878 | 0.0000 | 0.1928 | 0.0000 | 0.2510 | 0.1494 | EUMED  |
| SER_DAS5-003993 | 0.0723 | 0.1690 | 0.1655 | 0.0266 | 0.1991 | 0.0000 | 0.2403 | 0.1272 | EUMED  |
| KEN_DAS5-001271 | 0.0522 | 0.0075 | 0.2230 | 0.2082 | 0.0993 | 0.0047 | 0.2252 | 0.1799 | EUMED  |
| TUR_DAS5-002287 | 0.0000 | 0.9999 | 0.0000 | 0.0000 | 0.0000 | 0.0000 | 0.0000 | 0.0000 | FSV    |
| FSV_DAS5-002301 | 0.0000 | 0.9999 | 0.0000 | 0.0000 | 0.0000 | 0.0000 | 0.0000 | 0.0000 | FSV    |
| FSV_DAS5-002303 | 0.0000 | 0.9999 | 0.0000 | 0.0000 | 0.0000 | 0.0000 | 0.0000 | 0.0000 | FSV    |
| FSV_DAS5-002449 | 0.0000 | 0.9999 | 0.0000 | 0.0000 | 0.0000 | 0.0000 | 0.0000 | 0.0000 | FSV    |
| FSV_DAS5-002471 | 0.0000 | 0.9999 | 0.0000 | 0.0000 | 0.0000 | 0.0000 | 0.0000 | 0.0000 | FSV    |
| FSV_DAS5-002515 | 0.0000 | 0.9999 | 0.0000 | 0.0000 | 0.0000 | 0.0000 | 0.0000 | 0.0000 | FSV    |
| FSV_DAS5-002631 | 0.0000 | 0.9999 | 0.0000 | 0.0000 | 0.0000 | 0.0000 | 0.0000 | 0.0000 | FSV    |
| ITA_DAS5-002933 | 0.0000 | 0.9999 | 0.0000 | 0.0000 | 0.0000 | 0.0000 | 0.0000 | 0.0000 | FSV    |
| FSV_DAS5-002961 | 0.0000 | 0.9999 | 0.0000 | 0.0000 | 0.0000 | 0.0000 | 0.0000 | 0.0000 | FSV    |
| FSV_DAS5-002978 | 0.0000 | 0.9999 | 0.0000 | 0.0000 | 0.0000 | 0.0000 | 0.0000 | 0.0000 | FSV    |
| FSV_DAS5-003094 | 0.0000 | 0.9999 | 0.0000 | 0.0000 | 0.0000 | 0.0000 | 0.0000 | 0.0000 | FSV    |
| AUS_DAS5-000296 | 0.0000 | 0.9999 | 0.0000 | 0.0000 | 0.0000 | 0.0000 | 0.0000 | 0.0000 | FSV    |
| AZE_DAS5-002735 | 0.0000 | 0.9999 | 0.0000 | 0.0000 | 0.0000 | 0.0000 | 0.0000 | 0.0000 | FSV    |
| LEB_DAS5-002454 | 0.0000 | 0.9999 | 0.0000 | 0.0000 | 0.0000 | 0.0000 | 0.0000 | 0.0000 | FSV    |
| POL_DAS5-002338 | 0.0000 | 0.9871 | 0.0000 | 0.0000 | 0.0000 | 0.0128 | 0.0000 | 0.0000 | FSV    |
| FSV_DAS5-002236 | 0.0000 | 0.9686 | 0.0000 | 0.0000 | 0.0000 | 0.0314 | 0.0000 | 0.0000 | FSV    |
| GER_DAS5-002790 | 0.0000 | 0.9644 | 0.0000 | 0.0000 | 0.0000 | 0.0355 | 0.0000 | 0.0000 | FSV    |
| POR_DAS5-002406 | 0.0000 | 0.9432 | 0.0000 | 0.0000 | 0.0000 | 0.0567 | 0.0000 | 0.0000 | FSV    |
| UNK_DAS5-003033 | 0.0000 | 0.9333 | 0.0093 | 0.0000 | 0.0000 | 0.0354 | 0.0000 | 0.0221 | FSV    |
| FSV_DAS5-002519 | 0.0000 | 0.9287 | 0.0000 | 0.0000 | 0.0000 | 0.0712 | 0.0000 | 0.0000 | FSV    |
| FSV_DAS5-003258 | 0.0000 | 0.9281 | 0.0000 | 0.0000 | 0.0000 | 0.0000 | 0.0000 | 0.0718 | FSV    |
| FSV_DAS5-003142 | 0.0000 | 0.9212 | 0.0000 | 0.0000 | 0.0000 | 0.0787 | 0.0000 | 0.0000 | FSV    |
| ALG_DAS5-002458 | 0.0000 | 0.8832 | 0.0000 | 0.0000 | 0.0000 | 0.1167 | 0.0000 | 0.0000 | FSV    |
| IND_DAS5-002138 | 0.0000 | 0.8729 | 0.1096 | 0.0174 | 0.0000 | 0.0000 | 0.0000 | 0.0000 | FSV    |
| FSV_DAS5-002996 | 0.0000 | 0.8629 | 0.0223 | 0.0050 | 0.0000 | 0.0000 | 0.0828 | 0.0270 | FSV    |
| ITA_DAS5-002212 | 0.0000 | 0.8453 | 0.0000 | 0.0000 | 0.0000 | 0.1547 | 0.0000 | 0.0000 | FSV    |
| MON_DAS5-004285 | 0.0000 | 0.8299 | 0.0000 | 0.0000 | 0.0000 | 0.0000 | 0.0748 | 0.0953 | FSV    |
| ITA_DAS5-002199 | 0.0000 | 0.8091 | 0.0000 | 0.0000 | 0.0000 | 0.0000 | 0.0600 | 0.1309 | FSV    |
| AZE_DAS5-003041 | 0.0090 | 0.7971 | 0.0078 | 0.0000 | 0.0808 | 0.1053 | 0.0000 | 0.0000 | FSV    |
| FSV_DAS5-002765 | 0.0000 | 0.7956 | 0.0583 | 0.0000 | 0.0000 | 0.0000 | 0.0000 | 0.1461 | FSV    |
| AUS_DAS5-000425 | 0.0399 | 0.7782 | 0.0000 | 0.0000 | 0.0000 | 0.0000 | 0.1067 | 0.0751 | FSV    |
| ITA_DAS5-002425 | 0.0000 | 0.7222 | 0.0000 | 0.0000 | 0.0000 | 0.2777 | 0.0000 | 0.0000 | FSV    |

| Accessions         | Q1     | Q2     | Q3     | Q4     | Q5     | Q6     | Q7     | Q8     | Subpop |
|--------------------|--------|--------|--------|--------|--------|--------|--------|--------|--------|
| FSV_DAS5-002799    | 0.0000 | 0.6904 | 0.0000 | 0.0000 | 0.3095 | 0.0000 | 0.0000 | 0.0000 | FSV    |
| FSV_DAS5-002740    | 0.0000 | 0.6744 | 0.0000 | 0.0000 | 0.3255 | 0.0000 | 0.0000 | 0.0000 | FSV    |
| SPA_DAS5-002916    | 0.0000 | 0.6640 | 0.0000 | 0.0000 | 0.0390 | 0.1658 | 0.0419 | 0.0893 | FSV    |
| GER_WATKINS-007811 | 0.0000 | 0.6349 | 0.0861 | 0.0000 | 0.0000 | 0.2790 | 0.0000 | 0.0000 | FSV    |
| YEM_DAS5-004244    | 0.0175 | 0.6154 | 0.2016 | 0.0622 | 0.0000 | 0.0663 | 0.0370 | 0.0000 | FSV    |
| ETH_DAS5-001932    | 0.0002 | 0.5840 | 0.3128 | 0.0088 | 0.0616 | 0.0000 | 0.0326 | 0.0000 | FSV    |
| FSV_DAS5-002986    | 0.0000 | 0.5781 | 0.0626 | 0.0095 | 0.0738 | 0.2250 | 0.0511 | 0.0000 | FSV    |
| SPA_DAS5-004007    | 0.0424 | 0.5631 | 0.0788 | 0.0299 | 0.0000 | 0.0000 | 0.2858 | 0.0000 | FSV    |
| IND_DAS5-002802    | 0.0232 | 0.5563 | 0.2608 | 0.0569 | 0.0571 | 0.0000 | 0.0457 | 0.0000 | FSV    |
| MEX_DAS5-001242    | 0.0000 | 0.0000 | 0.0000 | 0.0000 | 0.0000 | 0.0000 | 0.0000 | 0.9999 | MED    |
| ALG_WATKINS-007122 | 0.0000 | 0.0000 | 0.0000 | 0.0000 | 0.0000 | 0.0000 | 0.0000 | 0.9999 | MED    |
| CAN_WATKINS-007650 | 0.0000 | 0.0000 | 0.0000 | 0.0000 | 0.0000 | 0.0000 | 0.0000 | 0.9999 | MED    |
| SPA_WATKINS-007443 | 0.0000 | 0.0000 | 0.0000 | 0.0000 | 0.0000 | 0.0000 | 0.0000 | 0.9999 | MED    |
| ALG_DAS5-001609    | 0.0000 | 0.0000 | 0.0000 | 0.0177 | 0.0000 | 0.0000 | 0.0000 | 0.9822 | MED    |
| TUN_WATKINS-007035 | 0.0000 | 0.0000 | 0.0000 | 0.0000 | 0.0000 | 0.0000 | 0.0408 | 0.9591 | MED    |
| AFG_WATKINS-007117 | 0.0000 | 0.0000 | 0.0041 | 0.0223 | 0.0000 | 0.0000 | 0.0228 | 0.9508 | MED    |
| ISR_DAS5-003704    | 0.0000 | 0.0118 | 0.0167 | 0.0000 | 0.0000 | 0.0278 | 0.0000 | 0.9437 | MED    |
| AUS_WATKINS-007089 | 0.0000 | 0.0000 | 0.0000 | 0.0000 | 0.0000 | 0.0000 | 0.0742 | 0.9257 | MED    |
| PRK_WSC-8-1        | 0.0000 | 0.0318 | 0.0000 | 0.0000 | 0.0000 | 0.0000 | 0.0494 | 0.9188 | MED    |
| TUR_WATKINS-007030 | 0.0000 | 0.0058 | 0.0375 | 0.0000 | 0.0778 | 0.0000 | 0.0000 | 0.8789 | MED    |
| POR_DAS5-002049    | 0.0000 | 0.0631 | 0.0000 | 0.0000 | 0.0000 | 0.0000 | 0.0603 | 0.8765 | MED    |
| ISR_DAS5-001203    | 0.0000 | 0.0543 | 0.0000 | 0.0000 | 0.0000 | 0.0793 | 0.0000 | 0.8663 | MED    |
| FSV_DAS5-002447    | 0.0000 | 0.0000 | 0.0158 | 0.0428 | 0.0000 | 0.0237 | 0.0553 | 0.8624 | MED    |
| SPA_WATKINS-007127 | 0.0008 | 0.0000 | 0.0167 | 0.0000 | 0.0359 | 0.0000 | 0.0896 | 0.8570 | MED    |
| GRE_WATKINS-007090 | 0.0000 | 0.0614 | 0.0000 | 0.0000 | 0.0000 | 0.0877 | 0.0000 | 0.8508 | MED    |
| SPA_WATKINS-007187 | 0.0116 | 0.0794 | 0.0386 | 0.0000 | 0.0195 | 0.0086 | 0.0000 | 0.8422 | MED    |
| MOR_DAS5-003835    | 0.0000 | 0.0000 | 0.1226 | 0.0268 | 0.0088 | 0.0000 | 0.0000 | 0.8417 | MED    |
| SYR_WATKINS-007009 | 0.0000 | 0.0000 | 0.0892 | 0.0000 | 0.0628 | 0.0149 | 0.0000 | 0.8331 | MED    |
| CYP_WATKINS-007826 | 0.0000 | 0.0126 | 0.1196 | 0.0000 | 0.0485 | 0.0000 | 0.0000 | 0.8192 | MED    |
| CYP_WSC-7-4        | 0.0000 | 0.0000 | 0.0472 | 0.0000 | 0.0018 | 0.1396 | 0.0000 | 0.8113 | MED    |
| SPA_WATKINS-007188 | 0.0631 | 0.0723 | 0.0043 | 0.0000 | 0.0000 | 0.0000 | 0.0579 | 0.8024 | MED    |
| SPA_DAS5-004012    | 0.0000 | 0.0000 | 0.0000 | 0.0000 | 0.1497 | 0.0020 | 0.0472 | 0.8011 | MED    |
| MEX_Cltr-2804      | 0.0102 | 0.0164 | 0.0065 | 0.0187 | 0.0208 | 0.0000 | 0.1272 | 0.8001 | MED    |
| KEN_DAS5-001809    | 0.0000 | 0.1162 | 0.0079 | 0.0000 | 0.0000 | 0.0692 | 0.0108 | 0.7959 | MED    |
| SPA_DAS5-004010    | 0.0000 | 0.0307 | 0.0130 | 0.0000 | 0.1209 | 0.0000 | 0.0477 | 0.7877 | MED    |
| POR_DAS5-002104    | 0.0000 | 0.0434 | 0.0000 | 0.0139 | 0.0398 | 0.0000 | 0.1236 | 0.7793 | MED    |
| GRE_DAS5-001641    | 0.0112 | 0.0000 | 0.0000 | 0.0439 | 0.0765 | 0.0932 | 0.0000 | 0.7752 | MED    |
| CYP_DAS5-003480    | 0.0185 | 0.0000 | 0.1060 | 0.0000 | 0.0626 | 0.0000 | 0.0397 | 0.7732 | MED    |
| IND_WATKINS-007561 | 0.0321 | 0.0000 | 0.0017 | 0.0000 | 0.1429 | 0.0000 | 0.0752 | 0.7480 | MED    |
| GRE_WSC-7-3        | 0.0000 | 0.0217 | 0.0000 | 0.0000 | 0.0326 | 0.0000 | 0.2069 | 0.7386 | MED    |
| SPA_WATKINS-007558 | 0.0000 | 0.0000 | 0.0000 | 0.0000 | 0.0947 | 0.0000 | 0.1741 | 0.7312 | MED    |

| Accessions         | Q1     | Q2     | Q3     | Q4     | Q5     | Q6     | Q7     | Q8     | Subpop |
|--------------------|--------|--------|--------|--------|--------|--------|--------|--------|--------|
| MOR_DAS5-004265    | 0.0000 | 0.0321 | 0.2282 | 0.0000 | 0.0088 | 0.0000 | 0.0000 | 0.7309 | MED    |
| SPA_WATKINS-007677 | 0.0000 | 0.0000 | 0.0000 | 0.0000 | 0.1529 | 0.0000 | 0.1231 | 0.7240 | MED    |
| POR_DAS5-001924    | 0.0000 | 0.0851 | 0.0000 | 0.0000 | 0.0000 | 0.0000 | 0.1959 | 0.7189 | MED    |
| AUS_WATKINS-007145 | 0.0000 | 0.0000 | 0.0000 | 0.1854 | 0.0070 | 0.0000 | 0.1012 | 0.7064 | MED    |
| SPA_DAS5-004020    | 0.0000 | 0.0226 | 0.0000 | 0.0000 | 0.0000 | 0.0000 | 0.2723 | 0.7051 | MED    |
| AUS_WATKINS-007299 | 0.0000 | 0.0000 | 0.0000 | 0.0000 | 0.2162 | 0.0000 | 0.0879 | 0.6959 | MED    |
| SPA_DAS5-001212    | 0.0196 | 0.1264 | 0.0243 | 0.0000 | 0.0000 | 0.0010 | 0.1358 | 0.6929 | MED    |
| URU_PI-43355       | 0.0011 | 0.0063 | 0.0040 | 0.0000 | 0.0000 | 0.0000 | 0.3251 | 0.6635 | MED    |
| ECU_DAS5-003501    | 0.0157 | 0.1256 | 0.0585 | 0.0054 | 0.0000 | 0.1338 | 0.0000 | 0.6611 | MED    |
| BRA_WSC-8-9        | 0.0000 | 0.0000 | 0.0000 | 0.0360 | 0.0000 | 0.0000 | 0.3029 | 0.6610 | MED    |
| GRE_WATKINS-007077 | 0.0000 | 0.0110 | 0.0000 | 0.0263 | 0.0705 | 0.0000 | 0.2361 | 0.6561 | MED    |
| IND_WATKINS-007802 | 0.0014 | 0.0015 | 0.0052 | 0.0000 | 0.0000 | 0.0000 | 0.3392 | 0.6527 | MED    |
| POL_DAS5-002870    | 0.0000 | 0.0000 | 0.0000 | 0.0000 | 0.0000 | 0.0000 | 0.3506 | 0.6494 | MED    |
| GRE_WATKINS-007001 | 0.0000 | 0.0142 | 0.0000 | 0.0000 | 0.0000 | 0.0022 | 0.3358 | 0.6477 | MED    |
| IRQ_WATKINS-007638 | 0.0270 | 0.0105 | 0.0655 | 0.0000 | 0.0000 | 0.0000 | 0.2505 | 0.6465 | MED    |
| AUS_WATKINS-007156 | 0.0000 | 0.0000 | 0.0000 | 0.0170 | 0.0415 | 0.0000 | 0.2966 | 0.6449 | MED    |
| EGY_WATKINS-007542 | 0.0000 | 0.0000 | 0.0000 | 0.0727 | 0.1378 | 0.0000 | 0.1473 | 0.6421 | MED    |
| TUN_DAS5-001935    | 0.0000 | 0.0135 | 0.1086 | 0.0000 | 0.1247 | 0.0358 | 0.0764 | 0.6411 | MED    |
| SPA_WATKINS-007455 | 0.0000 | 0.0000 | 0.0000 | 0.0000 | 0.0294 | 0.0000 | 0.3314 | 0.6392 | MED    |
| AUS_WATKINS-007623 | 0.0000 | 0.0000 | 0.0000 | 0.0916 | 0.0000 | 0.0000 | 0.2726 | 0.6357 | MED    |
| GRE_WATKINS-007002 | 0.0000 | 0.0000 | 0.0731 | 0.0984 | 0.0977 | 0.0000 | 0.0952 | 0.6355 | MED    |
| POR_DAS5-003928    | 0.0321 | 0.2447 | 0.0067 | 0.0000 | 0.0000 | 0.0000 | 0.0860 | 0.6305 | MED    |
| GRE_WATKINS-007093 | 0.0000 | 0.0000 | 0.0000 | 0.0000 | 0.0000 | 0.0000 | 0.3731 | 0.6269 | MED    |
| POR_WSC-8-2        | 0.0182 | 0.0000 | 0.0000 | 0.0067 | 0.0000 | 0.0000 | 0.3513 | 0.6238 | MED    |
| FSV_DAS5-003176    | 0.0000 | 0.0000 | 0.0000 | 0.0000 | 0.1184 | 0.0000 | 0.2707 | 0.6109 | MED    |
| MOR_DAS5-004663    | 0.0000 | 0.0570 | 0.0941 | 0.0000 | 0.1772 | 0.0615 | 0.0000 | 0.6101 | MED    |
| POR_DAS5-003925    | 0.0000 | 0.1257 | 0.0000 | 0.0000 | 0.0000 | 0.0000 | 0.2674 | 0.6068 | MED    |
| ANG_WSC-8-8        | 0.0000 | 0.0049 | 0.0335 | 0.2411 | 0.0000 | 0.0000 | 0.1281 | 0.5924 | MED    |
| PER_DAS5-004698    | 0.0000 | 0.1343 | 0.0000 | 0.0000 | 0.0000 | 0.2119 | 0.0849 | 0.5689 | MED    |
| TUN_WATKINS-007799 | 0.0000 | 0.0283 | 0.0991 | 0.0642 | 0.0000 | 0.0893 | 0.1517 | 0.5674 | MED    |
| ARG_WATKINS-007070 | 0.0084 | 0.1049 | 0.0081 | 0.0074 | 0.1699 | 0.0481 | 0.0864 | 0.5669 | MED    |
| ANG_DAS5-001276    | 0.0000 | 0.0140 | 0.0420 | 0.2327 | 0.0000 | 0.0000 | 0.1500 | 0.5613 | MED    |
| GUA_WSC-8-3        | 0.0078 | 0.0560 | 0.0038 | 0.0000 | 0.0909 | 0.0000 | 0.2857 | 0.5558 | MED    |
| CRO_DAS5-004316    | 0.0000 | 0.0000 | 0.0000 | 0.0000 | 0.2661 | 0.0000 | 0.1808 | 0.5531 | MED    |
| TUR_WSC-8-4        | 0.0000 | 0.0504 | 0.2531 | 0.0000 | 0.1020 | 0.0466 | 0.0000 | 0.5479 | MED    |
| AUS_WATKINS-007148 | 0.0000 | 0.0000 | 0.0254 | 0.0000 | 0.2915 | 0.0000 | 0.1452 | 0.5379 | MED    |
| ARG_DAS5-003296    | 0.0365 | 0.0550 | 0.0000 | 0.1375 | 0.1242 | 0.1113 | 0.0000 | 0.5355 | MED    |
| GRE_WATKINS-007088 | 0.0000 | 0.0000 | 0.0000 | 0.0000 | 0.0457 | 0.0000 | 0.4234 | 0.5308 | MED    |
| AUS_WATKINS-007056 | 0.0000 | 0.0244 | 0.0212 | 0.0000 | 0.2401 | 0.0042 | 0.1821 | 0.5280 | MED    |
| GUA_DAS5-003601    | 0.0342 | 0.1906 | 0.0832 | 0.0007 | 0.0266 | 0.0000 | 0.1442 | 0.5205 | MED    |
| BRA_DAS5-003134    | 0.0646 | 0.1871 | 0.0197 | 0.0313 | 0.0520 | 0.0121 | 0.1146 | 0.5185 | MED    |

| Accessions         | Q1     | Q2     | Q3     | Q4     | Q5     | Q6     | Q7     | Q8     | Subpop |
|--------------------|--------|--------|--------|--------|--------|--------|--------|--------|--------|
| CYP_DAS5-001320    | 0.0295 | 0.0553 | 0.0499 | 0.1108 | 0.0466 | 0.0000 | 0.1922 | 0.5156 | MED    |
| POR_WATKINS-007494 | 0.0620 | 0.0000 | 0.0792 | 0.0000 | 0.0000 | 0.0000 | 0.3435 | 0.5152 | MED    |
| SPA_WATKINS-007520 | 0.0000 | 0.0000 | 0.0000 | 0.0000 | 0.2300 | 0.0000 | 0.2566 | 0.5133 | MED    |
| ZAF_DAS5-002317    | 0.0000 | 0.0000 | 0.0000 | 0.2597 | 0.0000 | 0.0000 | 0.2277 | 0.5125 | MED    |
| GUA_DAS5-004664    | 0.0187 | 0.0492 | 0.1056 | 0.0837 | 0.0980 | 0.0000 | 0.1337 | 0.5111 | MED    |
| IRQ_WATKINS-007641 | 0.0000 | 0.0000 | 0.0000 | 0.1773 | 0.2678 | 0.0000 | 0.0462 | 0.5087 | MED    |
| NEW_DAS5-002463    | 0.0371 | 0.1609 | 0.0328 | 0.0068 | 0.0551 | 0.0000 | 0.2016 | 0.5058 | MED    |
| POR_WATKINS-007497 | 0.0212 | 0.2366 | 0.0067 | 0.0013 | 0.0027 | 0.0485 | 0.1827 | 0.5004 | MED    |
| MOR_DAS5-003849    | 0.0000 | 0.0089 | 0.0393 | 0.1217 | 0.0000 | 0.0023 | 0.3354 | 0.4924 | MED    |
| FSV_DAS5-002708    | 0.0052 | 0.0129 | 0.0000 | 0.3437 | 0.0963 | 0.0088 | 0.0442 | 0.4889 | MED    |
| TUR_DAS5-004483    | 0.0000 | 0.0598 | 0.2425 | 0.0000 | 0.1064 | 0.1033 | 0.0000 | 0.4881 | MED    |
| USA_DAS5-001731    | 0.0504 | 0.0266 | 0.0179 | 0.0019 | 0.1866 | 0.0000 | 0.2301 | 0.4865 | MED    |
| POR_DAS5-004676    | 0.0381 | 0.2750 | 0.0077 | 0.0000 | 0.0000 | 0.0314 | 0.1643 | 0.4836 | MED    |
| FSV_DAS5-002981    | 0.0000 | 0.0000 | 0.0000 | 0.2536 | 0.2315 | 0.0000 | 0.0328 | 0.4821 | MED    |
| LEB_DAS5-004337    | 0.0000 | 0.0005 | 0.0000 | 0.0831 | 0.0260 | 0.0000 | 0.4111 | 0.4793 | MED    |
| URU_DAS5-001755    | 0.0000 | 0.0000 | 0.0864 | 0.1466 | 0.1501 | 0.0000 | 0.1437 | 0.4732 | MED    |
| TUN_DAS5-001399    | 0.0000 | 0.0775 | 0.0352 | 0.1553 | 0.1749 | 0.0860 | 0.0000 | 0.4711 | MED    |
| URU_DAS5-001042    | 0.0132 | 0.0000 | 0.0656 | 0.0674 | 0.0000 | 0.0000 | 0.3836 | 0.4703 | MED    |
| ALG_DAS5-004460    | 0.0000 | 0.0351 | 0.4548 | 0.0000 | 0.0000 | 0.0457 | 0.0000 | 0.4643 | MED    |
| ITA_DAS5-004695    | 0.0000 | 0.0120 | 0.0000 | 0.0725 | 0.0165 | 0.0000 | 0.4408 | 0.4581 | MED    |
| FSV_DAS5-002165    | 0.0000 | 0.0000 | 0.0000 | 0.1287 | 0.0365 | 0.0000 | 0.3772 | 0.4576 | MED    |
| FSV_DAS5-002351    | 0.0000 | 0.0000 | 0.0000 | 0.0000 | 0.2139 | 0.0000 | 0.3324 | 0.4537 | MED    |
| SPA_WATKINS-007430 | 0.0000 | 0.0000 | 0.0481 | 0.0000 | 0.1778 | 0.0000 | 0.3220 | 0.4521 | MED    |
| SYR_DAS5-004059    | 0.0000 | 0.0000 | 0.3276 | 0.0000 | 0.2140 | 0.0069 | 0.0000 | 0.4515 | MED    |
| CHN_WATKINS-007261 | 0.0077 | 0.0051 | 0.1507 | 0.0291 | 0.0918 | 0.0000 | 0.2698 | 0.4457 | MED    |
| CHN_WATKINS-007202 | 0.0000 | 0.0000 | 0.0000 | 0.2108 | 0.0331 | 0.0000 | 0.3131 | 0.4430 | MED    |
| ARG_DAS5-002171    | 0.0000 | 0.0000 | 0.0000 | 0.1603 | 0.1346 | 0.0000 | 0.2626 | 0.4424 | MED    |
| IND_WATKINS-007388 | 0.0000 | 0.0000 | 0.3383 | 0.0685 | 0.1144 | 0.0000 | 0.0493 | 0.4295 | MED    |
| ZIM_WATKINS-007692 | 0.0000 | 0.0000 | 0.3209 | 0.0000 | 0.1142 | 0.0000 | 0.1584 | 0.4065 | MED    |
| MEX_WATKINS-007221 | 0.0000 | 0.0260 | 0.0631 | 0.1164 | 0.1315 | 0.0914 | 0.1667 | 0.4050 | MED    |
| SWE_DAS5-004036    | 0.0306 | 0.0590 | 0.0256 | 0.0254 | 0.0422 | 0.0294 | 0.3901 | 0.3977 | MED    |
| IRN_DAS5-003670    | 0.0000 | 0.0000 | 0.3080 | 0.0000 | 0.3031 | 0.0000 | 0.0000 | 0.3889 | MED    |
| ZAF_DAS5-004657    | 0.0000 | 0.0000 | 0.0418 | 0.2871 | 0.0899 | 0.0000 | 0.1964 | 0.3848 | MED    |
| UKR_DAS5-001791    | 0.0568 | 0.0000 | 0.0915 | 0.0133 | 0.3319 | 0.0000 | 0.1242 | 0.3824 | MED    |
| IRQ_WSC-7-2        | 0.0000 | 0.0000 | 0.4007 | 0.0000 | 0.2188 | 0.0000 | 0.0000 | 0.3804 | MED    |
| POR_DAS5-001415    | 0.0000 | 0.0000 | 0.0000 | 0.0000 | 0.0000 | 0.0000 | 0.6214 | 0.3785 | MED    |
| SPA_DAS5-004493    | 0.0000 | 0.0341 | 0.0453 | 0.0000 | 0.1846 | 0.0000 | 0.3574 | 0.3785 | MED    |
| IRQ_WATKINS-007640 | 0.0000 | 0.0306 | 0.3609 | 0.0378 | 0.1733 | 0.0134 | 0.0077 | 0.3762 | MED    |
| CRO_DAS5-003478    | 0.0000 | 0.0062 | 0.0370 | 0.0000 | 0.2423 | 0.0221 | 0.3163 | 0.3762 | MED    |
| BOS_DAS5-003388    | 0.0056 | 0.0000 | 0.0039 | 0.0210 | 0.2275 | 0.0023 | 0.3660 | 0.3737 | MED    |
| NOR_DAS5-001859    | 0.0063 | 0.0035 | 0.1372 | 0.2032 | 0.2692 | 0.0085 | 0.0000 | 0.3720 | MED    |

| Accessions         | Q1     | Q2     | Q3     | Q4     | Q5     | Q6     | Q7     | Q8     | Subpop |
|--------------------|--------|--------|--------|--------|--------|--------|--------|--------|--------|
| ARG_DAS5-002565    | 0.1155 | 0.0058 | 0.0000 | 0.3026 | 0.1761 | 0.0000 | 0.0310 | 0.3690 | MED    |
| NET_DAS5-001291    | 0.0367 | 0.1191 | 0.0071 | 0.0868 | 0.2591 | 0.0000 | 0.1284 | 0.3628 | MED    |
| PER_DAS5-003904    | 0.0227 | 0.0000 | 0.1440 | 0.2604 | 0.0000 | 0.0000 | 0.2161 | 0.3569 | MED    |
| JAP_DAS5-003726    | 0.0000 | 0.1358 | 0.0000 | 0.0894 | 0.2562 | 0.1369 | 0.0275 | 0.3542 | MED    |
| AUS_WATKINS-007017 | 0.0131 | 0.0137 | 0.1786 | 0.1073 | 0.0000 | 0.0055 | 0.3290 | 0.3528 | MED    |
| ARG_DAS5-002568    | 0.0000 | 0.0513 | 0.0000 | 0.1489 | 0.2598 | 0.0554 | 0.1411 | 0.3435 | MED    |
| ARG_DAS5-001845    | 0.0000 | 0.0550 | 0.0478 | 0.2282 | 0.1661 | 0.1696 | 0.0000 | 0.3333 | MED    |
| AUS_DAS5-001910    | 0.0248 | 0.0312 | 0.1717 | 0.2537 | 0.1883 | 0.0000 | 0.0004 | 0.3299 | MED    |
| CHN_WATKINS-007246 | 0.0006 | 0.0007 | 0.1502 | 0.0104 | 0.2666 | 0.0192 | 0.2370 | 0.3153 | MED    |
| ROM_DAS5-002087    | 0.0000 | 0.0000 | 0.1822 | 0.2482 | 0.0827 | 0.0064 | 0.1816 | 0.2990 | MED    |
| FSV_DAS5-002700    | 0.0918 | 0.0328 | 0.2076 | 0.1277 | 0.0543 | 0.0434 | 0.1623 | 0.2802 | MED    |
| PAK_Cltr-15134     | 0.0000 | 0.0000 | 0.9999 | 0.0000 | 0.0000 | 0.0000 | 0.0000 | 0.0000 | OLDWP  |
| BUR_DAS5-001007    | 0.0000 | 0.0000 | 0.9999 | 0.0000 | 0.0000 | 0.0000 | 0.0000 | 0.0000 | OLDWP  |
| BUR_DAS5-001521    | 0.0000 | 0.0000 | 0.9999 | 0.0000 | 0.0000 | 0.0000 | 0.0000 | 0.0000 | OLDWP  |
| IND_DAS5-001550    | 0.0000 | 0.0000 | 0.9999 | 0.0000 | 0.0000 | 0.0000 | 0.0000 | 0.0000 | OLDWP  |
| OMA_DAS5-001657    | 0.0000 | 0.0000 | 0.9999 | 0.0000 | 0.0000 | 0.0000 | 0.0000 | 0.0000 | OLDWP  |
| EGY_DAS5-002464    | 0.0000 | 0.0000 | 0.9999 | 0.0000 | 0.0000 | 0.0000 | 0.0000 | 0.0000 | OLDWP  |
| FSV_DAS5-002959    | 0.0000 | 0.0000 | 0.9999 | 0.0000 | 0.0000 | 0.0000 | 0.0000 | 0.0000 | OLDWP  |
| AFG_DAS5-003279    | 0.0000 | 0.0000 | 0.9999 | 0.0000 | 0.0000 | 0.0000 | 0.0000 | 0.0000 | OLDWP  |
| CHN_DAS5-003455    | 0.0000 | 0.0000 | 0.9999 | 0.0000 | 0.0000 | 0.0000 | 0.0000 | 0.0000 | OLDWP  |
| IRN_DAS5-003690    | 0.0000 | 0.0000 | 0.9999 | 0.0000 | 0.0000 | 0.0000 | 0.0000 | 0.0000 | OLDWP  |
| ISR_PI-94567       | 0.0000 | 0.0000 | 0.9999 | 0.0000 | 0.0000 | 0.0000 | 0.0000 | 0.0000 | OLDWP  |
| UZB_PI-9791        | 0.0000 | 0.0000 | 0.9999 | 0.0000 | 0.0000 | 0.0000 | 0.0000 | 0.0000 | OLDWP  |
| CHN_WATKINS-007210 | 0.0000 | 0.0000 | 0.9999 | 0.0000 | 0.0000 | 0.0000 | 0.0000 | 0.0000 | OLDWP  |
| MEX_WATKINS-007251 | 0.0000 | 0.0000 | 0.9999 | 0.0000 | 0.0000 | 0.0000 | 0.0000 | 0.0000 | OLDWP  |
| ROM_WATKINS-007510 | 0.0000 | 0.0000 | 0.9999 | 0.0000 | 0.0000 | 0.0000 | 0.0000 | 0.0000 | OLDWP  |
| PAK_DAS5-001341    | 0.0000 | 0.0000 | 0.9999 | 0.0000 | 0.0000 | 0.0000 | 0.0000 | 0.0000 | OLDWP  |
| ANG_DAS5-001803    | 0.0000 | 0.0000 | 0.9999 | 0.0000 | 0.0000 | 0.0000 | 0.0000 | 0.0000 | OLDWP  |
| FSV_DAS5-003245    | 0.0000 | 0.0000 | 0.9999 | 0.0000 | 0.0000 | 0.0000 | 0.0000 | 0.0000 | OLDWP  |
| IRQ_WATKINS-007702 | 0.0000 | 0.0000 | 0.9999 | 0.0000 | 0.0000 | 0.0000 | 0.0000 | 0.0000 | OLDWP  |
| PAR_DAS5-001524    | 0.0000 | 0.0000 | 0.9999 | 0.0000 | 0.0000 | 0.0000 | 0.0000 | 0.0000 | OLDWP  |
| UZB_DAS5-001984    | 0.0000 | 0.0000 | 0.9999 | 0.0000 | 0.0000 | 0.0000 | 0.0000 | 0.0000 | OLDWP  |
| TAJ_DAS5-001916    | 0.0000 | 0.0000 | 0.9999 | 0.0000 | 0.0000 | 0.0000 | 0.0000 | 0.0000 | OLDWP  |
| UZB_DAS5-001577    | 0.0000 | 0.0000 | 0.9984 | 0.0000 | 0.0000 | 0.0000 | 0.0000 | 0.0015 | OLDWP  |
| CHN_WATKINS-007220 | 0.0017 | 0.0000 | 0.9982 | 0.0000 | 0.0000 | 0.0000 | 0.0000 | 0.0000 | OLDWP  |
| CHN_ChineseSpring  | 0.0026 | 0.0000 | 0.9974 | 0.0000 | 0.0000 | 0.0000 | 0.0000 | 0.0000 | OLDWP  |
| NEP_DAS5-002811    | 0.0000 | 0.0000 | 0.9912 | 0.0000 | 0.0088 | 0.0000 | 0.0000 | 0.0000 | OLDWP  |
| IRN_DAS5-003654    | 0.0000 | 0.0000 | 0.9896 | 0.0000 | 0.0000 | 0.0104 | 0.0000 | 0.0000 | OLDWP  |
| BHU_WSC-4-6        | 0.0000 | 0.0000 | 0.9877 | 0.0122 | 0.0000 | 0.0000 | 0.0000 | 0.0000 | OLDWP  |
| AFG_DAS5-004674    | 0.0144 | 0.0000 | 0.9855 | 0.0000 | 0.0000 | 0.0000 | 0.0000 | 0.0000 | OLDWP  |
| AFG_WATKINS-007049 | 0.0000 | 0.0122 | 0.9841 | 0.0000 | 0.0034 | 0.0003 | 0.0000 | 0.0000 | OLDWP  |



| Accessions         | Q1     | Q2     | Q3     | Q4     | Q5     | Q6     | Q7     | Q8     | Subpop |
|--------------------|--------|--------|--------|--------|--------|--------|--------|--------|--------|
| AFG_WSC-4-2        | 0.0000 | 0.0000 | 0.9808 | 0.0000 | 0.0191 | 0.0000 | 0.0000 | 0.0000 | OLDWP  |
| MWI_PI-61693       | 0.0000 | 0.0153 | 0.9798 | 0.0049 | 0.0000 | 0.0000 | 0.0000 | 0.0000 | OLDWP  |
| TKM_WSC-7-1        | 0.0000 | 0.0000 | 0.9780 | 0.0000 | 0.0000 | 0.0000 | 0.0000 | 0.0220 | OLDWP  |
| COL_DAS5-001666    | 0.0000 | 0.0000 | 0.9748 | 0.0000 | 0.0000 | 0.0000 | 0.0000 | 0.0252 | OLDWP  |
| JAP_DAS5-003119    | 0.0261 | 0.0000 | 0.9738 | 0.0000 | 0.0000 | 0.0000 | 0.0000 | 0.0000 | OLDWP  |
| PHI_Cltr-4175      | 0.0263 | 0.0000 | 0.9736 | 0.0000 | 0.0000 | 0.0000 | 0.0000 | 0.0000 | OLDWP  |
| FSV_WATKINS-007547 | 0.0000 | 0.0000 | 0.9731 | 0.0000 | 0.0268 | 0.0000 | 0.0000 | 0.0000 | OLDWP  |
| AFG_DAS5-004583    | 0.0000 | 0.0000 | 0.9700 | 0.0000 | 0.0000 | 0.0000 | 0.0299 | 0.0000 | OLDWP  |
| UNK_DAS5-004209    | 0.0000 | 0.0000 | 0.9660 | 0.0000 | 0.0022 | 0.0000 | 0.0318 | 0.0000 | OLDWP  |
| AFG_WSC-4-9        | 0.0177 | 0.0000 | 0.9659 | 0.0000 | 0.0000 | 0.0000 | 0.0163 | 0.0000 | OLDWP  |
| IDN_DAS5-001690    | 0.0121 | 0.0000 | 0.9653 | 0.0183 | 0.0000 | 0.0043 | 0.0000 | 0.0000 | OLDWP  |
| BOL_DAS5-001094    | 0.0090 | 0.0000 | 0.9617 | 0.0292 | 0.0000 | 0.0000 | 0.0000 | 0.0000 | OLDWP  |
| FSV_WATKINS-007827 | 0.0019 | 0.0000 | 0.9560 | 0.0000 | 0.0000 | 0.0000 | 0.0000 | 0.0420 | OLDWP  |
| FSV_DAS5-002819    | 0.0000 | 0.0000 | 0.9543 | 0.0456 | 0.0000 | 0.0000 | 0.0000 | 0.0000 | OLDWP  |
| NEP_WSC-4-3        | 0.0084 | 0.0000 | 0.9515 | 0.0400 | 0.0000 | 0.0000 | 0.0000 | 0.0000 | OLDWP  |
| UZB_DAS5-004240    | 0.0000 | 0.0043 | 0.9505 | 0.0137 | 0.0000 | 0.0000 | 0.0222 | 0.0093 | OLDWP  |
| NEP_WSC-5-13       | 0.0152 | 0.0000 | 0.9328 | 0.0520 | 0.0000 | 0.0000 | 0.0000 | 0.0000 | OLDWP  |
| IRQ_WATKINS-007708 | 0.0000 | 0.0000 | 0.9119 | 0.0000 | 0.0196 | 0.0000 | 0.0153 | 0.0532 | OLDWP  |
| BUL_DAS5-001154    | 0.0000 | 0.0000 | 0.9058 | 0.0000 | 0.0389 | 0.0000 | 0.0070 | 0.0484 | OLDWP  |
| FSV_DAS5-002641    | 0.0942 | 0.0000 | 0.9048 | 0.0010 | 0.0000 | 0.0000 | 0.0000 | 0.0000 | OLDWP  |
| POR_DAS5-001847    | 0.0000 | 0.0049 | 0.9017 | 0.0000 | 0.0348 | 0.0000 | 0.0041 | 0.0544 | OLDWP  |
| SUD_WSC-4-5        | 0.0000 | 0.0121 | 0.8890 | 0.0037 | 0.0363 | 0.0000 | 0.0339 | 0.0249 | OLDWP  |
| AFG_DAS5-003288    | 0.0000 | 0.0000 | 0.8702 | 0.0000 | 0.0000 | 0.0000 | 0.0000 | 0.1297 | OLDWP  |
| CHN_WATKINS-007263 | 0.0653 | 0.0105 | 0.8626 | 0.0284 | 0.0000 | 0.0117 | 0.0214 | 0.0000 | OLDWP  |
| UZB_DAS5-001540    | 0.0031 | 0.0000 | 0.8556 | 0.0000 | 0.0300 | 0.0000 | 0.0238 | 0.0875 | OLDWP  |
| FSV_DAS5-003026    | 0.0087 | 0.0178 | 0.8552 | 0.0000 | 0.0043 | 0.0000 | 0.0000 | 0.1140 | OLDWP  |
| IRN_DAS5-003660    | 0.0088 | 0.0095 | 0.8478 | 0.0000 | 0.0681 | 0.0000 | 0.0348 | 0.0310 | OLDWP  |
| IRN_DAS5-003689    | 0.0038 | 0.0237 | 0.8390 | 0.0000 | 0.0000 | 0.0000 | 0.0480 | 0.0854 | OLDWP  |
| AUT_DAS5-001116    | 0.0036 | 0.0182 | 0.8365 | 0.0000 | 0.0000 | 0.0000 | 0.0000 | 0.1417 | OLDWP  |
| TAJ_DAS5-004406    | 0.0000 | 0.0000 | 0.8202 | 0.0000 | 0.0308 | 0.0000 | 0.0000 | 0.1489 | OLDWP  |
| JAP_DAS5-001696    | 0.1173 | 0.0000 | 0.8196 | 0.0000 | 0.0000 | 0.0000 | 0.0000 | 0.0631 | OLDWP  |
| TAN_DAS5-001205    | 0.0000 | 0.0288 | 0.8124 | 0.0000 | 0.0098 | 0.0000 | 0.0000 | 0.1490 | OLDWP  |
| CHA_DAS5-001251    | 0.0000 | 0.0296 | 0.8086 | 0.0000 | 0.0085 | 0.0000 | 0.0000 | 0.1532 | OLDWP  |
| SYR_DAS5-001152    | 0.0014 | 0.0000 | 0.8032 | 0.0000 | 0.0604 | 0.0000 | 0.0000 | 0.1349 | OLDWP  |
| FSV_DAS5-002350    | 0.0000 | 0.0000 | 0.8007 | 0.0000 | 0.0609 | 0.0000 | 0.0000 | 0.1384 | OLDWP  |
| USA_DAS5-001872    | 0.1010 | 0.0000 | 0.8006 | 0.0000 | 0.0000 | 0.0000 | 0.0000 | 0.0984 | OLDWP  |
| JOR_PI-283147      | 0.0000 | 0.0000 | 0.7880 | 0.1001 | 0.0327 | 0.0000 | 0.0000 | 0.0791 | OLDWP  |
| YEM_DAS5-004256    | 0.0000 | 0.0260 | 0.7826 | 0.0000 | 0.0126 | 0.0069 | 0.0000 | 0.1719 | OLDWP  |
| FSV_WATKINS-007789 | 0.0000 | 0.0000 | 0.7770 | 0.0000 | 0.1778 | 0.0000 | 0.0296 | 0.0156 | OLDWP  |
| YEM_DAS5-004253    | 0.0000 | 0.0217 | 0.7749 | 0.0000 | 0.0412 | 0.0000 | 0.0000 | 0.1622 | OLDWP  |
| IND_WATKINS-007581 | 0.0000 | 0.0485 | 0.7653 | 0.0000 | 0.0733 | 0.0000 | 0.0000 | 0.1129 | OLDWP  |

| Accessions         | Q1     | Q2     | Q3     | Q4     | Q5     | Q6     | Q7     | Q8     | Subpop |
|--------------------|--------|--------|--------|--------|--------|--------|--------|--------|--------|
| AFG_PI-268466      | 0.0000 | 0.0476 | 0.7642 | 0.0000 | 0.0822 | 0.0000 | 0.0000 | 0.1060 | OLDWP  |
| NIG_DAS5-003881    | 0.0092 | 0.0296 | 0.7620 | 0.0000 | 0.0283 | 0.0000 | 0.0000 | 0.1709 | OLDWP  |
| IND_WATKINS-007606 | 0.0070 | 0.0049 | 0.7590 | 0.0427 | 0.0246 | 0.0000 | 0.0341 | 0.1278 | OLDWP  |
| IRQ_WSC-7-8        | 0.0000 | 0.0170 | 0.7449 | 0.0000 | 0.0818 | 0.0192 | 0.0000 | 0.1371 | OLDWP  |
| IRQ_WATKINS-007470 | 0.0000 | 0.0000 | 0.7361 | 0.0000 | 0.2201 | 0.0000 | 0.0010 | 0.0427 | OLDWP  |
| YEM_DAS5-001244    | 0.0433 | 0.0000 | 0.7305 | 0.1594 | 0.0211 | 0.0000 | 0.0456 | 0.0000 | OLDWP  |
| FSV_DAS5-002419    | 0.0000 | 0.0000 | 0.7291 | 0.0000 | 0.1908 | 0.0000 | 0.0000 | 0.0801 | OLDWP  |
| IND_WATKINS-007401 | 0.0000 | 0.0079 | 0.7171 | 0.0192 | 0.1081 | 0.0025 | 0.1451 | 0.0000 | OLDWP  |
| KOR_DAS5-001100    | 0.0038 | 0.0000 | 0.6896 | 0.0000 | 0.1569 | 0.0000 | 0.1497 | 0.0000 | OLDWP  |
| IRN_DAS5-001458    | 0.0000 | 0.0395 | 0.6797 | 0.0000 | 0.0866 | 0.0000 | 0.0392 | 0.1549 | OLDWP  |
| ETH_WSC-7-6        | 0.0000 | 0.0000 | 0.6715 | 0.0000 | 0.0805 | 0.0452 | 0.0526 | 0.1502 | OLDWP  |
| IND_WATKINS-007398 | 0.0000 | 0.0000 | 0.6705 | 0.1590 | 0.1322 | 0.0000 | 0.0000 | 0.0383 | OLDWP  |
| MLI_DAS5-001100    | 0.0122 | 0.0000 | 0.6595 | 0.2790 | 0.0492 | 0.0000 | 0.0000 | 0.0000 | OLDWP  |
| HON_DAS5-001079    | 0.0000 | 0.0068 | 0.6460 | 0.0000 | 0.0000 | 0.0000 | 0.0532 | 0.2940 | OLDWP  |
| IND_WSC-8-5        | 0.0095 | 0.0000 | 0.6441 | 0.2930 | 0.0533 | 0.0000 | 0.0000 | 0.0000 | OLDWP  |
| TUN_DAS5-004072    | 0.0000 | 0.0627 | 0.6423 | 0.0000 | 0.0000 | 0.0193 | 0.0000 | 0.2756 | OLDWP  |
| BRA_WATKINS-007705 | 0.0095 | 0.0646 | 0.6345 | 0.0022 | 0.1506 | 0.0144 | 0.0936 | 0.0306 | OLDWP  |
| EGY_PI-220431      | 0.0000 | 0.0026 | 0.6282 | 0.3407 | 0.0000 | 0.0000 | 0.0000 | 0.0285 | OLDWP  |
| IRN_DAS5-003641    | 0.0000 | 0.0000 | 0.6279 | 0.0000 | 0.1730 | 0.0000 | 0.0000 | 0.1990 | OLDWP  |
| USA_DAS5-004667    | 0.0284 | 0.0137 | 0.6147 | 0.2075 | 0.1357 | 0.0000 | 0.0000 | 0.0000 | OLDWP  |
| ETH_DAS5-003524    | 0.0000 | 0.0181 | 0.6028 | 0.0000 | 0.1095 | 0.0243 | 0.0442 | 0.2009 | OLDWP  |
| FSV_WATKINS-007137 | 0.0000 | 0.0000 | 0.5930 | 0.0000 | 0.3075 | 0.0000 | 0.0000 | 0.0995 | OLDWP  |
| FSV_WATKINS-007194 | 0.0000 | 0.0000 | 0.5761 | 0.0000 | 0.1826 | 0.0000 | 0.0000 | 0.2413 | OLDWP  |
| ARM_DAS5-003308    | 0.0000 | 0.0000 | 0.5733 | 0.0000 | 0.2635 | 0.0099 | 0.0000 | 0.1533 | OLDWP  |
| IND_WATKINS-007350 | 0.0026 | 0.0000 | 0.5579 | 0.1241 | 0.0000 | 0.0000 | 0.1257 | 0.1896 | OLDWP  |
| FSV_WATKINS-007548 | 0.0000 | 0.0000 | 0.5504 | 0.0000 | 0.2565 | 0.0092 | 0.0000 | 0.1839 | OLDWP  |
| KEN_DAS5-003754    | 0.0000 | 0.0197 | 0.5480 | 0.2528 | 0.1530 | 0.0000 | 0.0265 | 0.0000 | OLDWP  |
| AZE_DAS5-004465    | 0.0000 | 0.0000 | 0.5403 | 0.0000 | 0.2784 | 0.0077 | 0.0000 | 0.1735 | OLDWP  |
| AZE_WATKINS-007784 | 0.1003 | 0.0000 | 0.5393 | 0.0020 | 0.2550 | 0.0000 | 0.0170 | 0.0864 | OLDWP  |
| ZAF_DAS5-003999    | 0.0000 | 0.0390 | 0.5338 | 0.1697 | 0.0192 | 0.0956 | 0.0363 | 0.1063 | OLDWP  |
| GBR_DAS5-004158    | 0.0000 | 0.0000 | 0.5232 | 0.0992 | 0.2700 | 0.0000 | 0.1040 | 0.0036 | OLDWP  |
| USA_DAS5-001165    | 0.0609 | 0.0119 | 0.5217 | 0.2689 | 0.1356 | 0.0000 | 0.0000 | 0.0010 | OLDWP  |
| GEO_DAS5-003570    | 0.0049 | 0.0000 | 0.5191 | 0.0000 | 0.3233 | 0.0000 | 0.0000 | 0.1526 | OLDWP  |
| FSV_DAS5-003170    | 0.0000 | 0.0000 | 0.5094 | 0.0000 | 0.2706 | 0.0000 | 0.2199 | 0.0000 | OLDWP  |
| CAN_WATKINS-007472 | 0.0000 | 0.0000 | 0.5041 | 0.0000 | 0.2359 | 0.0000 | 0.0000 | 0.2599 | OLDWP  |
| IRN_DAS5-003661    | 0.0000 | 0.0000 | 0.5026 | 0.0000 | 0.2018 | 0.0000 | 0.0000 | 0.2955 | OLDWP  |
| ALG_WSC-5-12       | 0.0000 | 0.0623 | 0.4974 | 0.0000 | 0.0000 | 0.0212 | 0.0000 | 0.4190 | OLDWP  |
| AUS_DAS5-003327    | 0.0000 | 0.0372 | 0.4974 | 0.2358 | 0.1674 | 0.0038 | 0.0000 | 0.0583 | OLDWP  |
| FRA_WATKINS-007695 | 0.0000 | 0.0000 | 0.4942 | 0.0000 | 0.0726 | 0.0000 | 0.1668 | 0.2663 | OLDWP  |
| FSV_WATKINS-007191 | 0.0000 | 0.0000 | 0.4905 | 0.0000 | 0.3672 | 0.0000 | 0.0000 | 0.1423 | OLDWP  |
| ERI_DAS5-001368    | 0.0000 | 0.0152 | 0.4900 | 0.0000 | 0.2443 | 0.0098 | 0.0000 | 0.2407 | OLDWP  |

| Accessions         | Q1     | Q2     | Q3     | Q4     | Q5     | Q6     | Q7     | Q8     | Subpop |
|--------------------|--------|--------|--------|--------|--------|--------|--------|--------|--------|
| IND_WATKINS-007383 | 0.0148 | 0.0000 | 0.4779 | 0.0732 | 0.1572 | 0.0000 | 0.2769 | 0.0000 | OLDWP  |
| AUS_WATKINS-007036 | 0.0000 | 0.0372 | 0.4748 | 0.0000 | 0.1032 | 0.0424 | 0.0697 | 0.2727 | OLDWP  |
| CHN_WATKINS-007218 | 0.0000 | 0.0000 | 0.4435 | 0.1315 | 0.2472 | 0.0000 | 0.1663 | 0.0115 | OLDWP  |
| FSV_DAS5-002970    | 0.0000 | 0.3597 | 0.4406 | 0.0000 | 0.1765 | 0.0000 | 0.0232 | 0.0000 | OLDWP  |
| SAU_DAS5-003980    | 0.0212 | 0.0000 | 0.4293 | 0.0000 | 0.1754 | 0.0175 | 0.0000 | 0.3565 | OLDWP  |
| CHN_WATKINS-007250 | 0.0829 | 0.0000 | 0.4283 | 0.0541 | 0.0503 | 0.0000 | 0.3844 | 0.0000 | OLDWP  |
| MEX_WATKINS-007233 | 0.0000 | 0.0112 | 0.4211 | 0.1092 | 0.0628 | 0.0000 | 0.3536 | 0.0421 | OLDWP  |
| CHN_WATKINS-007256 | 0.0712 | 0.0000 | 0.4201 | 0.0470 | 0.0622 | 0.0000 | 0.3994 | 0.0000 | OLDWP  |
| FSV_DAS5-002492    | 0.0000 | 0.0000 | 0.4091 | 0.0136 | 0.2710 | 0.0017 | 0.0174 | 0.2872 | OLDWP  |
| CHN_WATKINS-007276 | 0.0033 | 0.0000 | 0.4089 | 0.0000 | 0.3197 | 0.0000 | 0.1921 | 0.0761 | OLDWP  |
| FSV_DAS5-002352    | 0.0000 | 0.0000 | 0.4059 | 0.0000 | 0.3273 | 0.0000 | 0.0000 | 0.2667 | OLDWP  |
| ROM_WATKINS-007515 | 0.0043 | 0.0000 | 0.3987 | 0.0000 | 0.3504 | 0.0000 | 0.2465 | 0.0000 | OLDWP  |
| SWE_DAS5-004415    | 0.0521 | 0.0902 | 0.3934 | 0.0000 | 0.1663 | 0.0482 | 0.0832 | 0.1666 | OLDWP  |
| EGY_DAS5-002920    | 0.0000 | 0.0347 | 0.3922 | 0.0690 | 0.3604 | 0.0000 | 0.0488 | 0.0949 | OLDWP  |
| AUS_DAS5-003227    | 0.0000 | 0.0000 | 0.3760 | 0.2960 | 0.3279 | 0.0000 | 0.0000 | 0.0000 | OLDWP  |
| SUD_DAS5-001470    | 0.1277 | 0.1166 | 0.3494 | 0.2835 | 0.0000 | 0.1227 | 0.0000 | 0.0000 | OLDWP  |
| GEO_DAS5-003577    | 0.0561 | 0.0948 | 0.3489 | 0.0000 | 0.0789 | 0.0570 | 0.0358 | 0.3285 | OLDWP  |
| TKM_DAS5-001564    | 0.0000 | 0.0000 | 0.3488 | 0.0000 | 0.3236 | 0.0000 | 0.0000 | 0.3276 | OLDWP  |
| UNK_WATKINS-007801 | 0.0004 | 0.0173 | 0.3454 | 0.0595 | 0.0076 | 0.0000 | 0.3257 | 0.2440 | OLDWP  |
| CHN_WATKINS-007209 | 0.0566 | 0.0000 | 0.3332 | 0.0000 | 0.0000 | 0.0000 | 0.2918 | 0.3183 | OLDWP  |
| FSV_DAS5-003243    | 0.0222 | 0.0000 | 0.3316 | 0.0000 | 0.1278 | 0.0028 | 0.3723 | 0.1433 | OLDWP  |
| BEL_DAS5-003360    | 0.0363 | 0.0996 | 0.3241 | 0.1172 | 0.1419 | 0.0000 | 0.1544 | 0.1265 | OLDWP  |
| AFG_WATKINS-007770 | 0.0171 | 0.0055 | 0.3077 | 0.0000 | 0.2972 | 0.0033 | 0.1962 | 0.1731 | OLDWP  |
| SPA_WATKINS-007661 | 0.0000 | 0.0000 | 0.3038 | 0.0000 | 0.1206 | 0.0000 | 0.2785 | 0.2970 | OLDWP  |
| POL_DAS5-002871    | 0.0131 | 0.0000 | 0.3021 | 0.0354 | 0.1773 | 0.0000 | 0.2036 | 0.2684 | OLDWP  |
| IND_WATKINS-007576 | 0.0174 | 0.0126 | 0.3011 | 0.0620 | 0.2427 | 0.0137 | 0.2140 | 0.1365 | OLDWP  |
| ROM_DAS5-002944    | 0.0000 | 0.0000 | 0.2994 | 0.0000 | 0.2931 | 0.0000 | 0.1778 | 0.2297 | OLDWP  |
| ZAF_DAS5-004000    | 0.0000 | 0.0616 | 0.2834 | 0.2713 | 0.0508 | 0.0775 | 0.1314 | 0.1239 | OLDWP  |
| USA_DAS5-001195    | 0.0002 | 0.0000 | 0.0000 | 0.9876 | 0.0000 | 0.0000 | 0.0121 | 0.0000 | WLDMix |
| AUS_DAS5-002909    | 0.0697 | 0.0000 | 0.0000 | 0.9303 | 0.0000 | 0.0000 | 0.0000 | 0.0000 | WLDMix |
| ALG_WSC-5-14       | 0.1374 | 0.0000 | 0.0000 | 0.8626 | 0.0000 | 0.0000 | 0.0000 | 0.0000 | WLDMix |
| USA_DAS5-003231    | 0.0754 | 0.0010 | 0.0000 | 0.8557 | 0.0000 | 0.0208 | 0.0000 | 0.0471 | WLDMix |
| USA_WSC-2-2        | 0.1559 | 0.0000 | 0.0000 | 0.8440 | 0.0000 | 0.0000 | 0.0000 | 0.0000 | WLDMix |
| AUS_DAS5-CORRELL   | 0.0000 | 0.0000 | 0.0000 | 0.8420 | 0.0000 | 0.0958 | 0.0000 | 0.0622 | WLDMix |
| USA_DAS5-003232    | 0.1596 | 0.0000 | 0.0000 | 0.8404 | 0.0000 | 0.0000 | 0.0000 | 0.0000 | WLDMix |
| MEX_WSC-1-3        | 0.1433 | 0.0000 | 0.0000 | 0.8336 | 0.0105 | 0.0000 | 0.0126 | 0.0000 | WLDMix |
| USA_DAS5-001463    | 0.0554 | 0.0546 | 0.0000 | 0.8223 | 0.0000 | 0.0000 | 0.0676 | 0.0000 | WLDMix |
| AUS_DAS5-KENNEDY   | 0.1884 | 0.0000 | 0.0000 | 0.8115 | 0.0000 | 0.0000 | 0.0000 | 0.0000 | WLDMix |
| USA_DAS5-003234    | 0.0734 | 0.0000 | 0.0000 | 0.7923 | 0.0000 | 0.0000 | 0.1342 | 0.0000 | WLDMix |
| ARG_DAS5-002017    | 0.0592 | 0.0000 | 0.0000 | 0.7676 | 0.1435 | 0.0000 | 0.0297 | 0.0000 | WLDMix |
| AUS_DAS5-AXE       | 0.0605 | 0.0000 | 0.0199 | 0.7650 | 0.0139 | 0.0000 | 0.1406 | 0.0000 | WLDMix |

| Accessions           | Q1     | Q2     | Q3     | Q4     | Q5     | Q6     | Q7     | Q8     | Subpop |
|----------------------|--------|--------|--------|--------|--------|--------|--------|--------|--------|
| MEX_WSC-6-9          | 0.0985 | 0.0000 | 0.0000 | 0.7569 | 0.1255 | 0.0000 | 0.0192 | 0.0000 | WLDMix |
| CAN_DAS5-002218      | 0.0209 | 0.1009 | 0.0000 | 0.7541 | 0.0000 | 0.0028 | 0.0952 | 0.0261 | WLDMix |
| ZIM_DAS5-002482      | 0.0556 | 0.0439 | 0.0999 | 0.7499 | 0.0184 | 0.0000 | 0.0000 | 0.0323 | WLDMix |
| AUS_DAS5-WYALKATCHEM | 0.2107 | 0.0000 | 0.0000 | 0.7492 | 0.0000 | 0.0000 | 0.0011 | 0.0389 | WLDMix |
| USA_WSC-4-1          | 0.1478 | 0.0000 | 0.0995 | 0.7458 | 0.0000 | 0.0000 | 0.0069 | 0.0000 | WLDMix |
| MEX_DAS5-003809      | 0.1708 | 0.0000 | 0.0000 | 0.7457 | 0.0834 | 0.0000 | 0.0000 | 0.0000 | WLDMix |
| MEX_WSC-2-6          | 0.2583 | 0.0000 | 0.0000 | 0.7416 | 0.0000 | 0.0000 | 0.0000 | 0.0000 | WLDMix |
| MEX_DAS5-003811      | 0.1569 | 0.0000 | 0.0000 | 0.7390 | 0.1040 | 0.0000 | 0.0000 | 0.0000 | WLDMix |
| SWI_WSC-4-4          | 0.0427 | 0.1105 | 0.0402 | 0.7385 | 0.0681 | 0.0000 | 0.0000 | 0.0000 | WLDMix |
| AUS_DAS5-HARTOG      | 0.2658 | 0.0000 | 0.0000 | 0.7341 | 0.0000 | 0.0000 | 0.0000 | 0.0000 | WLDMix |
| FSV_DAS5-002443      | 0.0000 | 0.0536 | 0.0076 | 0.7334 | 0.1977 | 0.0000 | 0.0000 | 0.0076 | WLDMix |
| USA_DAS5-LINCOLN     | 0.1819 | 0.0000 | 0.0547 | 0.7307 | 0.0000 | 0.0000 | 0.0000 | 0.0327 | WLDMix |
| MEX_DAS5-003817      | 0.2179 | 0.0000 | 0.0000 | 0.7305 | 0.0000 | 0.0000 | 0.0515 | 0.0000 | WLDMix |
| AUS_DAS5-BRAHAM      | 0.0643 | 0.0000 | 0.0000 | 0.7301 | 0.0934 | 0.0183 | 0.0699 | 0.0240 | WLDMix |
| AUS_DAS5-ESPADA      | 0.0567 | 0.0000 | 0.0445 | 0.7298 | 0.1549 | 0.0136 | 0.0005 | 0.0000 | WLDMix |
| MEX_DAS5-002705      | 0.1251 | 0.0000 | 0.0000 | 0.7297 | 0.0000 | 0.0000 | 0.0000 | 0.1451 | WLDMix |
| AUS_DAS5-FRAME       | 0.0312 | 0.0000 | 0.0000 | 0.7282 | 0.0581 | 0.0184 | 0.0312 | 0.1328 | WLDMix |
| AUS_DAS5-000110      | 0.0000 | 0.0142 | 0.1611 | 0.7194 | 0.1054 | 0.0000 | 0.0000 | 0.0000 | WLDMix |
| SYR_WSC-6-3          | 0.2167 | 0.0000 | 0.0000 | 0.7184 | 0.0000 | 0.0000 | 0.0649 | 0.0000 | WLDMix |
| ARG_DAS5-002590      | 0.0942 | 0.0000 | 0.0000 | 0.7165 | 0.0096 | 0.0000 | 0.1797 | 0.0000 | WLDMix |
| AUS_DAS5-002644      | 0.0866 | 0.0000 | 0.0000 | 0.7128 | 0.0181 | 0.0000 | 0.1825 | 0.0000 | WLDMix |
| MEX_DAS5-003815      | 0.1019 | 0.0000 | 0.0439 | 0.7127 | 0.0706 | 0.0000 | 0.0709 | 0.0000 | WLDMix |
| ECU_DAS5-001572      | 0.0000 | 0.0174 | 0.1729 | 0.7119 | 0.0977 | 0.0000 | 0.0000 | 0.0000 | WLDMix |
| ARG_DAS5-002577      | 0.0000 | 0.0000 | 0.0000 | 0.7103 | 0.0370 | 0.0000 | 0.2527 | 0.0000 | WLDMix |
| JAP_DAS5-001830      | 0.0000 | 0.0135 | 0.1641 | 0.7041 | 0.1184 | 0.0000 | 0.0000 | 0.0000 | WLDMix |
| AUS_DAS5-CARNAMAH    | 0.2092 | 0.0000 | 0.0386 | 0.7010 | 0.0420 | 0.0000 | 0.0091 | 0.0000 | WLDMix |
| AUS_DAS5-000350      | 0.0844 | 0.0000 | 0.0000 | 0.6999 | 0.0000 | 0.1835 | 0.0322 | 0.0000 | WLDMix |
| USA_WSC-3-7          | 0.0637 | 0.0000 | 0.0826 | 0.6957 | 0.0000 | 0.0000 | 0.1580 | 0.0000 | WLDMix |
| USA_Choteau          | 0.0437 | 0.0140 | 0.0000 | 0.6837 | 0.1041 | 0.0000 | 0.0591 | 0.0954 | WLDMix |
| USA_WSC-3-14         | 0.1357 | 0.0000 | 0.0165 | 0.6795 | 0.0000 | 0.0000 | 0.0795 | 0.0887 | WLDMix |
| USA_DAS5-001496      | 0.0507 | 0.0000 | 0.0174 | 0.6783 | 0.0000 | 0.0000 | 0.1171 | 0.1364 | WLDMix |
| AUS_WSC-1-1          | 0.0339 | 0.0000 | 0.0000 | 0.6770 | 0.1685 | 0.0428 | 0.0777 | 0.0000 | WLDMix |
| USA_DAS5-001767      | 0.0455 | 0.0525 | 0.0000 | 0.6765 | 0.1017 | 0.0068 | 0.0411 | 0.0759 | WLDMix |
| PAK_WSC-6-8          | 0.1059 | 0.0000 | 0.0506 | 0.6730 | 0.0000 | 0.0000 | 0.1705 | 0.0000 | WLDMix |
| ANG_DAS5-004675      | 0.1788 | 0.0000 | 0.0000 | 0.6693 | 0.0000 | 0.0000 | 0.1518 | 0.0000 | WLDMix |
| IND_WSC-6-1          | 0.0682 | 0.0000 | 0.1862 | 0.6689 | 0.0766 | 0.0000 | 0.0000 | 0.0000 | WLDMix |
| AUS_DAS5-003131      | 0.0000 | 0.0000 | 0.0161 | 0.6687 | 0.0742 | 0.0118 | 0.0351 | 0.1941 | WLDMix |
| MEX_DAS5-003794      | 0.0011 | 0.0694 | 0.0000 | 0.6655 | 0.0000 | 0.0846 | 0.0408 | 0.1387 | WLDMix |
| USA_WSC-3-12         | 0.1450 | 0.0000 | 0.0032 | 0.6641 | 0.0000 | 0.0000 | 0.1877 | 0.0000 | WLDMix |
| POR_DAS5-001382      | 0.0000 | 0.0465 | 0.0000 | 0.6610 | 0.0000 | 0.0564 | 0.0000 | 0.2360 | WLDMix |
| USA_WSC-3-13         | 0.0418 | 0.0000 | 0.0181 | 0.6602 | 0.0000 | 0.0000 | 0.2799 | 0.0000 | WLDMix |

| Accessions       | Q1     | Q2     | Q3     | Q4     | Q5     | Q6     | Q7     | Q8     | Subpop |
|------------------|--------|--------|--------|--------|--------|--------|--------|--------|--------|
| IND_WSC-1-9      | 0.1088 | 0.0000 | 0.0606 | 0.6584 | 0.0000 | 0.0000 | 0.1721 | 0.0000 | WLDMix |
| SAU_DAS5-003977  | 0.2503 | 0.0000 | 0.0000 | 0.6581 | 0.0019 | 0.0000 | 0.0896 | 0.0000 | WLDMix |
| ISR_DAS5-003698  | 0.1086 | 0.0908 | 0.0570 | 0.6520 | 0.0000 | 0.0875 | 0.0042 | 0.0000 | WLDMix |
| ZAF_DAS5-003120  | 0.1588 | 0.0371 | 0.0613 | 0.6359 | 0.0670 | 0.0000 | 0.0374 | 0.0025 | WLDMix |
| ARG_WSC-2-5      | 0.1200 | 0.0000 | 0.0000 | 0.6338 | 0.2461 | 0.0000 | 0.0000 | 0.0000 | WLDMix |
| ZIM_DAS5-004536  | 0.1168 | 0.0000 | 0.0782 | 0.6203 | 0.0860 | 0.0000 | 0.0631 | 0.0356 | WLDMix |
| BOL_DAS5-002237  | 0.0907 | 0.0000 | 0.0658 | 0.6166 | 0.0000 | 0.0000 | 0.2268 | 0.0000 | WLDMix |
| ISR_DAS5-001225  | 0.0733 | 0.0122 | 0.0556 | 0.6162 | 0.1567 | 0.0000 | 0.0860 | 0.0000 | WLDMix |
| CHL_DAS5-003442  | 0.1338 | 0.0119 | 0.0476 | 0.6138 | 0.0000 | 0.0000 | 0.1928 | 0.0000 | WLDMix |
| AUS_DAS5-ELLISON | 0.1674 | 0.0108 | 0.1535 | 0.6124 | 0.0559 | 0.0000 | 0.0000 | 0.0000 | WLDMix |
| MEX_WSC-2-4      | 0.0524 | 0.0105 | 0.0000 | 0.5994 | 0.2037 | 0.1290 | 0.0049 | 0.0000 | WLDMix |
| COL_DAS5-003123  | 0.1367 | 0.0000 | 0.0000 | 0.5953 | 0.0000 | 0.0000 | 0.2679 | 0.0000 | WLDMix |
| COL_DAS5-003468  | 0.1818 | 0.0000 | 0.0024 | 0.5930 | 0.0732 | 0.0000 | 0.1496 | 0.0000 | WLDMix |
| ARG_DAS5-002555  | 0.1278 | 0.0000 | 0.0000 | 0.5912 | 0.0000 | 0.0000 | 0.1328 | 0.1481 | WLDMix |
| AUS_DAS5-SHAW-VB | 0.0629 | 0.0742 | 0.0000 | 0.5868 | 0.2485 | 0.0000 | 0.0276 | 0.0000 | WLDMix |
| ARG_DAS5-002173  | 0.0542 | 0.0090 | 0.0000 | 0.5839 | 0.1429 | 0.0000 | 0.2099 | 0.0000 | WLDMix |
| ERI_DAS5-001365  | 0.0424 | 0.0124 | 0.0800 | 0.5819 | 0.2832 | 0.0000 | 0.0000 | 0.0000 | WLDMix |
| ZAF_DAS5-004005  | 0.0983 | 0.0913 | 0.0418 | 0.5819 | 0.1410 | 0.0213 | 0.0000 | 0.0245 | WLDMix |
| MEX_DAS5-001740  | 0.0063 | 0.0000 | 0.0762 | 0.5792 | 0.2460 | 0.0000 | 0.0159 | 0.0763 | WLDMix |
| BOL_DAS5-003387  | 0.1028 | 0.0000 | 0.0886 | 0.5772 | 0.0000 | 0.0000 | 0.2313 | 0.0000 | WLDMix |
| PER_DAS5-003907  | 0.0000 | 0.0000 | 0.0054 | 0.5747 | 0.0438 | 0.0000 | 0.2944 | 0.0817 | WLDMix |
| COL_DAS5-003469  | 0.1647 | 0.0000 | 0.0233 | 0.5707 | 0.1230 | 0.0000 | 0.1184 | 0.0000 | WLDMix |
| AUS_DAS5-000439  | 0.0000 | 0.0000 | 0.0042 | 0.5696 | 0.0000 | 0.4029 | 0.0000 | 0.0233 | WLDMix |
| MOR_DAS5-003838  | 0.0970 | 0.0000 | 0.0657 | 0.5596 | 0.2777 | 0.0000 | 0.0000 | 0.0000 | WLDMix |
| AUS_DAS5-000305  | 0.0000 | 0.0000 | 0.0000 | 0.5590 | 0.0000 | 0.4390 | 0.0020 | 0.0000 | WLDMix |
| AUS_DAS5-QALBIS  | 0.1004 | 0.0000 | 0.0000 | 0.5563 | 0.0944 | 0.0000 | 0.1019 | 0.1469 | WLDMix |
| KEN_DAS5-003744  | 0.0000 | 0.0233 | 0.0000 | 0.5546 | 0.1115 | 0.0000 | 0.0374 | 0.2732 | WLDMix |
| AUS_DAS5-003319  | 0.0000 | 0.0000 | 0.0573 | 0.5520 | 0.2947 | 0.0000 | 0.0000 | 0.0960 | WLDMix |
| COL_DAS5-001955  | 0.0590 | 0.0000 | 0.0000 | 0.5465 | 0.2460 | 0.0000 | 0.1484 | 0.0000 | WLDMix |
| EGY_DAS5-002411  | 0.0175 | 0.0187 | 0.4120 | 0.5446 | 0.0020 | 0.0012 | 0.0000 | 0.0040 | WLDMix |
| EGY_DAS5-001829  | 0.0000 | 0.0076 | 0.3792 | 0.5439 | 0.0582 | 0.0111 | 0.0000 | 0.0000 | WLDMix |
| ISR_DAS5-001016  | 0.0138 | 0.1100 | 0.1787 | 0.5400 | 0.0620 | 0.0795 | 0.0160 | 0.0000 | WLDMix |
| EGY_DAS5-001149  | 0.0000 | 0.0040 | 0.4032 | 0.5385 | 0.0398 | 0.0145 | 0.0000 | 0.0000 | WLDMix |
| AUS_DAS5-003320  | 0.0000 | 0.0000 | 0.0688 | 0.5382 | 0.3139 | 0.0000 | 0.0000 | 0.0790 | WLDMix |
| ARG_DAS5-002166  | 0.1221 | 0.0133 | 0.0000 | 0.5365 | 0.1452 | 0.0000 | 0.1552 | 0.0276 | WLDMix |
| ARG_DAS5-002178  | 0.1213 | 0.0054 | 0.0000 | 0.5341 | 0.1634 | 0.0000 | 0.0000 | 0.1757 | WLDMix |
| ZAM_DAS5-001488  | 0.0893 | 0.0000 | 0.0870 | 0.5328 | 0.1022 | 0.0000 | 0.0000 | 0.1887 | WLDMix |
| AUS_DAS5-000265  | 0.0000 | 0.0000 | 0.0259 | 0.5294 | 0.0000 | 0.2878 | 0.1548 | 0.0021 | WLDMix |
| ISR_DAS5-003707  | 0.0728 | 0.0000 | 0.2812 | 0.5264 | 0.1099 | 0.0000 | 0.0098 | 0.0000 | WLDMix |
| ARG_DAS5-002566  | 0.1332 | 0.0000 | 0.0000 | 0.5220 | 0.0577 | 0.0000 | 0.1652 | 0.1219 | WLDMix |
| FSV_DAS5-003024  | 0.2144 | 0.0116 | 0.0031 | 0.5217 | 0.1211 | 0.0027 | 0.0720 | 0.0534 | WLDMix |

| Accessions         | Q1     | Q2     | Q3     | Q4     | Q5     | Q6     | Q7     | Q8     | Subpop |
|--------------------|--------|--------|--------|--------|--------|--------|--------|--------|--------|
| MEX_DAS5-002004    | 0.1046 | 0.0433 | 0.1866 | 0.5216 | 0.0000 | 0.0832 | 0.0000 | 0.0608 | WLDMix |
| AUS_DAS5-000297    | 0.0943 | 0.0007 | 0.0000 | 0.5204 | 0.1086 | 0.1400 | 0.1288 | 0.0071 | WLDMix |
| AUS_DAS5-H45       | 0.4094 | 0.0000 | 0.0000 | 0.5190 | 0.0257 | 0.0000 | 0.0458 | 0.0000 | WLDMix |
| AUS_DAS5-000317    | 0.0910 | 0.0000 | 0.0113 | 0.5133 | 0.0456 | 0.2827 | 0.0561 | 0.0000 | WLDMix |
| PER_DAS5-003905    | 0.0000 | 0.0000 | 0.2752 | 0.5126 | 0.1434 | 0.0000 | 0.0687 | 0.0000 | WLDMix |
| MEX_DAS5-BOBWHITE  | 0.0667 | 0.0000 | 0.0000 | 0.5085 | 0.2579 | 0.0000 | 0.1670 | 0.0000 | WLDMix |
| YEM_DAS5-004257    | 0.0927 | 0.0000 | 0.0704 | 0.5034 | 0.3086 | 0.0000 | 0.0249 | 0.0000 | WLDMix |
| TUN_DAS5-004078    | 0.0196 | 0.0000 | 0.0773 | 0.5028 | 0.4003 | 0.0000 | 0.0000 | 0.0000 | WLDMix |
| BUR_DAS5-001002    | 0.0000 | 0.1047 | 0.0914 | 0.4997 | 0.0000 | 0.0540 | 0.0671 | 0.1831 | WLDMix |
| AUS_DAS5-000336    | 0.1345 | 0.0000 | 0.0000 | 0.4997 | 0.0034 | 0.3215 | 0.0409 | 0.0000 | WLDMix |
| CHN_DAS5-001309    | 0.0880 | 0.0000 | 0.0819 | 0.4987 | 0.0000 | 0.0000 | 0.3219 | 0.0095 | WLDMix |
| AUS_DAS5-000291    | 0.0000 | 0.0058 | 0.0000 | 0.4979 | 0.1077 | 0.2363 | 0.1190 | 0.0333 | WLDMix |
| ARG_DAS5-002014    | 0.0244 | 0.0058 | 0.0000 | 0.4953 | 0.1005 | 0.0000 | 0.1083 | 0.2657 | WLDMix |
| JAP_WSC-4-8        | 0.0473 | 0.1286 | 0.0058 | 0.4943 | 0.1303 | 0.0000 | 0.0026 | 0.1911 | WLDMix |
| AUS_DAS5-000250    | 0.0454 | 0.0157 | 0.0000 | 0.4935 | 0.0105 | 0.4274 | 0.0048 | 0.0027 | WLDMix |
| AUS_DAS5-000032    | 0.0000 | 0.0000 | 0.0000 | 0.4907 | 0.0000 | 0.3544 | 0.0191 | 0.1357 | WLDMix |
| BUR_DAS5-003428    | 0.0000 | 0.0610 | 0.1589 | 0.4885 | 0.1288 | 0.0320 | 0.0479 | 0.0829 | WLDMix |
| MEX_DAS5-001752    | 0.0891 | 0.0000 | 0.1021 | 0.4848 | 0.2193 | 0.0000 | 0.0151 | 0.0896 | WLDMix |
| JAP_DAS5-002487    | 0.0437 | 0.1364 | 0.0000 | 0.4846 | 0.1447 | 0.0000 | 0.0000 | 0.1906 | WLDMix |
| COL_DAS5-003471    | 0.0431 | 0.0165 | 0.0230 | 0.4841 | 0.2460 | 0.0000 | 0.1519 | 0.0354 | WLDMix |
| MEX_DAS5-002368    | 0.1004 | 0.0061 | 0.0408 | 0.4809 | 0.0730 | 0.0000 | 0.2988 | 0.0000 | WLDMix |
| USA_Vida           | 0.1191 | 0.0259 | 0.0190 | 0.4792 | 0.0588 | 0.0000 | 0.1149 | 0.1830 | WLDMix |
| KEN_DAS5-001548    | 0.0221 | 0.0139 | 0.0513 | 0.4783 | 0.1961 | 0.0000 | 0.1927 | 0.0455 | WLDMix |
| AUS_DAS5-000318    | 0.1284 | 0.0016 | 0.0000 | 0.4773 | 0.0000 | 0.2656 | 0.1271 | 0.0000 | WLDMix |
| AUS_DAS5-000263    | 0.0000 | 0.0026 | 0.0182 | 0.4750 | 0.0914 | 0.3516 | 0.0612 | 0.0000 | WLDMix |
| KEN_DAS5-003753    | 0.0000 | 0.1254 | 0.0485 | 0.4738 | 0.1309 | 0.1145 | 0.0655 | 0.0413 | WLDMix |
| SAU_Cltr-15144     | 0.0000 | 0.0071 | 0.3802 | 0.4703 | 0.1190 | 0.0233 | 0.0000 | 0.0000 | WLDMix |
| AUS_DAS5-EGA-WYLIE | 0.3917 | 0.0029 | 0.0000 | 0.4686 | 0.0557 | 0.0000 | 0.0810 | 0.0000 | WLDMix |
| PER_WSC-5-7        | 0.0820 | 0.0169 | 0.0156 | 0.4667 | 0.1597 | 0.0000 | 0.2105 | 0.0485 | WLDMix |
| LIB_PI-54431       | 0.0000 | 0.0000 | 0.1572 | 0.4666 | 0.3022 | 0.0000 | 0.0000 | 0.0740 | WLDMix |
| ARG_DAS5-002180    | 0.0687 | 0.0207 | 0.0000 | 0.4651 | 0.1284 | 0.0005 | 0.1212 | 0.1954 | WLDMix |
| ARG_DAS5-002255    | 0.1194 | 0.0323 | 0.0000 | 0.4591 | 0.1217 | 0.0000 | 0.1242 | 0.1432 | WLDMix |
| AUS_DAS5-003337    | 0.0000 | 0.0000 | 0.0397 | 0.4584 | 0.2623 | 0.0000 | 0.0369 | 0.2028 | WLDMix |
| EGY_DAS5-003502    | 0.0000 | 0.0000 | 0.4000 | 0.4574 | 0.1112 | 0.0313 | 0.0000 | 0.0000 | WLDMix |
| AUS_DAS5-000298    | 0.0064 | 0.0000 | 0.0000 | 0.4567 | 0.0497 | 0.3589 | 0.1282 | 0.0000 | WLDMix |
| Bakhatwa           | 0.3668 | 0.0000 | 0.0000 | 0.4555 | 0.1303 | 0.0000 | 0.0474 | 0.0000 | WLDMix |
| USA_DAS5-ALPOWA    | 0.0587 | 0.0000 | 0.0133 | 0.4504 | 0.2913 | 0.0000 | 0.0413 | 0.1448 | WLDMix |
| ZAM_DAS5-001490    | 0.0000 | 0.0000 | 0.1446 | 0.4429 | 0.1010 | 0.0000 | 0.0715 | 0.2399 | WLDMix |
| MEX_DAS5-003805    | 0.0710 | 0.0000 | 0.0412 | 0.4394 | 0.0000 | 0.2889 | 0.1595 | 0.0000 | WLDMix |
| CHL_DAS5-003447    | 0.1633 | 0.0000 | 0.0430 | 0.4388 | 0.1462 | 0.0000 | 0.1115 | 0.0973 | WLDMix |
| ECU_DAS5-003499    | 0.3704 | 0.0000 | 0.0000 | 0.4364 | 0.1932 | 0.0000 | 0.0000 | 0.0000 | WLDMix |

| Accessions         | Q1     | Q2     | Q3     | Q4     | Q5     | Q6     | Q7     | Q8     | Subpop |
|--------------------|--------|--------|--------|--------|--------|--------|--------|--------|--------|
| ECU_DAS5-001191    | 0.1457 | 0.0035 | 0.0644 | 0.4329 | 0.2123 | 0.0000 | 0.1411 | 0.0000 | WLDMix |
| AUS_DAS5-000339    | 0.1671 | 0.0000 | 0.0000 | 0.4312 | 0.0000 | 0.3556 | 0.0461 | 0.0000 | WLDMix |
| YEM_DAS5-004245    | 0.1249 | 0.0000 | 0.1990 | 0.4309 | 0.0000 | 0.0000 | 0.1499 | 0.0953 | WLDMix |
| PER_DAS5-003909    | 0.0000 | 0.0000 | 0.2757 | 0.4207 | 0.1366 | 0.0000 | 0.0422 | 0.1249 | WLDMix |
| CZE_DAS5-001559    | 0.1728 | 0.0000 | 0.0000 | 0.4185 | 0.1011 | 0.0000 | 0.2027 | 0.1050 | WLDMix |
| BRA_DAS5-003405    | 0.1455 | 0.0332 | 0.0997 | 0.4177 | 0.0430 | 0.0000 | 0.1238 | 0.1371 | WLDMix |
| FSV_WATKINS-007192 | 0.0000 | 0.0000 | 0.0904 | 0.4067 | 0.1961 | 0.0000 | 0.0000 | 0.3067 | WLDMix |
| ZAF_DAS5-004001    | 0.0816 | 0.0245 | 0.1091 | 0.4066 | 0.0000 | 0.0000 | 0.3547 | 0.0235 | WLDMix |
| VEN_DAS5-001433    | 0.0922 | 0.0341 | 0.1528 | 0.4064 | 0.0752 | 0.0000 | 0.0000 | 0.2394 | WLDMix |
| PER_DAS5-003908    | 0.0052 | 0.0000 | 0.2566 | 0.4054 | 0.0000 | 0.0000 | 0.2454 | 0.0874 | WLDMix |
| CAN_DAS5-003430    | 0.0000 | 0.0578 | 0.0162 | 0.4044 | 0.4200 | 0.0000 | 0.1016 | 0.0000 | WLDMix |
| ARG_DAS5-002192    | 0.0845 | 0.0000 | 0.0000 | 0.4029 | 0.3352 | 0.0000 | 0.1615 | 0.0159 | WLDMix |
| ARG_DAS5-003299    | 0.0397 | 0.0043 | 0.1574 | 0.3974 | 0.2286 | 0.0257 | 0.1095 | 0.0374 | WLDMix |
| AUS_DAS5-000295    | 0.0820 | 0.0000 | 0.0065 | 0.3872 | 0.0621 | 0.2716 | 0.1906 | 0.0000 | WLDMix |
| ARG_DAS5-002549    | 0.0000 | 0.0113 | 0.0753 | 0.3853 | 0.3528 | 0.0000 | 0.0552 | 0.1201 | WLDMix |
| USA_DAS5-002652    | 0.0027 | 0.0057 | 0.2078 | 0.3835 | 0.3760 | 0.0046 | 0.0195 | 0.0000 | WLDMix |
| AUS_DAS5-000311    | 0.1721 | 0.0000 | 0.0130 | 0.3788 | 0.0048 | 0.3238 | 0.1076 | 0.0000 | WLDMix |
| USA_DAS5-002775    | 0.0175 | 0.0448 | 0.0000 | 0.3770 | 0.1244 | 0.0000 | 0.1433 | 0.2930 | WLDMix |
| AUS_DAS5-003338    | 0.0000 | 0.0971 | 0.0598 | 0.3770 | 0.2121 | 0.0000 | 0.0621 | 0.1919 | WLDMix |
| ARG_DAS5-002584    | 0.1698 | 0.0615 | 0.0000 | 0.3641 | 0.0425 | 0.0980 | 0.2421 | 0.0219 | WLDMix |
| ARM_DAS5-003301    | 0.0485 | 0.0000 | 0.2329 | 0.3544 | 0.2230 | 0.0172 | 0.1092 | 0.0147 | WLDMix |
| BRA_DAS5-003402    | 0.0904 | 0.0000 | 0.0700 | 0.3456 | 0.0512 | 0.0000 | 0.2838 | 0.1589 | WLDMix |
| FSV_DAS5-002467    | 0.0000 | 0.1504 | 0.1772 | 0.3436 | 0.2878 | 0.0231 | 0.0177 | 0.0000 | WLDMix |
| ARG_DAS5-002174    | 0.0148 | 0.0216 | 0.0000 | 0.3395 | 0.2685 | 0.0000 | 0.1301 | 0.2254 | WLDMix |
| PER_DAS5-003911    | 0.0000 | 0.0000 | 0.2829 | 0.3350 | 0.2218 | 0.0000 | 0.0769 | 0.0834 | WLDMix |
| ZIM_DAS5-001471    | 0.0000 | 0.1231 | 0.0000 | 0.3233 | 0.0962 | 0.0829 | 0.0970 | 0.2774 | WLDMix |
| ECU_DAS5-003497    | 0.2115 | 0.0000 | 0.1685 | 0.3223 | 0.0000 | 0.0000 | 0.2976 | 0.0000 | WLDMix |
| ANG_DAS5-001265    | 0.0000 | 0.0622 | 0.1339 | 0.3206 | 0.1900 | 0.0827 | 0.0000 | 0.2106 | WLDMix |
| AUS_DAS5-003316    | 0.0000 | 0.0311 | 0.1171 | 0.3029 | 0.1816 | 0.0005 | 0.0673 | 0.2993 | WLDMix |
| ARG_DAS5-004653    | 0.0069 | 0.0031 | 0.1336 | 0.2947 | 0.1625 | 0.0243 | 0.1464 | 0.2284 | WLDMix |
| ETH_DAS5-001163    | 0.0666 | 0.0000 | 0.2501 | 0.2941 | 0.2538 | 0.0084 | 0.0463 | 0.0807 | WLDMix |
| NEW_DAS5-001196    | 0.0388 | 0.0936 | 0.0849 | 0.2870 | 0.1889 | 0.0089 | 0.2095 | 0.0884 | WLDMix |
| LEB_DAS5-001551    | 0.0250 | 0.0065 | 0.1946 | 0.2845 | 0.1479 | 0.0016 | 0.1675 | 0.1723 | WLDMix |
| ZAF_DAS5-001866    | 0.0297 | 0.1199 | 0.1194 | 0.2322 | 0.1956 | 0.1834 | 0.0783 | 0.0416 | WLDMix |
| POL_DAS5-002295    | 0.0503 | 0.2987 | 0.0985 | 0.1914 | 0.1773 | 0.0000 | 0.1837 | 0.0000 | WLDMix |

Accession: the first three letters indicate the United Nations country naming code from where the accession originated followed by accession name.

**Table S2.** The list of accessions (n=347) in the landrace subset of the exome data set and ancestral coefficient of each accession based on ancestral population defined at  $K=7$ .

| Accession          | Q1     | Q2     | Q3     | Q4     | Q5     | Q6     | Q7     | Subpop |
|--------------------|--------|--------|--------|--------|--------|--------|--------|--------|
| ROM_DAS5-002943    | 0.0000 | 0.0000 | 0.0000 | 0.0000 | 0.0000 | 0.9999 | 0.0000 | EEU    |
| FSV_DAS5-003162    | 0.0000 | 0.0000 | 0.0000 | 0.0000 | 0.0000 | 0.9999 | 0.0000 | EEU    |
| FSV_DAS5-003175    | 0.0000 | 0.0000 | 0.0000 | 0.0000 | 0.0000 | 0.9999 | 0.0000 | EEU    |
| TUR_WATKINS-007033 | 0.0000 | 0.0000 | 0.0000 | 0.0000 | 0.0000 | 0.9999 | 0.0000 | EEU    |
| UNK_WATKINS-007096 | 0.0000 | 0.0000 | 0.0000 | 0.0000 | 0.0000 | 0.9999 | 0.0000 | EEU    |
| UNK_WATKINS-007099 | 0.0000 | 0.0000 | 0.0000 | 0.0000 | 0.0000 | 0.9999 | 0.0000 | EEU    |
| AZE_WATKINS-007170 | 0.0000 | 0.0000 | 0.0000 | 0.0000 | 0.0000 | 0.9999 | 0.0000 | EEU    |
| BRA_WATKINS-007179 | 0.0000 | 0.0000 | 0.0000 | 0.0000 | 0.0000 | 0.9999 | 0.0000 | EEU    |
| IRN_WATKINS-007697 | 0.0000 | 0.0000 | 0.0000 | 0.0000 | 0.0000 | 0.9999 | 0.0000 | EEU    |
| FSV_DAS5-003174    | 0.0000 | 0.0000 | 0.0000 | 0.0000 | 0.0000 | 0.9999 | 0.0000 | EEU    |
| BUL_WATKINS-007565 | 0.0097 | 0.0000 | 0.0000 | 0.0000 | 0.0000 | 0.9902 | 0.0000 | EEU    |
| POL_DAS5-002877    | 0.0000 | 0.0000 | 0.0000 | 0.0122 | 0.0000 | 0.9878 | 0.0000 | EEU    |
| ROM_DAS5-002946    | 0.0153 | 0.0000 | 0.0000 | 0.0000 | 0.0000 | 0.9653 | 0.0193 | EEU    |
| POL_DAS5-002878    | 0.0013 | 0.0000 | 0.0000 | 0.0564 | 0.0000 | 0.9422 | 0.0000 | EEU    |
| YUG_WATKINS-007292 | 0.0464 | 0.0000 | 0.0000 | 0.0126 | 0.0000 | 0.9410 | 0.0000 | EEU    |
| FSV_DAS5-003163    | 0.0497 | 0.0000 | 0.0000 | 0.0000 | 0.0000 | 0.9376 | 0.0127 | EEU    |
| BUL_WATKINS-007763 | 0.0000 | 0.0000 | 0.0853 | 0.0000 | 0.0000 | 0.9146 | 0.0000 | EEU    |
| BUL_WATKINS-007563 | 0.0220 | 0.0000 | 0.0000 | 0.0656 | 0.0000 | 0.9123 | 0.0000 | EEU    |
| POL_DAS5-002862    | 0.0157 | 0.0000 | 0.0000 | 0.0931 | 0.0000 | 0.8912 | 0.0000 | EEU    |
| EGY_WATKINS-007325 | 0.0000 | 0.0000 | 0.0329 | 0.0820 | 0.0000 | 0.8851 | 0.0000 | EEU    |
| YUG_WATKINS-007290 | 0.0000 | 0.0000 | 0.0000 | 0.1237 | 0.0000 | 0.8763 | 0.0000 | EEU    |
| EUR_DAS5-004508    | 0.0503 | 0.0151 | 0.0069 | 0.1074 | 0.0000 | 0.8202 | 0.0000 | EEU    |
| FSV_WATKINS-007536 | 0.0367 | 0.0000 | 0.0295 | 0.0460 | 0.0657 | 0.8093 | 0.0129 | EEU    |
| MON_DAS5-004267    | 0.0089 | 0.0936 | 0.0281 | 0.0000 | 0.0060 | 0.8010 | 0.0624 | EEU    |
| ROM_DAS5-002945    | 0.0298 | 0.0102 | 0.0367 | 0.0649 | 0.0191 | 0.7986 | 0.0406 | EEU    |
| GRE_WATKINS-007738 | 0.0000 | 0.1132 | 0.0430 | 0.0678 | 0.0000 | 0.7536 | 0.0224 | EEU    |
| YUG_WATKINS-007174 | 0.0000 | 0.1959 | 0.0000 | 0.0544 | 0.0000 | 0.7497 | 0.0000 | EEU    |
| POL_DAS5-002876    | 0.0356 | 0.0000 | 0.0000 | 0.2174 | 0.0000 | 0.7470 | 0.0000 | EEU    |
| POL_DAS5-002863    | 0.0000 | 0.0000 | 0.0000 | 0.2573 | 0.0000 | 0.7427 | 0.0000 | EEU    |
| AUT_DAS5-003343    | 0.0543 | 0.1130 | 0.1105 | 0.0000 | 0.0000 | 0.7222 | 0.0000 | EEU    |
| FSV_DAS5-002494    | 0.0623 | 0.0818 | 0.1390 | 0.0000 | 0.0334 | 0.6834 | 0.0000 | EEU    |
| YUG_WATKINS-007061 | 0.0000 | 0.2080 | 0.0101 | 0.1022 | 0.0000 | 0.6797 | 0.0000 | EEU    |
| BUL_DAS5-003205    | 0.0871 | 0.1762 | 0.0512 | 0.0120 | 0.0000 | 0.6736 | 0.0000 | EEU    |
| GRE_WATKINS-007523 | 0.0000 | 0.2661 | 0.0000 | 0.0000 | 0.0000 | 0.6718 | 0.0621 | EEU    |
| GRE_WATKINS-007524 | 0.0000 | 0.1385 | 0.0435 | 0.1192 | 0.0043 | 0.6659 | 0.0286 | EEU    |
| BUL_WATKINS-007769 | 0.0000 | 0.0000 | 0.0000 | 0.3505 | 0.0000 | 0.6495 | 0.0000 | EEU    |
| AUT_DAS5-003342    | 0.0497 | 0.1216 | 0.1745 | 0.0000 | 0.0150 | 0.6392 | 0.0000 | EEU    |
| DEN_DAS5-003490    | 0.0465 | 0.0682 | 0.0635 | 0.1313 | 0.0569 | 0.6336 | 0.0000 | EEU    |
| FSV_DAS5-003244    | 0.0000 | 0.0348 | 0.3619 | 0.0000 | 0.0000 | 0.6033 | 0.0000 | EEU    |



| Accession          | Q1     | Q2     | Q3     | Q4     | Q5     | Q6     | Q7     | Subpop |
|--------------------|--------|--------|--------|--------|--------|--------|--------|--------|
| BEL_DAS5-004342    | 0.0000 | 0.0000 | 0.0000 | 0.3858 | 0.0165 | 0.5793 | 0.0184 | EEU    |
| POL_DAS5-002864    | 0.0000 | 0.0000 | 0.0000 | 0.4252 | 0.0000 | 0.5747 | 0.0000 | EEU    |
| MOR_WATKINS-007435 | 0.0213 | 0.1674 | 0.0000 | 0.0390 | 0.1976 | 0.5537 | 0.0210 | EEU    |
| CHN_WATKINS-007244 | 0.0746 | 0.0000 | 0.0000 | 0.3858 | 0.0000 | 0.5396 | 0.0000 | EEU    |
| YUG_WATKINS-007803 | 0.2218 | 0.0000 | 0.0000 | 0.1566 | 0.0079 | 0.5190 | 0.0947 | EEU    |
| JAP_DAS5-003729    | 0.0324 | 0.0000 | 0.0000 | 0.4681 | 0.0000 | 0.4995 | 0.0000 | EEU    |
| FSV_DAS5-003172    | 0.1155 | 0.1532 | 0.2481 | 0.0000 | 0.0000 | 0.4832 | 0.0000 | EEU    |
| DEN_DAS5-003494    | 0.0475 | 0.0068 | 0.0047 | 0.4474 | 0.0106 | 0.4829 | 0.0000 | EEU    |
| AFG_WATKINS-007108 | 0.0000 | 0.0000 | 0.3484 | 0.1066 | 0.0000 | 0.4805 | 0.0645 | EEU    |
| SPA_WATKINS-007190 | 0.0523 | 0.3599 | 0.0000 | 0.1061 | 0.0104 | 0.4713 | 0.0000 | EEU    |
| ROM_WATKINS-007515 | 0.0140 | 0.0000 | 0.1364 | 0.2139 | 0.0000 | 0.4062 | 0.2295 | EEU    |
| CHN_WATKINS-007276 | 0.0000 | 0.0284 | 0.1885 | 0.1652 | 0.0000 | 0.3940 | 0.2238 | EEU    |
| CHN_WATKINS-007218 | 0.0312 | 0.0000 | 0.1232 | 0.1749 | 0.0000 | 0.3645 | 0.3062 | EEU    |
| AFG_WATKINS-007770 | 0.0047 | 0.0549 | 0.2927 | 0.2351 | 0.0069 | 0.3369 | 0.0688 | EEU    |
| IRN_WATKINS-007715 | 0.0118 | 0.1638 | 0.1711 | 0.2057 | 0.0372 | 0.3365 | 0.0740 | EEU    |
| CHN_WATKINS-007246 | 0.0000 | 0.2643 | 0.0391 | 0.2360 | 0.0242 | 0.3359 | 0.1004 | EEU    |
| CRO_DAS5-003478    | 0.0000 | 0.2809 | 0.0839 | 0.3039 | 0.0198 | 0.3115 | 0.0000 | EEU    |
| MAC_DAS5-003783    | 0.1745 | 0.2893 | 0.2357 | 0.0000 | 0.0000 | 0.3005 | 0.0000 | EEU    |
| NLD_DAS5-001291    | 0.0490 | 0.2551 | 0.0000 | 0.1525 | 0.1960 | 0.2990 | 0.0483 | EEU    |
| ITA_DAS5-004421    | 0.0000 | 0.0000 | 0.0000 | 0.9999 | 0.0000 | 0.0000 | 0.0000 | EUMED  |
| SPA_WATKINS-007445 | 0.0000 | 0.0000 | 0.0000 | 0.9999 | 0.0000 | 0.0000 | 0.0000 | EUMED  |
| MOR_WATKINS-007651 | 0.0000 | 0.0000 | 0.0000 | 0.9999 | 0.0000 | 0.0000 | 0.0000 | EUMED  |
| TUR_WATKINS-007756 | 0.0000 | 0.0000 | 0.0000 | 0.9999 | 0.0000 | 0.0000 | 0.0000 | EUMED  |
| SPA_WATKINS-007643 | 0.0000 | 0.0439 | 0.0000 | 0.9319 | 0.0000 | 0.0241 | 0.0000 | EUMED  |
| POR_DAS5-001415    | 0.0000 | 0.0996 | 0.0000 | 0.9004 | 0.0000 | 0.0000 | 0.0000 | EUMED  |
| FRA_WATKINS-007316 | 0.0000 | 0.0000 | 0.0000 | 0.8595 | 0.0000 | 0.1405 | 0.0000 | EUMED  |
| IND_WATKINS-007585 | 0.0806 | 0.0212 | 0.0000 | 0.8356 | 0.0000 | 0.0626 | 0.0000 | EUMED  |
| YUG_WATKINS-007295 | 0.0400 | 0.0000 | 0.0000 | 0.8348 | 0.0000 | 0.1252 | 0.0000 | EUMED  |
| BOS_DAS5-003394    | 0.1902 | 0.0000 | 0.0000 | 0.8097 | 0.0000 | 0.0000 | 0.0000 | EUMED  |
| IRN_WATKINS-007691 | 0.0000 | 0.0766 | 0.0212 | 0.7947 | 0.0000 | 0.0978 | 0.0097 | EUMED  |
| CHL_DAS5-001008    | 0.1178 | 0.0000 | 0.0000 | 0.7789 | 0.0000 | 0.1033 | 0.0000 | EUMED  |
| MAC_DAS5-004268    | 0.0000 | 0.0000 | 0.0000 | 0.7729 | 0.0000 | 0.2271 | 0.0000 | EUMED  |
| YUG_WATKINS-007079 | 0.0000 | 0.0000 | 0.0000 | 0.7724 | 0.0000 | 0.2276 | 0.0000 | EUMED  |
| POR_WATKINS-007500 | 0.0574 | 0.0000 | 0.0000 | 0.7700 | 0.0000 | 0.1523 | 0.0202 | EUMED  |
| GEO_DAS5-003574    | 0.0000 | 0.0000 | 0.0000 | 0.7589 | 0.0000 | 0.2411 | 0.0000 | EUMED  |
| BUL_WATKINS-007766 | 0.0000 | 0.0903 | 0.0000 | 0.7535 | 0.0000 | 0.1562 | 0.0000 | EUMED  |
| SPA_WATKINS-007572 | 0.0000 | 0.0784 | 0.0000 | 0.7531 | 0.0000 | 0.1685 | 0.0000 | EUMED  |
| IND_WATKINS-007800 | 0.0000 | 0.0990 | 0.0000 | 0.7451 | 0.0000 | 0.1558 | 0.0000 | EUMED  |
| MAC_DAS5-003778    | 0.0000 | 0.0145 | 0.0380 | 0.7081 | 0.0000 | 0.2394 | 0.0000 | EUMED  |
| BUR_DAS5-001036    | 0.1490 | 0.0000 | 0.0022 | 0.6955 | 0.0459 | 0.0000 | 0.1074 | EUMED  |
| GRE_WATKINS-007088 | 0.0197 | 0.3095 | 0.0000 | 0.6688 | 0.0000 | 0.0019 | 0.0000 | EUMED  |

| Accession          | Q1     | Q2     | Q3     | Q4     | Q5     | Q6     | Q7     | Subpop |
|--------------------|--------|--------|--------|--------|--------|--------|--------|--------|
| SPA_WATKINS-007449 | 0.0000 | 0.1781 | 0.0000 | 0.6677 | 0.0000 | 0.1542 | 0.0000 | EUMED  |
| SPA_WATKINS-007451 | 0.0080 | 0.0523 | 0.0000 | 0.6677 | 0.0076 | 0.2561 | 0.0083 | EUMED  |
| TUR_WSC-8-6        | 0.0745 | 0.0000 | 0.1200 | 0.6619 | 0.0000 | 0.0000 | 0.1436 | EUMED  |
| ITA_DAS5-004695    | 0.0785 | 0.2673 | 0.0000 | 0.6400 | 0.0141 | 0.0000 | 0.0000 | EUMED  |
| CHN_WATKINS-007248 | 0.0000 | 0.0000 | 0.0000 | 0.6330 | 0.0000 | 0.3614 | 0.0055 | EUMED  |
| MOR_WATKINS-007014 | 0.0000 | 0.0000 | 0.0000 | 0.6278 | 0.0000 | 0.3721 | 0.0000 | EUMED  |
| DEN_DAS5-004333    | 0.0097 | 0.0000 | 0.0040 | 0.6222 | 0.0000 | 0.3641 | 0.0000 | EUMED  |
| SPA_WATKINS-007452 | 0.0000 | 0.1280 | 0.0000 | 0.6177 | 0.0000 | 0.2543 | 0.0000 | EUMED  |
| LEB_DAS5-004337    | 0.1109 | 0.2783 | 0.0000 | 0.6107 | 0.0000 | 0.0000 | 0.0000 | EUMED  |
| FSV_DAS5-002165    | 0.1218 | 0.2234 | 0.0500 | 0.6048 | 0.0000 | 0.0000 | 0.0000 | EUMED  |
| ITA_WATKINS-007423 | 0.0000 | 0.2164 | 0.0000 | 0.6028 | 0.0000 | 0.1807 | 0.0000 | EUMED  |
| GER_DAS5-004694    | 0.0000 | 0.0000 | 0.0000 | 0.6025 | 0.0000 | 0.3974 | 0.0000 | EUMED  |
| PHI_DAS5-001051    | 0.0715 | 0.0000 | 0.2554 | 0.6020 | 0.0000 | 0.0000 | 0.0712 | EUMED  |
| SPA_WATKINS-007684 | 0.1210 | 0.0799 | 0.0577 | 0.5855 | 0.0292 | 0.1105 | 0.0162 | EUMED  |
| OMA_DAS5-001134    | 0.2996 | 0.0752 | 0.0182 | 0.5615 | 0.0000 | 0.0350 | 0.0105 | EUMED  |
| BOS_DAS5-003393    | 0.0000 | 0.0000 | 0.0130 | 0.5551 | 0.0000 | 0.4264 | 0.0055 | EUMED  |
| POR_WSC-8-2        | 0.0000 | 0.4474 | 0.0000 | 0.5526 | 0.0000 | 0.0000 | 0.0000 | EUMED  |
| POR_WATKINS-007494 | 0.0146 | 0.3586 | 0.0000 | 0.5292 | 0.0128 | 0.0000 | 0.0848 | EUMED  |
| POL_DAS5-002870    | 0.0000 | 0.4819 | 0.0000 | 0.5180 | 0.0000 | 0.0000 | 0.0000 | EUMED  |
| AFG_WATKINS-007048 | 0.0000 | 0.1949 | 0.0508 | 0.5153 | 0.0000 | 0.1958 | 0.0432 | EUMED  |
| MOR_DAS5-003849    | 0.0468 | 0.3585 | 0.0166 | 0.5051 | 0.0232 | 0.0000 | 0.0498 | EUMED  |
| IND_WATKINS-007339 | 0.0062 | 0.0944 | 0.1091 | 0.4980 | 0.0000 | 0.1440 | 0.1483 | EUMED  |
| DEN_DAS5-003493    | 0.0014 | 0.1002 | 0.0959 | 0.4765 | 0.0659 | 0.2601 | 0.0000 | EUMED  |
| FSV_DAS5-003243    | 0.0576 | 0.0000 | 0.3848 | 0.4703 | 0.0000 | 0.0746 | 0.0126 | EUMED  |
| YUG_WATKINS-007745 | 0.1040 | 0.0007 | 0.0091 | 0.4683 | 0.0037 | 0.3887 | 0.0255 | EUMED  |
| CHN_WATKINS-007209 | 0.0000 | 0.1500 | 0.2944 | 0.4587 | 0.0000 | 0.0000 | 0.0969 | EUMED  |
| CHN_WATKINS-007260 | 0.0000 | 0.0000 | 0.1238 | 0.4522 | 0.0000 | 0.2307 | 0.1932 | EUMED  |
| BOL_DAS5-003387    | 0.2825 | 0.0000 | 0.1251 | 0.4433 | 0.0195 | 0.0000 | 0.1296 | EUMED  |
| CHN_WATKINS-007202 | 0.1151 | 0.3942 | 0.0000 | 0.4230 | 0.0000 | 0.0678 | 0.0000 | EUMED  |
| BOS_DAS5-004665    | 0.1196 | 0.1164 | 0.0787 | 0.4190 | 0.0250 | 0.1436 | 0.0977 | EUMED  |
| BOS_DAS5-003388    | 0.0559 | 0.2453 | 0.0457 | 0.4163 | 0.0000 | 0.2367 | 0.0000 | EUMED  |
| CHN_WATKINS-007272 | 0.0506 | 0.0000 | 0.1122 | 0.4153 | 0.0000 | 0.1839 | 0.2379 | EUMED  |
| MOR_DAS5-002766    | 0.2319 | 0.0000 | 0.0000 | 0.3940 | 0.0000 | 0.1703 | 0.2037 | EUMED  |
| BEL_DAS5-003370    | 0.0292 | 0.0923 | 0.0353 | 0.3636 | 0.3073 | 0.1140 | 0.0582 | EUMED  |
| CHL_DAS5-004288    | 0.0000 | 0.0486 | 0.0000 | 0.3585 | 0.2632 | 0.3230 | 0.0067 | EUMED  |
| CHN_WATKINS-007256 | 0.0246 | 0.0112 | 0.2391 | 0.3422 | 0.0077 | 0.1385 | 0.2368 | EUMED  |
| CHN_WATKINS-007250 | 0.0000 | 0.0000 | 0.1858 | 0.3379 | 0.0000 | 0.1795 | 0.2968 | EUMED  |
| SPA_DAS5-004493    | 0.0000 | 0.2623 | 0.0000 | 0.3210 | 0.0551 | 0.2811 | 0.0804 | EUMED  |
| BEL_DAS5-004418    | 0.0000 | 0.0250 | 0.1047 | 0.3200 | 0.2842 | 0.1904 | 0.0757 | EUMED  |
| YEM_DAS5-004245    | 0.2321 | 0.0862 | 0.2769 | 0.3181 | 0.0000 | 0.0000 | 0.0866 | EUMED  |
| LEB_DAS5-001551    | 0.2572 | 0.1030 | 0.1515 | 0.2996 | 0.0344 | 0.0432 | 0.1111 | EUMED  |

| Accession          | Q1     | Q2     | Q3     | Q4     | Q5     | Q6     | Q7     | Subpop |
|--------------------|--------|--------|--------|--------|--------|--------|--------|--------|
| TUR_DAS5-002287    | 0.0000 | 0.0000 | 0.0000 | 0.0000 | 0.9999 | 0.0000 | 0.0000 | FSV    |
| FSV_DAS5-002515    | 0.0000 | 0.0000 | 0.0000 | 0.0000 | 0.9999 | 0.0000 | 0.0000 | FSV    |
| ITA_DAS5-002933    | 0.0000 | 0.0000 | 0.0000 | 0.0000 | 0.9999 | 0.0000 | 0.0000 | FSV    |
| MON_DAS5-004285    | 0.0000 | 0.0000 | 0.0000 | 0.0000 | 0.9999 | 0.0000 | 0.0000 | FSV    |
| FSV_DAS5-002303    | 0.0000 | 0.0000 | 0.0000 | 0.0000 | 0.9999 | 0.0000 | 0.0000 | FSV    |
| GER_WATKINS-007811 | 0.0000 | 0.0000 | 0.0084 | 0.0000 | 0.8863 | 0.0000 | 0.1053 | FSV    |
| SPA_DAS5-002916    | 0.0000 | 0.1007 | 0.0000 | 0.0000 | 0.8489 | 0.0503 | 0.0000 | FSV    |
| YEM_DAS5-004244    | 0.0138 | 0.0000 | 0.1216 | 0.0000 | 0.7776 | 0.0000 | 0.0869 | FSV    |
| SPA_DAS5-004007    | 0.0000 | 0.0000 | 0.0000 | 0.2668 | 0.6978 | 0.0000 | 0.0353 | FSV    |
| ETH_DAS5-001932    | 0.0000 | 0.0000 | 0.2197 | 0.0000 | 0.6201 | 0.0308 | 0.1294 | FSV    |
| POR_DAS5-004676    | 0.0000 | 0.3695 | 0.0000 | 0.0889 | 0.4841 | 0.0351 | 0.0224 | FSV    |
| SPA_DAS5-004018    | 0.0098 | 0.0988 | 0.0997 | 0.2723 | 0.4330 | 0.0397 | 0.0466 | FSV    |
| POR_WATKINS-007497 | 0.0000 | 0.3449 | 0.0000 | 0.1849 | 0.4212 | 0.0075 | 0.0415 | FSV    |
| CHN_WATKINS-007212 | 0.0000 | 0.0000 | 0.0000 | 0.3945 | 0.3966 | 0.1542 | 0.0547 | FSV    |
| SER_DAS5-003993    | 0.0164 | 0.0000 | 0.1431 | 0.2645 | 0.3194 | 0.2015 | 0.0551 | FSV    |
| USA_DAS5-004691    | 0.0000 | 0.0000 | 0.1341 | 0.2733 | 0.3162 | 0.1925 | 0.0838 | FSV    |
| ALG_DAS5-001609    | 0.0000 | 0.9999 | 0.0000 | 0.0000 | 0.0000 | 0.0000 | 0.0000 | MED    |
| ALG_WATKINS-007122 | 0.0000 | 0.9999 | 0.0000 | 0.0000 | 0.0000 | 0.0000 | 0.0000 | MED    |
| SPA_WATKINS-007443 | 0.0000 | 0.9999 | 0.0000 | 0.0000 | 0.0000 | 0.0000 | 0.0000 | MED    |
| AFG_WATKINS-007117 | 0.0000 | 0.9634 | 0.0000 | 0.0365 | 0.0000 | 0.0000 | 0.0000 | MED    |
| TUN_WATKINS-007035 | 0.0000 | 0.9472 | 0.0000 | 0.0528 | 0.0000 | 0.0000 | 0.0000 | MED    |
| ISR_DAS5-003704    | 0.0000 | 0.9161 | 0.0544 | 0.0000 | 0.0295 | 0.0000 | 0.0000 | MED    |
| ISR_DAS5-001203    | 0.0000 | 0.8905 | 0.0000 | 0.0000 | 0.1094 | 0.0000 | 0.0000 | MED    |
| TUR_WATKINS-007030 | 0.0000 | 0.8894 | 0.0071 | 0.0000 | 0.0000 | 0.0953 | 0.0082 | MED    |
| GRE_WATKINS-007090 | 0.0000 | 0.8698 | 0.0000 | 0.0000 | 0.1301 | 0.0000 | 0.0000 | MED    |
| SPA_WATKINS-007127 | 0.0000 | 0.8534 | 0.0250 | 0.0345 | 0.0000 | 0.0871 | 0.0000 | MED    |
| SYR_WATKINS-007009 | 0.0000 | 0.8404 | 0.1596 | 0.0000 | 0.0000 | 0.0000 | 0.0000 | MED    |
| SPA_WATKINS-007187 | 0.0000 | 0.8310 | 0.0191 | 0.0000 | 0.1101 | 0.0156 | 0.0241 | MED    |
| CYP_WSC-7-4        | 0.0000 | 0.8296 | 0.0570 | 0.0000 | 0.1134 | 0.0000 | 0.0000 | MED    |
| PRK_WSC-8-1        | 0.0000 | 0.8279 | 0.0000 | 0.1151 | 0.0570 | 0.0000 | 0.0000 | MED    |
| MOR_DAS5-003835    | 0.0196 | 0.8247 | 0.0000 | 0.0000 | 0.0000 | 0.0000 | 0.1557 | MED    |
| CYP_WATKINS-007826 | 0.0000 | 0.8138 | 0.1557 | 0.0000 | 0.0000 | 0.0305 | 0.0000 | MED    |
| SPA_DAS5-004012    | 0.0000 | 0.8128 | 0.0000 | 0.0004 | 0.0000 | 0.1868 | 0.0000 | MED    |
| SPA_WATKINS-007188 | 0.0000 | 0.7870 | 0.0072 | 0.0085 | 0.1381 | 0.0561 | 0.0032 | MED    |
| MEX_Cltr-2804      | 0.0016 | 0.7738 | 0.0213 | 0.0931 | 0.0462 | 0.0639 | 0.0000 | MED    |
| GRE_DAS5-001641    | 0.0318 | 0.7715 | 0.0255 | 0.0277 | 0.0814 | 0.0621 | 0.0000 | MED    |
| CYP_DAS5-003480    | 0.0000 | 0.7626 | 0.1406 | 0.0328 | 0.0000 | 0.0640 | 0.0000 | MED    |
| KEN_DAS5-001809    | 0.0000 | 0.7613 | 0.0000 | 0.0000 | 0.2169 | 0.0000 | 0.0218 | MED    |
| MOR_DAS5-004265    | 0.0000 | 0.6941 | 0.2095 | 0.0000 | 0.0443 | 0.0000 | 0.0521 | MED    |
| SPA_WATKINS-007677 | 0.0000 | 0.6906 | 0.0000 | 0.1040 | 0.0000 | 0.2053 | 0.0000 | MED    |
| SPA_DAS5-001212    | 0.0000 | 0.6781 | 0.0244 | 0.0715 | 0.2004 | 0.0256 | 0.0000 | MED    |

| Accession          | Q1     | Q2     | Q3     | Q4     | Q5     | Q6     | Q7     | Subpop |
|--------------------|--------|--------|--------|--------|--------|--------|--------|--------|
| GRE_WSC-7-3        | 0.0000 | 0.6702 | 0.0000 | 0.2762 | 0.0296 | 0.0239 | 0.0000 | MED    |
| ECU_DAS5-003501    | 0.0000 | 0.6445 | 0.0690 | 0.0000 | 0.2739 | 0.0000 | 0.0126 | MED    |
| TUN_DAS5-001935    | 0.0000 | 0.6374 | 0.1644 | 0.0170 | 0.0434 | 0.1378 | 0.0000 | MED    |
| GRE_WATKINS-007002 | 0.0844 | 0.6350 | 0.0000 | 0.1439 | 0.0000 | 0.0163 | 0.1204 | MED    |
| SPA_WATKINS-007558 | 0.0000 | 0.6283 | 0.0230 | 0.2558 | 0.0000 | 0.0928 | 0.0000 | MED    |
| GRE_WATKINS-007077 | 0.0000 | 0.6025 | 0.0000 | 0.3142 | 0.0000 | 0.0833 | 0.0000 | MED    |
| POR_DAS5-001924    | 0.0036 | 0.5997 | 0.0000 | 0.2701 | 0.1265 | 0.0000 | 0.0000 | MED    |
| EGY_WATKINS-007542 | 0.0492 | 0.5970 | 0.0068 | 0.1980 | 0.0000 | 0.1489 | 0.0000 | MED    |
| SPA_DAS5-004020    | 0.0000 | 0.5768 | 0.0000 | 0.3968 | 0.0264 | 0.0000 | 0.0000 | MED    |
| MOR_DAS5-004663    | 0.0000 | 0.5725 | 0.0675 | 0.0000 | 0.1320 | 0.1866 | 0.0414 | MED    |
| TUN_WATKINS-007799 | 0.0000 | 0.5721 | 0.0519 | 0.1570 | 0.1036 | 0.0459 | 0.0695 | MED    |
| AUS_WATKINS-007156 | 0.0412 | 0.5626 | 0.0000 | 0.3721 | 0.0000 | 0.0241 | 0.0000 | MED    |
| PER_DAS5-004698    | 0.0000 | 0.5533 | 0.0000 | 0.0947 | 0.3450 | 0.0000 | 0.0070 | MED    |
| ANG_WSC-8-8        | 0.0552 | 0.5416 | 0.0000 | 0.2212 | 0.0000 | 0.0000 | 0.1820 | MED    |
| GRE_WATKINS-007093 | 0.0000 | 0.5400 | 0.0000 | 0.4600 | 0.0000 | 0.0000 | 0.0000 | MED    |
| BRA_WSC-8-9        | 0.0410 | 0.5362 | 0.0000 | 0.4199 | 0.0029 | 0.0000 | 0.0000 | MED    |
| TUR_WSC-8-4        | 0.0000 | 0.5327 | 0.3580 | 0.0000 | 0.0776 | 0.0317 | 0.0000 | MED    |
| URU_PI-43355       | 0.0000 | 0.5252 | 0.0000 | 0.4748 | 0.0000 | 0.0000 | 0.0000 | MED    |
| GRE_WATKINS-007001 | 0.0000 | 0.5170 | 0.0000 | 0.4805 | 0.0024 | 0.0000 | 0.0000 | MED    |
| SPA_WATKINS-007455 | 0.0000 | 0.5140 | 0.0000 | 0.3997 | 0.0000 | 0.0862 | 0.0000 | MED    |
| ANG_DAS5-001276    | 0.0303 | 0.5124 | 0.0000 | 0.2518 | 0.0064 | 0.0000 | 0.1991 | MED    |
| GUA_WSC-8-3        | 0.0000 | 0.5010 | 0.0286 | 0.1779 | 0.1130 | 0.1796 | 0.0000 | MED    |
| TUN_DAS5-001399    | 0.2864 | 0.4849 | 0.0000 | 0.0000 | 0.1659 | 0.0000 | 0.0628 | MED    |
| TUR_DAS5-004483    | 0.0000 | 0.4814 | 0.3385 | 0.0000 | 0.1354 | 0.0446 | 0.0000 | MED    |
| SPA_WATKINS-007520 | 0.0000 | 0.4755 | 0.0000 | 0.2404 | 0.0000 | 0.2841 | 0.0000 | MED    |
| CRO_DAS5-004316    | 0.0000 | 0.4659 | 0.0000 | 0.2621 | 0.0000 | 0.2720 | 0.0000 | MED    |
| IRQ_WATKINS-007641 | 0.1140 | 0.4578 | 0.0000 | 0.1795 | 0.0000 | 0.2487 | 0.0000 | MED    |
| FSV_DAS5-003176    | 0.0267 | 0.4516 | 0.0000 | 0.4207 | 0.0170 | 0.0839 | 0.0000 | MED    |
| GUA_DAS5-003601    | 0.0000 | 0.4479 | 0.0965 | 0.0735 | 0.2841 | 0.0872 | 0.0107 | MED    |
| GUA_DAS5-004664    | 0.0647 | 0.4472 | 0.1648 | 0.1097 | 0.1025 | 0.1110 | 0.0000 | MED    |
| AUS_WATKINS-007148 | 0.0000 | 0.4360 | 0.0533 | 0.2006 | 0.0000 | 0.3101 | 0.0000 | MED    |
| IRQ_WATKINS-007638 | 0.0000 | 0.4321 | 0.1440 | 0.4224 | 0.0015 | 0.0000 | 0.0000 | MED    |
| SYR_DAS5-004059    | 0.0000 | 0.4259 | 0.3965 | 0.0000 | 0.0000 | 0.1776 | 0.0000 | MED    |
| CYP_DAS5-001320    | 0.1205 | 0.4157 | 0.1056 | 0.2671 | 0.0911 | 0.0000 | 0.0000 | MED    |
| IND_WATKINS-007388 | 0.0103 | 0.4135 | 0.0882 | 0.1005 | 0.0000 | 0.1338 | 0.2538 | MED    |
| CHN_WATKINS-007261 | 0.0232 | 0.3776 | 0.0714 | 0.2996 | 0.0061 | 0.1253 | 0.0969 | MED    |
| SPA_WATKINS-007430 | 0.0000 | 0.3635 | 0.1025 | 0.2845 | 0.0000 | 0.2494 | 0.0000 | MED    |
| VEN_DAS5-001433    | 0.2169 | 0.2351 | 0.1583 | 0.1191 | 0.0734 | 0.0681 | 0.1291 | MED    |
| BOL_DAS5-001094    | 0.0000 | 0.0000 | 0.9999 | 0.0000 | 0.0000 | 0.0000 | 0.0000 | OLDWP  |
| TKM_WSC-7-1        | 0.0000 | 0.0000 | 0.9999 | 0.0000 | 0.0000 | 0.0000 | 0.0000 | OLDWP  |
| CHA_DAS5-001251    | 0.0000 | 0.0000 | 0.9919 | 0.0000 | 0.0080 | 0.0000 | 0.0000 | OLDWP  |

| Accession          | Q1     | Q2     | Q3     | Q4     | Q5     | Q6     | Q7     | Subpop |
|--------------------|--------|--------|--------|--------|--------|--------|--------|--------|
| TAN_DAS5-001205    | 0.0000 | 0.0168 | 0.9736 | 0.0000 | 0.0096 | 0.0000 | 0.0000 | OLDWP  |
| AUT_DAS5-001116    | 0.0000 | 0.0273 | 0.9726 | 0.0000 | 0.0000 | 0.0000 | 0.0000 | OLDWP  |
| AFG_PI-268466      | 0.0000 | 0.0000 | 0.9625 | 0.0000 | 0.0298 | 0.0076 | 0.0000 | OLDWP  |
| IRQ_WSC-7-8        | 0.0000 | 0.0072 | 0.9475 | 0.0000 | 0.0185 | 0.0267 | 0.0000 | OLDWP  |
| FSV_WATKINS-007827 | 0.0000 | 0.0000 | 0.9349 | 0.0000 | 0.0000 | 0.0000 | 0.0651 | OLDWP  |
| NIG_DAS5-003881    | 0.0000 | 0.0575 | 0.9330 | 0.0000 | 0.0095 | 0.0000 | 0.0000 | OLDWP  |
| IRQ_DAS5-003689    | 0.0000 | 0.0000 | 0.9288 | 0.0185 | 0.0101 | 0.0000 | 0.0425 | OLDWP  |
| IRN_WATKINS-007702 | 0.0000 | 0.0000 | 0.9139 | 0.0000 | 0.0000 | 0.0000 | 0.0860 | OLDWP  |
| UZB_DAS5-004240    | 0.0000 | 0.0000 | 0.9128 | 0.0000 | 0.0000 | 0.0000 | 0.0871 | OLDWP  |
| FSV_WATKINS-007789 | 0.0000 | 0.0000 | 0.8972 | 0.0000 | 0.0000 | 0.1027 | 0.0000 | OLDWP  |
| UZB_DAS5-001540    | 0.0000 | 0.0000 | 0.8919 | 0.0107 | 0.0000 | 0.0280 | 0.0695 | OLDWP  |
| AFG_DAS5-003288    | 0.0000 | 0.0591 | 0.8696 | 0.0000 | 0.0000 | 0.0000 | 0.0713 | OLDWP  |
| AFG_WATKINS-007049 | 0.0000 | 0.0000 | 0.8603 | 0.0000 | 0.0000 | 0.0000 | 0.1397 | OLDWP  |
| IRQ_DAS5-001458    | 0.0000 | 0.0452 | 0.8538 | 0.0000 | 0.0211 | 0.0799 | 0.0000 | OLDWP  |
| ISR_PI-94567       | 0.0000 | 0.0000 | 0.8532 | 0.0000 | 0.0000 | 0.0000 | 0.1468 | OLDWP  |
| AFG_DAS5-004583    | 0.0000 | 0.0000 | 0.8518 | 0.0000 | 0.0000 | 0.0000 | 0.1482 | OLDWP  |
| IRN_WATKINS-007708 | 0.0000 | 0.0000 | 0.8456 | 0.0309 | 0.0000 | 0.0299 | 0.0936 | OLDWP  |
| FSV_WATKINS-007547 | 0.0000 | 0.0000 | 0.8327 | 0.0000 | 0.0000 | 0.0000 | 0.1673 | OLDWP  |
| UZB_DAS5-001984    | 0.0000 | 0.0000 | 0.8175 | 0.0000 | 0.0000 | 0.0000 | 0.1824 | OLDWP  |
| AFG_WSC-4-2        | 0.0000 | 0.0000 | 0.8169 | 0.0000 | 0.0000 | 0.0000 | 0.1831 | OLDWP  |
| UZB_PI-9791        | 0.0000 | 0.0000 | 0.8072 | 0.0000 | 0.0000 | 0.0000 | 0.1928 | OLDWP  |
| IRN_WATKINS-007470 | 0.0238 | 0.0000 | 0.8056 | 0.0000 | 0.0000 | 0.1537 | 0.0169 | OLDWP  |
| YEM_DAS5-004253    | 0.0024 | 0.0658 | 0.7913 | 0.0130 | 0.0247 | 0.0025 | 0.1003 | OLDWP  |
| IRN_DAS5-003654    | 0.0000 | 0.0000 | 0.7913 | 0.0000 | 0.0000 | 0.0000 | 0.2087 | OLDWP  |
| IRN_DAS5-003641    | 0.0000 | 0.0820 | 0.7832 | 0.0000 | 0.0000 | 0.1348 | 0.0000 | OLDWP  |
| TUN_DAS5-004072    | 0.0000 | 0.1426 | 0.7789 | 0.0000 | 0.0785 | 0.0000 | 0.0000 | OLDWP  |
| ETH_WSC-7-6        | 0.0000 | 0.0612 | 0.7745 | 0.0000 | 0.0427 | 0.1001 | 0.0214 | OLDWP  |
| FSV_WATKINS-007137 | 0.0053 | 0.0000 | 0.7681 | 0.0000 | 0.0000 | 0.2265 | 0.0000 | OLDWP  |
| ARM_DAS5-003308    | 0.0430 | 0.0150 | 0.7655 | 0.0000 | 0.0000 | 0.1764 | 0.0000 | OLDWP  |
| YEM_DAS5-001244    | 0.1193 | 0.0000 | 0.7642 | 0.0742 | 0.0000 | 0.0000 | 0.0423 | OLDWP  |
| YEM_DAS5-004256    | 0.0000 | 0.0705 | 0.7599 | 0.0000 | 0.0388 | 0.0000 | 0.1308 | OLDWP  |
| PAK_Cltr-15134     | 0.0000 | 0.0000 | 0.7596 | 0.0000 | 0.0000 | 0.0000 | 0.2403 | OLDWP  |
| SUD_WSC-4-5        | 0.0064 | 0.0000 | 0.7454 | 0.0518 | 0.0007 | 0.0000 | 0.1958 | OLDWP  |
| FSV_WATKINS-007548 | 0.0452 | 0.0545 | 0.7452 | 0.0000 | 0.0000 | 0.1550 | 0.0000 | OLDWP  |
| FSV_WATKINS-007194 | 0.0000 | 0.1247 | 0.7452 | 0.0000 | 0.0000 | 0.1301 | 0.0000 | OLDWP  |
| IRN_DAS5-003660    | 0.0122 | 0.0000 | 0.7448 | 0.0607 | 0.0000 | 0.0026 | 0.1797 | OLDWP  |
| IND_WATKINS-007581 | 0.0000 | 0.0135 | 0.7436 | 0.0000 | 0.0608 | 0.0719 | 0.1102 | OLDWP  |
| AFG_DAS5-003279    | 0.0000 | 0.0000 | 0.7330 | 0.0000 | 0.0000 | 0.0000 | 0.2669 | OLDWP  |
| AZE_DAS5-004465    | 0.0578 | 0.0284 | 0.7316 | 0.0000 | 0.0000 | 0.1822 | 0.0000 | OLDWP  |
| AFG_DAS5-004674    | 0.0000 | 0.0000 | 0.7293 | 0.0000 | 0.0000 | 0.0000 | 0.2707 | OLDWP  |
| ETH_DAS5-003524    | 0.0310 | 0.1053 | 0.7262 | 0.0000 | 0.0395 | 0.0980 | 0.0000 | OLDWP  |

| Accession          | Q1     | Q2     | Q3     | Q4     | Q5     | Q6     | Q7     | Subpop |
|--------------------|--------|--------|--------|--------|--------|--------|--------|--------|
| AFG_WSC-4-9        | 0.0000 | 0.0000 | 0.7213 | 0.0038 | 0.0000 | 0.0000 | 0.2748 | OLDWP  |
| AZE_WATKINS-007784 | 0.1301 | 0.0000 | 0.6740 | 0.0551 | 0.0072 | 0.1179 | 0.0158 | OLDWP  |
| GEO_DAS5-003570    | 0.0432 | 0.0278 | 0.6735 | 0.0000 | 0.0000 | 0.2555 | 0.0000 | OLDWP  |
| HON_DAS5-001079    | 0.0000 | 0.1994 | 0.6590 | 0.0516 | 0.0245 | 0.0000 | 0.0655 | OLDWP  |
| FSV_WATKINS-007191 | 0.0509 | 0.0186 | 0.6437 | 0.0000 | 0.0000 | 0.2867 | 0.0000 | OLDWP  |
| ERI_DAS5-001368    | 0.0505 | 0.1365 | 0.6013 | 0.0000 | 0.0305 | 0.1636 | 0.0177 | OLDWP  |
| IRN_DAS5-003661    | 0.0000 | 0.2281 | 0.5992 | 0.0000 | 0.0000 | 0.1726 | 0.0000 | OLDWP  |
| CHN_WATKINS-007220 | 0.0000 | 0.0000 | 0.5518 | 0.0000 | 0.0000 | 0.0000 | 0.4481 | OLDWP  |
| SAU_DAS5-003980    | 0.0116 | 0.3059 | 0.5269 | 0.0000 | 0.0079 | 0.1441 | 0.0036 | OLDWP  |
| TAJ_DAS5-001916    | 0.0000 | 0.0000 | 0.5225 | 0.0000 | 0.0000 | 0.0000 | 0.4775 | OLDWP  |
| BUR_DAS5-001521    | 0.0000 | 0.0000 | 0.5192 | 0.0000 | 0.0000 | 0.0000 | 0.4807 | OLDWP  |
| ALG_DAS5-004460    | 0.0000 | 0.3720 | 0.5176 | 0.0000 | 0.0923 | 0.0000 | 0.0181 | OLDWP  |
| RUS_Cltr-7635      | 0.1234 | 0.0517 | 0.5162 | 0.0000 | 0.0000 | 0.3086 | 0.0000 | OLDWP  |
| IRA_WSC-7-2        | 0.0000 | 0.2847 | 0.5137 | 0.0000 | 0.0000 | 0.2016 | 0.0000 | OLDWP  |
| ALG_WSC-5-12       | 0.0000 | 0.3350 | 0.4995 | 0.0000 | 0.1001 | 0.0000 | 0.0654 | OLDWP  |
| IND_WATKINS-007401 | 0.0314 | 0.0000 | 0.4853 | 0.1169 | 0.0050 | 0.0913 | 0.2702 | OLDWP  |
| FSV_DAS5-003170    | 0.0000 | 0.0000 | 0.4851 | 0.1930 | 0.0000 | 0.2720 | 0.0498 | OLDWP  |
| POL_DAS5-002871    | 0.0841 | 0.0402 | 0.4581 | 0.3308 | 0.0000 | 0.0868 | 0.0000 | OLDWP  |
| TKM_DAS5-001564    | 0.0000 | 0.2256 | 0.4545 | 0.0000 | 0.0000 | 0.3199 | 0.0000 | OLDWP  |
| SPA_WATKINS-007661 | 0.0000 | 0.0916 | 0.4099 | 0.3969 | 0.0000 | 0.1016 | 0.0000 | OLDWP  |
| IRN_DAS5-003670    | 0.0000 | 0.3134 | 0.4072 | 0.0000 | 0.0000 | 0.2794 | 0.0000 | OLDWP  |
| GEO_WATKINS-007824 | 0.1198 | 0.1571 | 0.4050 | 0.0000 | 0.0000 | 0.3181 | 0.0000 | OLDWP  |
| IRQ_WATKINS-007640 | 0.0793 | 0.3177 | 0.3975 | 0.0128 | 0.0564 | 0.1034 | 0.0331 | OLDWP  |
| ROM_DAS5-002944    | 0.0000 | 0.1044 | 0.3836 | 0.1723 | 0.0000 | 0.3397 | 0.0000 | OLDWP  |
| FSV_DAS5-002492    | 0.1198 | 0.2024 | 0.3804 | 0.0793 | 0.0000 | 0.1444 | 0.0736 | OLDWP  |
| CRO_Cltr-11223     | 0.1757 | 0.0272 | 0.3798 | 0.0000 | 0.0000 | 0.4173 | 0.0000 | OLDWP  |
| GEO_DAS5-003577    | 0.0000 | 0.1950 | 0.3460 | 0.0877 | 0.2209 | 0.0796 | 0.0708 | OLDWP  |
| BUR_DAS5-001007    | 0.0000 | 0.0000 | 0.0000 | 0.0000 | 0.0000 | 0.0000 | 0.9999 | SAS    |
| PAK_DAS5-001341    | 0.0000 | 0.0000 | 0.0000 | 0.0000 | 0.0000 | 0.0000 | 0.9999 | SAS    |
| PAR_DAS5-001524    | 0.0000 | 0.0000 | 0.0000 | 0.0000 | 0.0000 | 0.0000 | 0.9999 | SAS    |
| IND_DAS5-001550    | 0.0000 | 0.0000 | 0.0000 | 0.0000 | 0.0000 | 0.0000 | 0.9999 | SAS    |
| IDN_DAS5-001690    | 0.0000 | 0.0000 | 0.0000 | 0.0000 | 0.0000 | 0.0000 | 0.9999 | SAS    |
| ANG_DAS5-001803    | 0.0000 | 0.0000 | 0.0000 | 0.0000 | 0.0000 | 0.0000 | 0.9999 | SAS    |
| NEP_WSC-4-3        | 0.0000 | 0.0000 | 0.0000 | 0.0000 | 0.0000 | 0.0000 | 0.9999 | SAS    |
| IRQ_DAS5-003690    | 0.0000 | 0.0000 | 0.0000 | 0.0000 | 0.0000 | 0.0000 | 0.9999 | SAS    |
| MWI_PI-61693       | 0.0000 | 0.0000 | 0.0172 | 0.0000 | 0.0000 | 0.0000 | 0.9827 | SAS    |
| NEP_WSC-5-13       | 0.0000 | 0.0000 | 0.0352 | 0.0000 | 0.0000 | 0.0439 | 0.9209 | SAS    |
| JOR_PI-283147      | 0.0783 | 0.0699 | 0.0000 | 0.0000 | 0.0000 | 0.0000 | 0.8518 | SAS    |
| BHU_WSC-4-6        | 0.0000 | 0.0000 | 0.1938 | 0.0000 | 0.0000 | 0.0000 | 0.8061 | SAS    |
| OMA_DAS5-001657    | 0.0000 | 0.0000 | 0.2071 | 0.0000 | 0.0000 | 0.0000 | 0.7928 | SAS    |
| IND_WATKINS-007606 | 0.0000 | 0.1247 | 0.0000 | 0.0378 | 0.0000 | 0.0903 | 0.7471 | SAS    |

| Accession          | Q1     | Q2     | Q3     | Q4     | Q5     | Q6     | Q7     | Subpop |
|--------------------|--------|--------|--------|--------|--------|--------|--------|--------|
| NEP_DAS5-002811    | 0.0000 | 0.0000 | 0.2590 | 0.0000 | 0.0000 | 0.0000 | 0.7410 | SAS    |
| MLI_DAS5-001100    | 0.2901 | 0.0000 | 0.0000 | 0.0000 | 0.0000 | 0.0000 | 0.7098 | SAS    |
| IND_WSC-8-5        | 0.3003 | 0.0000 | 0.0000 | 0.0000 | 0.0000 | 0.0000 | 0.6997 | SAS    |
| IND_WATKINS-007398 | 0.0930 | 0.1014 | 0.0000 | 0.0000 | 0.0000 | 0.1196 | 0.6860 | SAS    |
| EGY_PI-220431      | 0.3026 | 0.0172 | 0.0000 | 0.0000 | 0.0000 | 0.0000 | 0.6802 | SAS    |
| CHN_DAS5-003455    | 0.0000 | 0.0000 | 0.4530 | 0.0000 | 0.0000 | 0.0000 | 0.5469 | SAS    |
| ROM_WATKINS-007510 | 0.0000 | 0.0000 | 0.4594 | 0.0000 | 0.0000 | 0.0000 | 0.5406 | SAS    |
| IND_WATKINS-007350 | 0.0150 | 0.1783 | 0.0434 | 0.2262 | 0.0000 | 0.0000 | 0.5370 | SAS    |
| UNK_DAS5-004209    | 0.0000 | 0.0000 | 0.4483 | 0.0169 | 0.0000 | 0.0000 | 0.5347 | SAS    |
| PHI_Cltr-4175      | 0.0000 | 0.0000 | 0.4703 | 0.0000 | 0.0000 | 0.0000 | 0.5296 | SAS    |
| CHN_WATKINS-007263 | 0.0167 | 0.0006 | 0.3911 | 0.0368 | 0.0278 | 0.0048 | 0.5220 | SAS    |
| CHN_WATKINS-007210 | 0.0000 | 0.0000 | 0.4893 | 0.0000 | 0.0000 | 0.0000 | 0.5106 | SAS    |
| SUD_DAS5-001470    | 0.1662 | 0.0599 | 0.0000 | 0.0000 | 0.2822 | 0.0000 | 0.4917 | SAS    |
| IND_WATKINS-007395 | 0.0000 | 0.0000 | 0.0000 | 0.4233 | 0.0000 | 0.1137 | 0.4630 | SAS    |
| MEX_DAS5-002004    | 0.2566 | 0.1042 | 0.0000 | 0.0976 | 0.1608 | 0.0000 | 0.3809 | SAS    |
| IND_WATKINS-007383 | 0.0000 | 0.0239 | 0.1142 | 0.2377 | 0.0000 | 0.2513 | 0.3730 | SAS    |
| TUN_WATKINS-007759 | 0.2244 | 0.2523 | 0.0000 | 0.0360 | 0.0000 | 0.1547 | 0.3326 | SAS    |
| BEL_DAS5-003360    | 0.1005 | 0.0437 | 0.0610 | 0.2134 | 0.1760 | 0.1084 | 0.2970 | SAS    |
| MOZ_DAS5-003855    | 0.9999 | 0.0000 | 0.0000 | 0.0000 | 0.0000 | 0.0000 | 0.0000 | WLDMix |
| SPA_WATKINS-007454 | 0.9999 | 0.0000 | 0.0000 | 0.0000 | 0.0000 | 0.0000 | 0.0000 | WLDMix |
| BOL_WSC-7-9        | 0.9999 | 0.0000 | 0.0000 | 0.0000 | 0.0000 | 0.0000 | 0.0000 | WLDMix |
| AUS_WATKINS-007166 | 0.8826 | 0.0000 | 0.0000 | 0.0000 | 0.0000 | 0.0000 | 0.1174 | WLDMix |
| TUN_DAS5-004078    | 0.8735 | 0.0000 | 0.0000 | 0.0000 | 0.0000 | 0.0000 | 0.1264 | WLDMix |
| POL_DAS5-002868    | 0.8385 | 0.0201 | 0.1041 | 0.0000 | 0.0000 | 0.0373 | 0.0000 | WLDMix |
| MOR_DAS5-003838    | 0.8236 | 0.0000 | 0.0000 | 0.0293 | 0.0000 | 0.0000 | 0.1471 | WLDMix |
| AUS_WATKINS-007162 | 0.8022 | 0.0000 | 0.0000 | 0.0000 | 0.0000 | 0.0000 | 0.1977 | WLDMix |
| CHN_WATKINS-007274 | 0.7000 | 0.0000 | 0.0000 | 0.0000 | 0.0000 | 0.3000 | 0.0000 | WLDMix |
| LIB_PI-54431       | 0.6879 | 0.0792 | 0.0000 | 0.0000 | 0.0000 | 0.0000 | 0.2328 | WLDMix |
| FSV_DAS5-003553    | 0.6436 | 0.1405 | 0.0000 | 0.2158 | 0.0000 | 0.0000 | 0.0000 | WLDMix |
| GEO_PI-572692      | 0.6428 | 0.0000 | 0.0000 | 0.0862 | 0.1176 | 0.1254 | 0.0279 | WLDMix |
| YEM_DAS5-004257    | 0.6381 | 0.0000 | 0.0025 | 0.1663 | 0.0000 | 0.0392 | 0.1538 | WLDMix |
| CHN_PI-70613       | 0.6296 | 0.0000 | 0.0000 | 0.0000 | 0.0000 | 0.3703 | 0.0000 | WLDMix |
| RUS_DAS5-003961    | 0.6274 | 0.0000 | 0.0000 | 0.0000 | 0.0000 | 0.3726 | 0.0000 | WLDMix |
| ERI_DAS5-001365    | 0.6100 | 0.0119 | 0.0945 | 0.0000 | 0.0679 | 0.0968 | 0.1189 | WLDMix |
| SWE_WSC-7-5        | 0.6001 | 0.1851 | 0.0000 | 0.0000 | 0.0000 | 0.0000 | 0.2148 | WLDMix |
| POL_DAS5-002869    | 0.5945 | 0.0000 | 0.0000 | 0.0000 | 0.0000 | 0.4055 | 0.0000 | WLDMix |
| COL_DAS5-003469    | 0.5741 | 0.0000 | 0.0000 | 0.2871 | 0.0000 | 0.0000 | 0.1388 | WLDMix |
| IND_WATKINS-007604 | 0.5709 | 0.0000 | 0.0000 | 0.0000 | 0.0000 | 0.4290 | 0.0000 | WLDMix |
| SAU_Cltr-15144     | 0.5469 | 0.0000 | 0.0000 | 0.0000 | 0.0107 | 0.0000 | 0.4424 | WLDMix |
| SPA_WATKINS-007518 | 0.5434 | 0.0000 | 0.0000 | 0.0000 | 0.4565 | 0.0000 | 0.0000 | WLDMix |
| EGY_DAS5-003502    | 0.5392 | 0.0000 | 0.0000 | 0.0000 | 0.0048 | 0.0000 | 0.4559 | WLDMix |

| Accession          | Q1     | Q2     | Q3     | Q4     | Q5     | Q6     | Q7     | Subpop |
|--------------------|--------|--------|--------|--------|--------|--------|--------|--------|
| COL_DAS5-003468    | 0.5363 | 0.0000 | 0.0026 | 0.3327 | 0.0147 | 0.0000 | 0.1138 | WLDMix |
| Bakhatwa           | 0.5251 | 0.0622 | 0.0082 | 0.2362 | 0.0235 | 0.0000 | 0.1449 | WLDMix |
| CAN_DAS5-001453    | 0.5075 | 0.0000 | 0.0000 | 0.0112 | 0.0000 | 0.1655 | 0.3158 | WLDMix |
| PER_WSC-5-7        | 0.5051 | 0.0329 | 0.0000 | 0.3327 | 0.0097 | 0.0000 | 0.1195 | WLDMix |
| EGY_DAS5-001149    | 0.5007 | 0.0000 | 0.0000 | 0.0227 | 0.0142 | 0.0000 | 0.4625 | WLDMix |
| SAU_DAS5-003977    | 0.4934 | 0.0000 | 0.0000 | 0.3364 | 0.0000 | 0.0000 | 0.1701 | WLDMix |
| SWI_WSC-4-4        | 0.4873 | 0.0378 | 0.0000 | 0.0843 | 0.1785 | 0.0000 | 0.2121 | WLDMix |
| ISR_DAS5-003707    | 0.4764 | 0.0593 | 0.0130 | 0.1035 | 0.0000 | 0.0000 | 0.3478 | WLDMix |
| FSV_WATKINS-007192 | 0.4412 | 0.3363 | 0.0000 | 0.0063 | 0.0000 | 0.0000 | 0.2163 | WLDMix |
| ANG_DAS5-001265    | 0.4367 | 0.1962 | 0.0009 | 0.0559 | 0.1491 | 0.0000 | 0.1611 | WLDMix |
| UNK_DAS5-004200    | 0.4314 | 0.0108 | 0.0029 | 0.1452 | 0.0000 | 0.2831 | 0.1266 | WLDMix |
| ARM_DAS5-003301    | 0.4268 | 0.0000 | 0.1108 | 0.2588 | 0.0375 | 0.0017 | 0.1643 | WLDMix |
| BUR_DAS5-003428    | 0.4240 | 0.0368 | 0.0702 | 0.1941 | 0.1254 | 0.0000 | 0.1496 | WLDMix |
| POR_DAS5-001382    | 0.4168 | 0.2887 | 0.0000 | 0.0907 | 0.1511 | 0.0000 | 0.0525 | WLDMix |
| JOR_DAS5-003735    | 0.3967 | 0.0515 | 0.0000 | 0.0000 | 0.2361 | 0.1040 | 0.2116 | WLDMix |
| AUS_WATKINS-007155 | 0.3933 | 0.0000 | 0.0000 | 0.2319 | 0.0000 | 0.3672 | 0.0076 | WLDMix |
| ETH_DAS5-001163    | 0.3728 | 0.0572 | 0.3050 | 0.0989 | 0.0146 | 0.1012 | 0.0503 | WLDMix |
| JAP_WSC-4-8        | 0.3503 | 0.2009 | 0.0000 | 0.1103 | 0.2057 | 0.0741 | 0.0587 | WLDMix |
| IND_DAS5-001047    | 0.3354 | 0.0371 | 0.2174 | 0.2112 | 0.0000 | 0.1989 | 0.0000 | WLDMix |
| BUR_DAS5-001002    | 0.3192 | 0.1279 | 0.0000 | 0.1903 | 0.1932 | 0.0000 | 0.1694 | WLDMix |
| ARG_DAS5-004653    | 0.3178 | 0.1304 | 0.0357 | 0.3352 | 0.0465 | 0.0000 | 0.1344 | WLDMix |

Accession: the first three letters indicate the United Nations country naming code from where the accession originated followed by accession name.



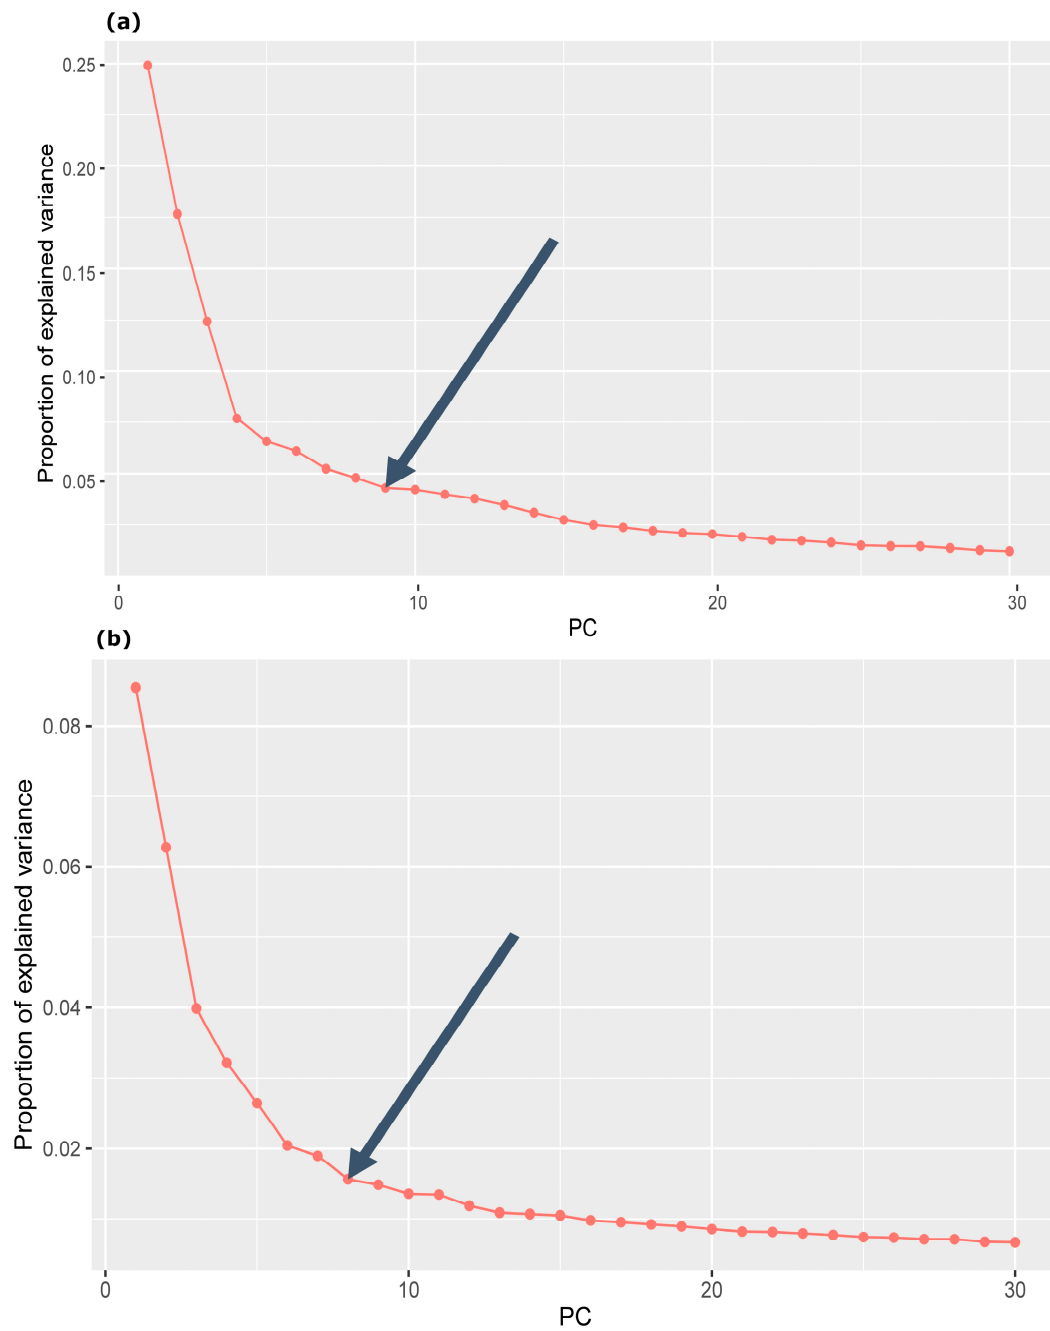

**Figure S1.** Scree plots generated to estimate the appropriate number of ancestral populations; (a) main population (n=921); (b) landraces (n=347). The arrow indicates the point where the curve starts a horizontal trend. The appropriate number of ancestral populations is the point to the left of the point indicated by the arrow.

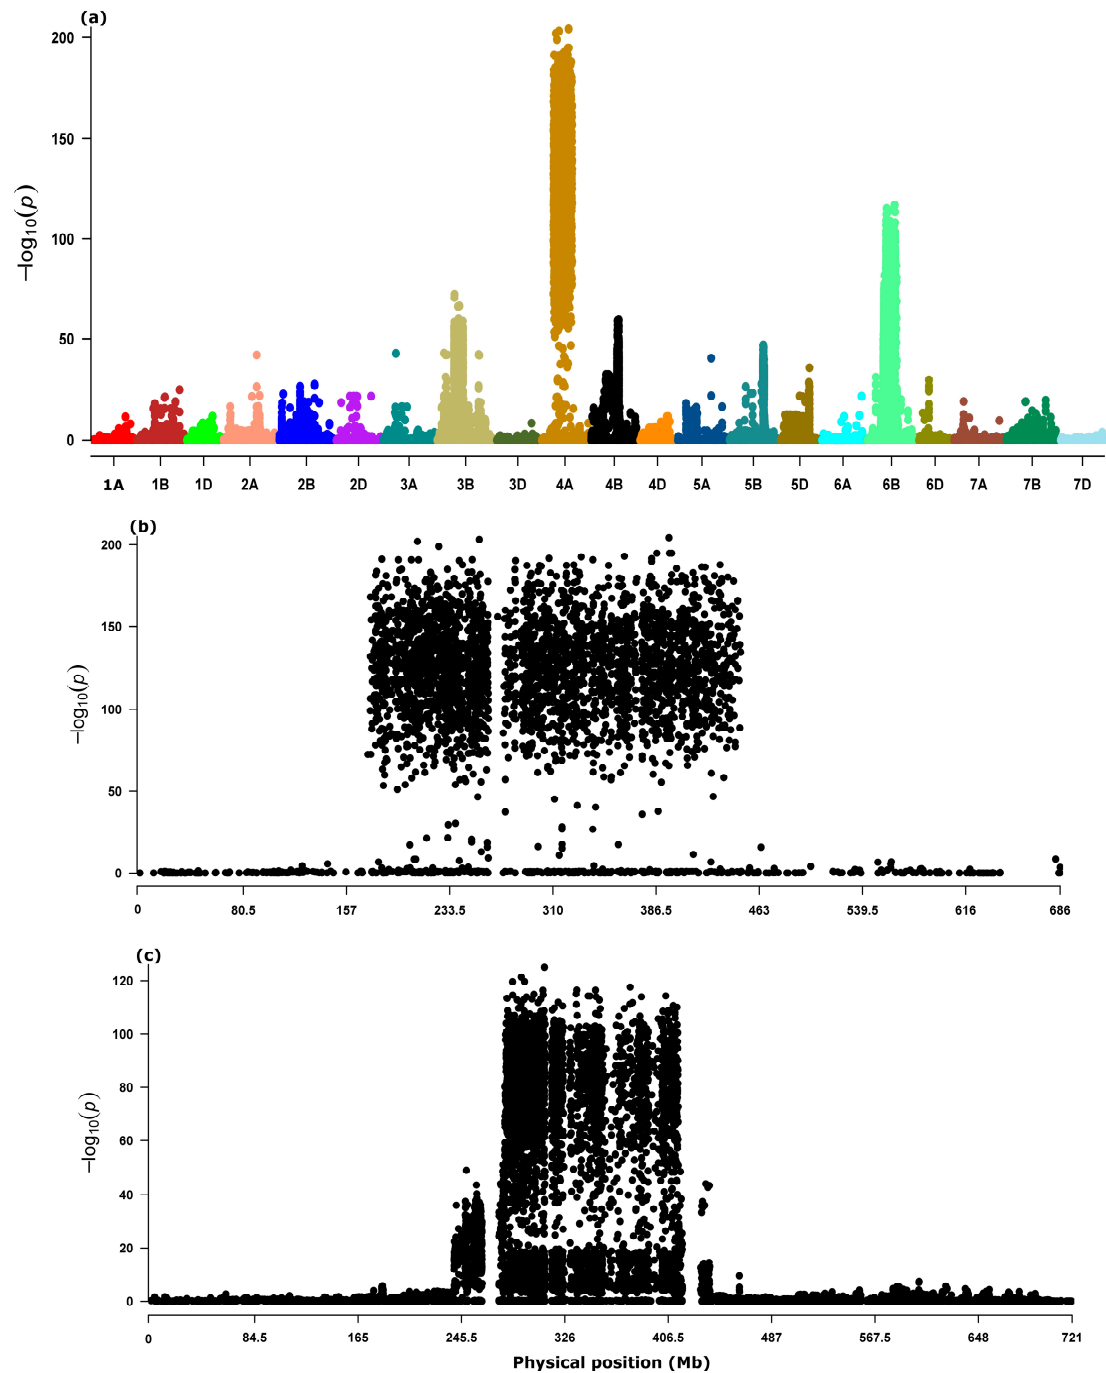

**Figure S2.** Manhattan plots showing genomic regions indicating past hybridization and/or adaptation signatures generated through pc-based genomes scanning of whole genome resequencing genotype data of hexaploid wheats; (a) Manhattan plot showing entire genome; (b) and (c) Manhattans showing the peak regions on chromosome 4A and 6B respectively.

**Table S3.** Haplotypes carried by at least two individuals based on 62 highly differentiated SNPs.

| Hap <sup>1</sup> | Haplotype sequence                                             | #Hap <sup>2</sup> | Ind <sup>3</sup> | Freq <sup>4</sup> | % <sup>5</sup> | Group <sup>6</sup> |
|------------------|----------------------------------------------------------------|-------------------|------------------|-------------------|----------------|--------------------|
| HAP1             | ATCGGGTCTTTATGCGTAGGGTGATGGTAGTCCACAAGTTCAGGTTAGTGCCGACGTTCTCA | 1120              | 560              | 0.608             | 100.0          | G1                 |
| HAP2             | GATAATGTCCCTCATCCGTAACCCCTAACAATGCGCCTGCTCAACCGAGAAGCTTAGCTCTG | 230               | 115              | 0.125             | 100.0          | G2                 |
| HAP3             | GATAATGTCCCTCATCCGTGACCCCTAACAATGCGCCTGCTCAACCGAGAAGCTTAGCTCTG | 47                | 24               | 0.026             | 98.4           | G2                 |
| HAP4             | ATCGGGTCTTTATGCGTAGGGTGATGGTAGTCCACAAGTTCAGGTTAGTGCCGACGTTCTCA | 11                | 6                | 0.006             | 98.4           | G1                 |
| HAP5             | ATCGGGTCTTTATGCGTAGGGTGATGGTAGTCCACAAGTTCAGGTTAGTGCCGACGTTCTCA | 11                | 6                | 0.006             | 98.4           | G1                 |
| HAP6             | ATCGGGTCTTTATGCGTAGGGTGATGGTAGTCCACAAGTTCAGGTTAGTGCCGACGTTCTCA | 9                 | 5                | 0.005             | 98.4           | G1                 |
| HAP7             | ATCGGGTCTTTATGCGTAGGGTGATGGAAGTCCACAAGTTCAGGTTAGTGCCGACGTTCTCA | 9                 | 5                | 0.005             | 98.4           | G1                 |
| HAP8             | ATCGGGTCTTTATGTGTAGGGTGATGGTAGTCCACAAGTTCAGGTTAGTGCCGACGTTCTCA | 8                 | 4                | 0.004             | 98.4           | G1                 |
| HAP9             | ATCGGTTCTTTATGCGTAGGGTGATGGTAGTCCACAAGTTCAGGTTAGTGCCGACGTTCTCA | 5                 | 3                | 0.003             | 98.4           | G1                 |
| HAP10            | AACGGGTCTTTATGCGTAGGGTGATGGTAGTCCACAAGTTCAGGTTAGTGCCGACGTTCTCA | 4                 | 2                | 0.002             | 98.4           | G1                 |
| HAP11            | GATAATGTCCCTCATCCGTGGCCCTAACAATGCGCCTGCTCAACCGAGAAGCTTAGCTCTG  | 4                 | 2                | 0.002             | 96.8           | G2                 |
| HAP12            | GATAATGTCCCTCATCCGTAACCCCTAACAATGCGCCTTCTCAACCGAGAAGCTTAGCTCTG | 4                 | 2                | 0.002             | 98.4           | G2                 |
| HAP13            | ATCAGGTCTTTATGCGTAGGGTGATGGTAGTCCACAAGTTCAGGTTAGTGCCGACGTTCTCA | 4                 | 2                | 0.002             | 98.4           | G1                 |
| HAP14            | ATCGGGTCTTTATGCGTAGGGTGATGGTAGTCCCAAGTTCAGGTTAGTGCCGACGTTCTCA  | 4                 | 2                | 0.002             | 98.4           | G1                 |
| HAP15            | GATAATGTCCCTCATCCGTGACCCCTAACAATGCGCCTGCTCAACCGAGAAGCTTAGCTCTA | 4                 | 2                | 0.002             | 98.4           | G2                 |

<sup>1</sup>Haplotype names; <sup>2</sup>Total number of haplotype detected; <sup>3</sup>The minimum number of individuals carrying the haplotype; <sup>4</sup>Haplotype frequency against the total number of detected haplotypes (n=1842) or individuals carrying the haplotype per the total number of individuals (n=921); <sup>5</sup>Percent sequence similarity to HAP1 or HAP2; <sup>6</sup>Haplotypes falling under G1= Group1 (over 95% similarity with HAP1) or G2= Group2 (over 95% similarity with HAP2).

**Table S4.** High confidence genes within the elevated 4A region.

| GeneID             | Gene2 | gene_start_query | gene_end_query | Description                                                              |
|--------------------|-------|------------------|----------------|--------------------------------------------------------------------------|
| TraesCS4A02G151200 | 1     | 3.03E+08         | 302681173      | GRF1-interacting factor-like protein                                     |
| TraesCS4A02G151300 | 1     | 3.03E+08         | 302721227      | DNA-directed RNA polymerase I subunit rpa49                              |
| TraesCS4A02G151500 | 1     | 3.06E+08         | 306320710      | Nuclear factor Y subunit C                                               |
| TraesCS4A02G151600 | 1     | 3.07E+08         | 307089077      | P-loop containing nucleoside triphosphate hydrolases superfamily protein |
| TraesCS4A02G151700 | 4     | 3.08E+08         | 308058892      | Ycf68                                                                    |
| TraesCS4A02G151800 | 1     | 3.09E+08         | 309090743      | Protein transport protein SEC23                                          |
| TraesCS4A02G151900 | 1     | 3.09E+08         | 309286089      | ATP synthase subunit beta                                                |
| TraesCS4A02G152000 | 1     | 3.09E+08         | 309286830      | ATP synthase epsilon chain                                               |
| TraesCS4A02G152100 | 1     | 3.09E+08         | 309289160      | NAD(P)H-quinone oxidoreductase subunit 3, chloroplastic                  |
| TraesCS4A02G152200 | 1     | 3.09E+08         | 309375435      | NAD(P)H-quinone oxidoreductase subunit K, chloroplastic                  |
| TraesCS4A02G152300 | 1     | 3.09E+08         | 309376016      | NAD(P)H-quinone oxidoreductase subunit J, chloroplastic                  |
| TraesCS4A02G152400 | 1     | 3.09E+08         | 309446750      | ATP synthase subunit c, chloroplastic                                    |
| TraesCS4A02G152500 | 1     | 3.09E+08         | 309448062      | ATP synthase subunit a, chloroplastic                                    |
| TraesCS4A02G152600 | 3     | 3.09E+08         | 309447586      | Cytochrome c-550                                                         |
| TraesCS4A02G152700 | 1     | 3.09E+08         | 309449027      | 30S ribosomal protein S2                                                 |
| TraesCS4A02G152800 | 1     | 3.09E+08         | 309478441      | DNA-directed RNA polymerase subunit beta                                 |
| TraesCS4A02G152900 | 1     | 3.09E+08         | 309478882      | myo-inositol oxygenase 5                                                 |
| TraesCS4A02G153000 | 2     | 3.09E+08         | 309489583      | Photosystem II CP43 reaction center protein                              |
| TraesCS4A02G153100 | 2     | 3.1E+08          | 309504713      | Photosystem II protein D2                                                |
| TraesCS4A02G153200 | 2     | 3.1E+08          | 309506404      | Photosystem II reaction center protein I                                 |
| TraesCS4A02G153300 | 5     | 3.1E+08          | 309511422      | Maturase K                                                               |
| TraesCS4A02G153400 | 2     | 3.1E+08          | 309513620      | Photosystem II protein D1                                                |
| TraesCS4A02G153500 | 1     | 3.1E+08          | 309513944      | 30S ribosomal protein S19, chloroplastic                                 |
| TraesCS4A02G153600 | 1     | 3.1E+08          | 309514772      | 50S ribosomal protein L2                                                 |
| TraesCS4A02G153700 | 1     | 3.1E+08          | 309515445      | Protein kinase superfamily protein                                       |
| TraesCS4A02G153800 | 1     | 3.1E+08          | 309515780      | Undecaprenyl-phosphate 4-deoxy-4-formamido-L-arabinose transferase       |
| TraesCS4A02G153900 | 1     | 3.1E+08          | 309516511      | S-adenosyl-L-methionine-dependent methyltransferases superfamily protein |
| TraesCS4A02G154000 | 1     | 3.1E+08          | 310241368      | H/ACA ribonucleoprotein complex subunit 1-like protein 1                 |
| TraesCS4A02G154100 | 1     | 3.1E+08          | 310245711      | Pumilio                                                                  |

| GeneID             | Gene2 | gene_start_query | gene_end_query | Description                                              |
|--------------------|-------|------------------|----------------|----------------------------------------------------------|
| TraesCS4A02G154200 | 2     | 3.11E+08         | 310729855      | Photosystem II reaction center protein I                 |
| TraesCS4A02G154300 | 2     | 3.11E+08         | 310730441      | Photosystem II reaction center protein K                 |
| TraesCS4A02G154400 | 5     | 3.11E+08         | 310735011      | Maturase K                                               |
| TraesCS4A02G154500 | 1     | 3.11E+08         | 310737447      | 30S ribosomal protein S19, chloroplastic                 |
| TraesCS4A02G154600 | 1     | 3.11E+08         | 310738242      | UDP-N-acetylglucosamine 1-carboxyvinyltransferase        |
| TraesCS4A02G154700 | 1     | 3.11E+08         | 310739225      | 50S ribosomal protein L2                                 |
| TraesCS4A02G154800 | 1     | 3.11E+08         | 310739247      | Ribosomal protein L2                                     |
| TraesCS4A02G154900 | 4     | 3.11E+08         | 310739978      | Protein Ycf2                                             |
| TraesCS4A02G155000 | 1     | 3.11E+08         | 310742452      | 4-hydroxy-2-oxovalerate aldolase 2                       |
| TraesCS4A02G155100 | 4     | 3.11E+08         | 310748961      | Ycf68                                                    |
| TraesCS4A02G155200 | 1     | 3.11E+08         | 310750605      | translocator assembly/maintenance protein                |
| TraesCS4A02G155300 | 1     | 3.11E+08         | 310756216      | 6,7-dimethyl-8-ribityllumazine synthase                  |
| TraesCS4A02G155400 | 1     | 3.11E+08         | 310762503      | NADH-quinone oxidoreductase subunit H 1                  |
| TraesCS4A02G155500 | 1     | 3.11E+08         | 310763661      | NAD(P)H-quinone oxidoreductase subunit 6, chloroplastic  |
| TraesCS4A02G155600 | 1     | 3.11E+08         | 310766849      | NAD(P)H-quinone oxidoreductase chain 4                   |
| TraesCS4A02G155700 | 3     | 3.11E+08         | 310768165      | Cytochrome c biogenesis protein CcsA                     |
| TraesCS4A02G155800 | 1     | 3.11E+08         | 310776835      | 30S ribosomal protein S15                                |
| TraesCS4A02G155900 | 1     | 3.11E+08         | 310782832      | Sec14p-like phosphatidylinositol transfer family protein |
| TraesCS4A02G156000 | 4     | 3.11E+08         | 310784484      | 2-keto-3-deoxy-L-rhamnonate aldolase                     |
| TraesCS4A02G156100 | 1     | 3.11E+08         | 310789914      | 30S ribosomal protein S7                                 |
| TraesCS4A02G156200 | 1     | 3.11E+08         | 310791575      | NAD(P)H-quinone oxidoreductase subunit 2, chloroplastic  |
| TraesCS4A02G156300 | 1     | 3.12E+08         | 311664820      | ABC transporter ATP-binding protein                      |
| TraesCS4A02G156500 | 1     | 3.13E+08         | 312708877      | Vacuolar cation/proton exchanger, putative               |
| TraesCS4A02G156600 | 1     | 3.13E+08         | 312883445      | RING zinc finger-containing protein                      |
| TraesCS4A02G156700 | 1     | 3.14E+08         | 313639691      | Villin                                                   |
| TraesCS4A02G156800 | 1     | 3.14E+08         | 313752415      | Anaphase spindle elongation protein 1                    |
| TraesCS4A02G156900 | 1     | 3.15E+08         | 314697897      | Chromophore lyase CpcT/CpeT                              |
| TraesCS4A02G157000 | 1     | 3.17E+08         | 317090756      | SAP domain-containing protein                            |
| TraesCS4A02G157100 | 1     | 3.18E+08         | 318045161      | RNA polymerase sigma factor                              |
| TraesCS4A02G157200 | 1     | 3.2E+08          | 319844862      | GTPase obg                                               |

| GeneID             | Gene2 | gene_start_query | gene_end_query | Description                                                  |
|--------------------|-------|------------------|----------------|--------------------------------------------------------------|
| TraesCS4A02G157300 | 1     | 3.2E+08          | 320273940      | RNA-binding protein                                          |
| TraesCS4A02G157400 | 1     | 3.21E+08         | 321184345      | Cellulose synthase family protein                            |
| TraesCS4A02G157500 | 1     | 3.21E+08         | 321195641      | Ubiquitin-like-specific protease ESD4                        |
| TraesCS4A02G157600 | 1     | 3.22E+08         | 321905801      | Transmembrane protein 184C                                   |
| TraesCS4A02G157700 | 1     | 3.23E+08         | 323051613      | splicing factor-like protein                                 |
| TraesCS4A02G157800 | 1     | 3.24E+08         | 323785847      | PQ-loop repeat family protein / transmembrane family protein |
| TraesCS4A02G157900 | 1     | 3.24E+08         | 323789209      | Oxidoreductase/ transition metal ion binding protein         |
| TraesCS4A02G158000 | 1     | 3.24E+08         | 323854300      | Peter Pan-like protein                                       |
| TraesCS4A02G158100 | 1     | 3.25E+08         | 324708729      | Auxin-repressed/dormancy-associated protein                  |
| TraesCS4A02G158200 | 1     | 3.25E+08         | 325196452      | ATP-dependent RNA helicase, putative                         |
| TraesCS4A02G158300 | 1     | 3.26E+08         | 326137945      | TRAF type zinc finger domain containing 1                    |
| TraesCS4A02G158400 | 1     | 3.27E+08         | 327261042      | tRNA-2-methylthio-N(6)-dimethylallyl-adenosine synthase      |
| TraesCS4A02G158600 | 1     | 3.28E+08         | 327747380      | B3 domain-containing protein                                 |
| TraesCS4A02G158700 | 1     | 3.28E+08         | 327757720      | Sister-chromatid cohesion protein 3                          |
| TraesCS4A02G158800 | 1     | 3.29E+08         | 329172009      | GRF zinc finger family protein, expressed                    |
| TraesCS4A02G158900 | 1     | 3.29E+08         | 329188700      | ATP synthase epsilon chain                                   |
| TraesCS4A02G159000 | 1     | 3.3E+08          | 330103702      | myosin-binding protein (Protein of unknown function, DUF593) |
| TraesCS4A02G159100 | 1     | 3.32E+08         | 331632278      | Thiol:disulfide interchange protein TxIA                     |
| TraesCS4A02G159200 | 1     | 3.33E+08         | 332659130      | Pimeloyl-[acyl-carrier protein] methyl ester esterase        |
| TraesCS4A02G159300 | 1     | 3.34E+08         | 334268654      | T-complex protein 1 subunit zeta                             |
| TraesCS4A02G159400 | 1     | 3.39E+08         | 338749134      | Agnet domain containing protein                              |
| TraesCS4A02G159500 | 1     | 3.4E+08          | 340508791      | Transmembrane protein 87A                                    |
| TraesCS4A02G159600 | 1     | 3.41E+08         | 340511300      | Isopentenyl-diphosphate delta-isomerase                      |
| TraesCS4A02G159700 | 1     | 3.42E+08         | 341782585      | Cystathionine gamma-synthase                                 |
| TraesCS4A02G159800 | 1     | 3.42E+08         | 341994093      | myo-inositol oxygenase 5                                     |
| TraesCS4A02G159900 | 1     | 3.42E+08         | 342464186      | O-fucosyltransferase family protein                          |
| TraesCS4A02G160000 | 1     | 3.44E+08         | 343803198      | Tubulin alpha-6 chain                                        |
| TraesCS4A02G160100 | 1     | 3.44E+08         | 343908352      | Plant calmodulin-binding protein-like protein                |
| TraesCS4A02G160200 | 1     | 3.44E+08         | 343937295      | Short chain dehydrogenase/reductase family 42E member 1      |
| TraesCS4A02G160300 | 1     | 3.44E+08         | 343936672      | tRNA pseudouridine synthase A                                |

| GeneID             | Gene2 | gene_start_query | gene_end_query | Description                                                                    |
|--------------------|-------|------------------|----------------|--------------------------------------------------------------------------------|
| TraesCS4A02G160400 | 1     | 3.44E+08         | 344035918      | Basic leucine zipper and W2 domain-containing protein 2                        |
| TraesCS4A02G160500 | 1     | 3.45E+08         | 344964824      | Heavy metal transport/detoxification superfamily protein                       |
| TraesCS4A02G160600 | 1     | 3.46E+08         | 345844921      | Phosphatidate phosphatase, Lipin                                               |
| TraesCS4A02G160700 | 1     | 3.46E+08         | 346064702      | Transducin/WD-like repeat-protein                                              |
| TraesCS4A02G160800 | 1     | 3.47E+08         | 346688223      | 2,3-bisphosphoglycerate-dependent phosphoglycerate mutase                      |
| TraesCS4A02G160900 | 1     | 3.47E+08         | 347402111      | Chaperone protein DnaJ                                                         |
| TraesCS4A02G161000 | 1     | 3.49E+08         | 348504742      | Acetyl-coenzyme A carboxylase carboxyl transferase subunit beta, chloroplastic |
| TraesCS4A02G161100 | 1     | 3.49E+08         | 349310580      | RING/U-box superfamily protein                                                 |
| TraesCS4A02G161200 | 1     | 3.5E+08          | 349887485      | Acetyl-coenzyme A carboxylase carboxyl transferase subunit beta, chloroplastic |
| TraesCS4A02G161300 | 1     | 3.5E+08          | 350173482      | ATP synthase subunit 9, mitochondrial                                          |
| TraesCS4A02G161400 | 1     | 3.5E+08          | 350238804      | XH/XS domain-containing protein                                                |
| TraesCS4A02G161500 | 1     | 3.5E+08          | 350239272      | RmlC-like cupins superfamily protein                                           |
| TraesCS4A02G161600 | 2     | 3.5E+08          | 350244759      | Cytochrome b559 subunit alpha                                                  |
| TraesCS4A02G161700 | 1     | 3.52E+08         | 351899145      | Speckle-type POZ protein-like protein B                                        |
| TraesCS4A02G161900 | 1     | 3.52E+08         | 352276765      | S-acyltransferase                                                              |
| TraesCS4A02G162000 | 1     | 3.52E+08         | 352513698      | E3 ubiquitin-protein ligase                                                    |
| TraesCS4A02G162100 | 1     | 3.53E+08         | 353091693      | Stearoyl-[acyl-carrier-protein] 9-desaturase, chloroplastic                    |
| TraesCS4A02G162200 | 1     | 3.54E+08         | 353877943      | Dentin sialophosphoprotein-related, putative isoform 1                         |
| TraesCS4A02G162300 | 1     | 3.57E+08         | 356556917      | SNARE                                                                          |
| TraesCS4A02G162400 | 1     | 3.57E+08         | 357262996      | ATP-dependent RNA helicase                                                     |
| TraesCS4A02G162500 | 1     | 3.58E+08         | 357694116      | WRKY transcription factor                                                      |
| TraesCS4A02G162600 | 1     | 3.59E+08         | 358840615      | DNA-directed RNA polymerase subunit beta                                       |
| TraesCS4A02G162700 | 1     | 3.59E+08         | 358873662      | 1-phosphatidylinositol-3-phosphate 5-kinase                                    |
| TraesCS4A02G162800 | 1     | 3.6E+08          | 359640296      | Ubiquitin system component Cue protein                                         |
| TraesCS4A02G163000 | 1     | 3.62E+08         | 362113814      | Ubiquitin carboxyl-terminal hydrolase family protein, expressed                |
| TraesCS4A02G163100 | 1     | 3.63E+08         | 363122351      | Transcription initiation factor TFIID subunit 4b                               |
| TraesCS4A02G163200 | 1     | 3.64E+08         | 363713421      | S-adenosyl-L-methionine-dependent methyltransferases superfamily protein       |
| TraesCS4A02G163300 | 1     | 3.64E+08         | 363748257      | Transcription factor                                                           |
| TraesCS4A02G163400 | 1     | 3.66E+08         | 365658289      | Rho GTPase-activating protein                                                  |
| TraesCS4A02G163500 | 1     | 3.69E+08         | 368571931      | Mannose-6-phosphate isomerase                                                  |

| GeneID             | Gene2 | gene_start_query | gene_end_query | Description                                                      |
|--------------------|-------|------------------|----------------|------------------------------------------------------------------|
| TraesCS4A02G163600 | 1     | 3.7E+08          | 369543816      | WD repeat-containing protein 1                                   |
| TraesCS4A02G163700 | 1     | 3.72E+08         | 371796858      | Inositol-1-monophosphatase family protein                        |
| TraesCS4A02G163800 | 1     | 3.74E+08         | 373809076      | C2 calcium/lipid-binding and GRAM domain containing protein      |
| TraesCS4A02G163900 | 1     | 3.75E+08         | 374659814      | ATP-binding cassette sub-family G member 5                       |
| TraesCS4A02G164000 | 1     | 3.76E+08         | 375733434      | Flavin-binding kelch domain F box protein                        |
| TraesCS4A02G164100 | 1     | 3.77E+08         | 376728979      | RING/FYVE/PHD zinc finger superfamily protein                    |
| TraesCS4A02G164200 | 1     | 3.78E+08         | 377596428      | GRF zinc finger family protein                                   |
| TraesCS4A02G164300 | 1     | 3.79E+08         | 379045201      | Glycosyltransferase                                              |
| TraesCS4A02G164400 | 1     | 3.79E+08         | 379469407      | 3-ketoacyl-CoA synthase                                          |
| TraesCS4A02G164500 | 1     | 3.8E+08          | 380148176      | phosphoglycolate phosphatase                                     |
| TraesCS4A02G164600 | 1     | 3.81E+08         | 381228055      | Vacuolar protein sorting-associated                              |
| TraesCS4A02G164700 | 1     | 3.83E+08         | 383180995      | Formin-like protein                                              |
| TraesCS4A02G164800 | 1     | 3.84E+08         | 383547554      | Protein SUPPRESSOR OF GENE SILENCING 3                           |
| TraesCS4A02G164900 | 1     | 3.84E+08         | 384398821      | T-complex protein 1 subunit theta                                |
| TraesCS4A02G165000 | 1     | 3.86E+08         | 385774186      | Splicing factor u2af large subunit, putative                     |
| TraesCS4A02G165100 | 1     | 3.86E+08         | 385781526      | Adenylyl-sulfate kinase                                          |
| TraesCS4A02G165200 | 1     | 3.87E+08         | 387130365      | ATP-dependent RNA helicase                                       |
| TraesCS4A02G165300 | 1     | 3.89E+08         | 389251601      | E3 ubiquitin-protein ligase family                               |
| TraesCS4A02G165400 | 1     | 3.9E+08          | 389991790      | Phosphatidylinositol-4-phosphate 5-kinase 4, putative, expressed |
| TraesCS4A02G165500 | 1     | 3.91E+08         | 390911142      | Protein ENHANCED DISEASE RESISTANCE 2-like                       |
| TraesCS4A02G165600 | 1     | 3.95E+08         | 395034817      | 3-oxoacyl-[acyl-carrier-protein] synthase                        |
| TraesCS4A02G165700 | 1     | 3.97E+08         | 396754973      | stearoyl-[acyl-carrier-protein] 9-desaturase, chloroplastic      |
| TraesCS4A02G165800 | 1     | 3.97E+08         | 396757269      | ADP-L-glycero-D-manno-heptose-6-epimerase                        |
| TraesCS4A02G165900 | 1     | 3.98E+08         | 397611165      | Carnitiny-CoA dehydratase                                        |
| TraesCS4A02G166000 | 1     | 3.98E+08         | 398499003      | DNA topoisomerase                                                |
| TraesCS4A02G166100 | 1     | 3.99E+08         | 398506190      | Pathogenesis-related thaumatin-like protein                      |
| TraesCS4A02G166200 | 1     | 4.01E+08         | 400760929      | Beta-adaptin-like protein                                        |
| TraesCS4A02G166300 | 1     | 4.01E+08         | 400851800      | DNA helicase ROCK-N-ROLLERS                                      |
| TraesCS4A02G166400 | 1     | 4.01E+08         | 401303756      | Transient receptor potential cation channel subfamily V member 4 |
| TraesCS4A02G166500 | 1     | 4.03E+08         | 403387985      | Eukaryotic translation initiation factor 3 subunit I             |



---

| GeneID             | Gene2 | gene_start_query | gene_end_query | Description                                       |
|--------------------|-------|------------------|----------------|---------------------------------------------------|
| TraesCS4A02G166600 | 1     | 4.06E+08         | 405579589      | Zinc finger, PHD-finger                           |
| TraesCS4A02G166700 | 1     | 4.07E+08         | 407465049      | Senescence-associated protein                     |
| TraesCS4A02G166800 | 1     | 4.08E+08         | 407611328      | Clustered mitochondria protein homolog            |
| TraesCS4A02G166900 | 1     | 4.09E+08         | 409037882      | Alpha-1,4-glucan-protein synthase [UDP-forming] 1 |
| TraesCS4A02G167000 | 1     | 4.1E+08          | 410395633      | 30S ribosomal protein S5                          |

**Table S5.** Population pairwise differentiation (PhiPT) of cultivated wheat types and wild relatives.

| Pop     | TaesClu | TaesCul | TaesInd | TaesLan | TaesMac | TaesSpe | TaesTib | TaesYun | Tisplsp | TkarGeo | TmonDom | TmonWil | TpetXin | TturDom | TturDur | TturKho | TturPer | TturPol | TturRiv | TturWil | TuraUra | TvavVav |
|---------|---------|---------|---------|---------|---------|---------|---------|---------|---------|---------|---------|---------|---------|---------|---------|---------|---------|---------|---------|---------|---------|---------|
| TaesClu |         | 0.004   | 0.135   | 0.215   | 0.119   | 0.010   | 0.358   | 0.165   | 0.149   | 0.267   | 0.000   | 0.000   | 0.284   | 0.012   | 0.019   | 0.084   | 0.088   | 0.080   | 0.066   | 0.014   | 0.000   | 0.176   |
| TaesCul | 0.413   |         | 0.170   | 0.000   | 0.000   | 0.000   | 0.163   | 0.021   | 0.217   | 0.108   | 0.000   | 0.000   | 0.136   | 0.420   | 0.348   | 0.287   | 0.270   | 0.288   | 0.326   | 0.439   | 0.000   | 0.161   |
| TaesInd | 0.208   | 0.000   |         | 0.120   | 0.007   | 0.000   | 0.174   | 0.353   | 0.447   | 0.304   | 0.000   | 0.000   | 0.434   | 0.493   | 0.387   | 0.489   | 0.478   | 0.493   | 0.481   | 0.466   | 0.000   | 0.499   |
| TaesLan | 0.000   | 0.206   | 0.160   |         | 0.008   | 0.000   | 0.127   | 0.231   | 0.038   | 0.265   | 0.000   | 0.000   | 0.221   | 0.000   | 0.006   | 0.015   | 0.022   | 0.011   | 0.007   | 0.000   | 0.000   | 0.132   |
| TaesMac | 0.353   | 0.883   | 0.849   | 0.335   |         | 0.438   | 0.008   | 0.035   | 0.002   | 0.018   | 0.000   | 0.000   | 0.002   | 0.000   | 0.000   | 0.000   | 0.001   | 0.000   | 0.001   | 0.000   | 0.000   | 0.008   |
| TaesSpe | 0.390   | 0.826   | 0.763   | 0.344   | 0.000   |         | 0.000   | 0.001   | 0.000   | 0.003   | 0.000   | 0.000   | 0.001   | 0.000   | 0.000   | 0.000   | 0.000   | 0.000   | 0.000   | 0.000   | 0.000   | 0.000   |
| TaesTib | 0.191   | 0.000   | 0.004   | 0.156   | 0.835   | 0.755   |         | 0.511   | 0.526   | 0.553   | 0.000   | 0.000   | 0.482   | 0.423   | 0.033   | 0.471   | 0.493   | 0.470   | 0.483   | 0.473   | 0.000   | 0.453   |
| TaesYun | 0.000   | 0.127   | 0.003   | 0.000   | 0.597   | 0.591   | 0.000   |         | 0.412   | 0.374   | 0.000   | 0.000   | 0.428   | 0.130   | 0.096   | 0.328   | 0.344   | 0.313   | 0.288   | 0.144   | 0.000   | 0.475   |
| Tisplsp | 0.240   | 0.010   | 0.000   | 0.173   | 0.841   | 0.765   | 0.000   | 0.030   |         | 0.606   | 0.000   | 0.000   | 0.482   | 0.005   | 0.000   | 0.065   | 0.006   | 0.051   | 0.047   | 0.005   | 0.000   | 0.463   |
| TkarGeo | 0.089   | 0.000   | 0.015   | 0.110   | 0.815   | 0.738   | 0.000   | 0.000   | 0.000   |         | 0.000   | 0.001   | 0.397   | 0.503   | 0.279   | 0.549   | 0.533   | 0.541   | 0.546   | 0.519   | 0.000   | 0.528   |
| TmonDom | 0.494   | 0.180   | 0.227   | 0.239   | 0.908   | 0.844   | 0.233   | 0.267   | 0.229   | 0.228   |         | 0.000   | 0.000   | 0.000   | 0.000   | 0.000   | 0.000   | 0.000   | 0.000   | 0.000   | 0.000   | 0.000   |
| TmonWil | 0.508   | 0.169   | 0.209   | 0.243   | 0.909   | 0.849   | 0.218   | 0.273   | 0.217   | 0.208   | 0.028   |         | 0.000   | 0.000   | 0.000   | 0.000   | 0.000   | 0.000   | 0.000   | 0.000   | 0.000   | 0.000   |
| TpetXin | 0.154   | 0.000   | 0.000   | 0.140   | 0.831   | 0.750   | 0.000   | 0.000   | 0.000   | 0.005   | 0.231   | 0.212   |         | 0.495   | 0.226   | 0.492   | 0.496   | 0.501   | 0.494   | 0.490   | 0.000   | 0.224   |
| TturDom | 0.487   | 0.000   | 0.000   | 0.238   | 0.902   | 0.847   | 0.003   | 0.203   | 0.022   | 0.000   | 0.208   | 0.197   | 0.000   |         | 0.447   | 0.067   | 0.481   | 0.259   | 0.030   | 0.041   | 0.000   | 0.495   |
| TturDur | 0.398   | 0.000   | 0.005   | 0.211   | 0.898   | 0.816   | 0.038   | 0.154   | 0.038   | 0.035   | 0.239   | 0.221   | 0.023   | 0.000   |         | 0.002   | 0.014   | 0.005   | 0.001   | 0.470   | 0.000   | 0.182   |
| TturKho | 0.307   | 0.000   | 0.000   | 0.191   | 0.861   | 0.785   | 0.000   | 0.076   | 0.005   | 0.000   | 0.216   | 0.203   | 0.000   | 0.007   | 0.014   |         | 0.496   | 0.493   | 0.051   | 0.067   | 0.000   | 0.462   |
| TturPer | 0.298   | 0.000   | 0.000   | 0.188   | 0.863   | 0.783   | 0.000   | 0.071   | 0.008   | 0.000   | 0.222   | 0.207   | 0.000   | 0.000   | 0.013   | 0.000   |         | 0.491   | 0.493   | 0.478   | 0.000   | 0.487   |
| TturPol | 0.315   | 0.000   | 0.000   | 0.193   | 0.867   | 0.789   | 0.000   | 0.085   | 0.006   | 0.000   | 0.218   | 0.204   | 0.000   | 0.003   | 0.011   | 0.000   | 0.000   |         | 0.347   | 0.330   | 0.000   | 0.488   |
| TturRiv | 0.338   | 0.000   | 0.000   | 0.199   | 0.868   | 0.795   | 0.000   | 0.097   | 0.006   | 0.000   | 0.211   | 0.200   | 0.000   | 0.007   | 0.009   | 0.003   | 0.000   | 0.001   |         | 0.044   | 0.000   | 0.466   |
| TturWil | 0.477   | 0.000   | 0.000   | 0.235   | 0.899   | 0.844   | 0.000   | 0.194   | 0.019   | 0.000   | 0.205   | 0.192   | 0.000   | 0.001   | 0.000   | 0.006   | 0.000   | 0.001   | 0.005   |         | 0.000   | 0.470   |
| TuraUra | 0.531   | 0.251   | 0.336   | 0.247   | 0.919   | 0.854   | 0.337   | 0.323   | 0.322   | 0.350   | 0.241   | 0.225   | 0.342   | 0.285   | 0.335   | 0.306   | 0.315   | 0.312   | 0.297   | 0.280   |         | 0.000   |
| TvavVav | 0.201   | 0.000   | 0.000   | 0.158   | 0.844   | 0.760   | 0.000   | 0.000   | 0.000   | 0.001   | 0.232   | 0.212   | 0.005   | 0.000   | 0.018   | 0.000   | 0.000   | 0.000   | 0.000   | 0.000   | 0.337   |         |

Below diagonal are PhiPT values and above diagonal values indicate Pvalues.

**Species:** Taes=*T.aestivum*, Tisp=*T. ispahanicum*, Tkar=*T. karamyshevii*, Tmon=*T.monococcum*, Tpet=*T. petropavlovskyi*, Ttur=*T. turgidum*, Tura=*T.urartu*, Tvav=*T.vavilovii*

**Wheat types:** Clu=Club, Cul=caltivars, Dom=Domesticated, Dur=Durum, Geo=Georgian, Ind=Indian dwarf, isp= Ispahanicum, Kho= Khorasan, Lan=Landraces(bread wheat), Mac=Macha, Per=Persian, Pol=Polish, Riv=Rivet, Spe=Spelt, Tib=Tibetan Semi-wild, Ura=Urartu, Vav=Vavilovii, Wil-Wild, Xin= Xinjiang, Yun=Yunan

**Table S6.** Population pairwise differentiation based on maximum likelihood statistical significance (G-test) of cultivated wheat types and wild relatives.

| Pop     | TaesClu | TaesCul | TaesInd | TaesLan | TaesMac | TaesSpe | TaesTib | TaesYun | Tisplsp | TkarGeo | TmonDom | TmonWil | TpetXin | TturDom | TturDur | TturKho | TturPer | TturPol | TturRiv | TturWil | TuraUra | TvavVav |
|---------|---------|---------|---------|---------|---------|---------|---------|---------|---------|---------|---------|---------|---------|---------|---------|---------|---------|---------|---------|---------|---------|---------|
| TaesClu |         | ***     | ***     | 1       | ***     | ***     | ***     | 1       | ***     | ***     | ***     | ***     | ***     | ***     | ***     | ***     | ***     | ***     | ***     | ***     | ***     | ***     |
| TaesCul | 50227   |         | 1       | ***     | ***     | ***     | 1       | ***     | 1       | 1       | 1       | ***     | 1       | ***     | 1       | 1       | 1       | 1       | 1       | ***     | ***     | 1.0     |
| TaesInd | 23509   | 103     |         | ***     | ***     | ***     | 1       | 1       | 1       | 0.4     | ***     | ***     | 1       | 1       | 1       | 1       | 0.9     | 0.8     | 1       | 1       | ***     | 1.0     |
| TaesLan | 419     | 13089   | 47175   |         | ***     | ***     | ***     | ***     | ***     | ***     | ***     | ***     | ***     | ***     | ***     | ***     | ***     | ***     | ***     | ***     | ***     | ***     |
| TaesMac | 41577   | 131036  | 108836  | 79278   |         | 1       | ***     | ***     | ***     | ***     | ***     | ***     | ***     | ***     | ***     | ***     | ***     | ***     | ***     | ***     | ***     | ***     |
| TaesSpe | 80028   | 131224  | 130935  | 130786  | 3159    |         | ***     | ***     | ***     | ***     | ***     | ***     | ***     | ***     | ***     | ***     | ***     | ***     | ***     | ***     | ***     | ***     |
| TaesTib | 23484   | 103     | 0       | 47145   | 108781  | 130897  |         | 1       | 1       | 1       | ***     | ***     | 1       | 1       | 0.9     | 1       | 0.8     | 0.7     | 1       | 1       | ***     | 1       |
| TaesYun | 4599    | 19429   | 7127    | 12182   | 67211   | 117426  | 7115    |         | ***     | 1       | ***     | ***     | 1       | ***     | ***     | ***     | ***     | ***     | ***     | ***     | ***     | 1       |
| Tisplsp | 37879   | 4223    | 3       | 65187   | 126651  | 131177  | 17      | 17540   |         | 1       | ***     | ***     | 1       | 1       | 0.7     | 1       | 0.9     | 0.7     | 1       | 1       | ***     | 1       |
| TkarGeo | 20096   | 14      | 6       | 28568   | 83738   | 120118  | 6       | 6590    | 9       |         | ***     | ***     | 0.3     | 1       | 1       | 1       | 0.6     | 0.5     | 1       | 1       | ***     | 0.5     |
| TmonDom | 74509   | 9440    | 2422    | 131187  | 128837  | 128915  | 2450    | 36691   | 2515    | 2415    |         | ***     | ***     | ***     | ***     | ***     | ***     | ***     | ***     | ***     | ***     | ***     |
| TmonWil | 78057   | 16615   | 2245    | 131207  | 129038  | 129088  | 2275    | 38247   | 2386    | 2242    | 488     |         | ***     | ***     | ***     | ***     | ***     | ***     | ***     | ***     | ***     | ***     |
| TpetXin | 22945   | 88      | 0       | 36496   | 99602   | 129439  | 0       | 7038    | 1       | 5       | 2418    | 2239    |         | 1       | 1       | 1       | 1       | 0.9     | 1       | 1       | ***     | 0.8     |
| TturDom | 80063   | 15558   | 4       | 131221  | 131210  | 131224  | 35      | 38026   | 92      | 15      | 2518    | 2524    | 0       |         | 1       | 1       | 1       | 1       | 1       | 1       | ***     | 1.0     |
| TturDur | 54589   | 6195    | 10      | 121333  | 130965  | 131214  | 27      | 25610   | 68      | 10      | 2479    | 2375    | 7       | 61      |         | 0.7     | 0.8     | 0.6     | 1       | 1       | ***     | 0.9     |
| TturKho | 47108   | 5411    | 10      | 92375   | 130278  | 131207  | 27      | 21972   | 56      | 15      | 2496    | 2375    | 7       | 89      | 53      |         | 1       | 1       | 1       | 1       | ***     | 1.0     |
| TturPer | 44338   | 5031    | 6       | 83393   | 129642  | 131204  | 23      | 20656   | 51      | 12      | 2457    | 2333    | 4       | 40      | 24      | 21      |         | 0       | 1       | 1       | ***     | 0.7     |
| TturPol | 47161   | 5427    | 8       | 92420   | 130216  | 131208  | 22      | 22019   | 57      | 13      | 2464    | 2345    | 5       | 45      | 22      | 16      | 20      |         | 1       | 1       | ***     | 0.6     |
| TturRiv | 52173   | 5962    | 17.0    | 111852  | 130873  | 131213  | 37      | 24420   | 73      | 10      | 2520    | 2407    | 13      | 99      | 63      | 55      | 32      | 35      |         | 0.9     | ***     | 1.0     |
| TturWil | 78805   | 15146   | 4.7     | 131215  | 131215  | 131224  | 35      | 37416   | 88      | 14      | 2535    | 2527    | 1       | 135     | 74      | 98      | 51      | 57      | 121     |         | ***     | 1.0     |
| TuraUra | 77480   | 17307   | 3345    | 131198  | 127962  | 128062  | 3374    | 38608   | 3447    | 3350    | 2488    | 2437    | 3340    | 3472    | 3415    | 3432    | 3388    | 3397    | 3450    | 3488    |         | ***     |
| TvavVav | 23500   | 107     | 2       | 47168   | 109004  | 130910  | 2       | 7123    | 7       | 8       | 2422    | 2251    | 2       | 8       | 15      | 14      | 10      | 13      | 17      | 13      | 3349    |         |

Below diagonal are Chi square values and above diagonal values indicate significance, \*\*\*indicates strongly significant, and other numeric values indicate Pvalues.

**Species:** Taes=*T.aestivum*, Tisp=*T. ispahanicum*, Tkar=*T. karamyshevii*, Tmon=*T.monococcum*, Tpet=*T. petropavlovskyi*, Ttur=*T. turgidum*, Tura=*T.urartu*, Tvav=*T.vavilovii*

**Wheat types:** Clu=Club, Cul=caltivars, Dom=Domesticated, Dur=Durum, Geo=Georgian, Ind=Indian dwarf, isp= Ispahanicum, Kho= Khorasan, Lan=Landraces(bread wheat),Mac=Macha, Per=Persian, Pol=Polish, Riv=Rivet, Spe=Spelt, Tib=Tibetan Semi-wild, Ura=Ura, Vav=Vavilovii, Wil-Wild, Xin=Xinjiang, Yun=Yunan

**Table S7.** Ancestral coefficients (Q-matrix).

| Accession       | Q1       | Q2       | Q3       | Q4       | Q5       |
|-----------------|----------|----------|----------|----------|----------|
| Taes_Clu_TW001  | 0.995507 | 0.004193 | 1.00E-04 | 1.00E-04 | 1.00E-04 |
| Taes_Clu_TW002  | 0.973649 | 1.00E-04 | 1.00E-04 | 1.00E-04 | 0.026052 |
| Taes_Clu_TW003  | 1.00E-04 | 1.00E-04 | 0.956833 | 0.042867 | 1.00E-04 |
| Taes_Clu_TW004  | 1.00E-04 | 0.001501 | 0.960286 | 0.038013 | 1.00E-04 |
| Taes_Clu_TW005  | 0.983518 | 0.013907 | 1.00E-04 | 1.00E-04 | 0.002375 |
| Taes_Cul_AMN    | 0.961704 | 0.037996 | 1.00E-04 | 1.00E-04 | 1.00E-04 |
| Taes_Cul_BJBH   | 0.995767 | 1.00E-04 | 1.00E-04 | 1.00E-04 | 0.003933 |
| Taes_Cul_CAN-C1 | 0.001622 | 0.0015   | 0.996679 | 1.00E-04 | 1.00E-04 |
| Taes_Cul_CHL-C1 | 0.995306 | 0.004394 | 1.00E-04 | 1.00E-04 | 1.00E-04 |
| Taes_Cul_CZ6406 | 0.998084 | 0.001616 | 1.00E-04 | 1.00E-04 | 1.00E-04 |
| Taes_Cul_FMSY   | 0.997238 | 0.002462 | 1.00E-04 | 1.00E-04 | 1.00E-04 |
| Taes_Cul_FRA-C1 | 0.996272 | 0.003429 | 1.00E-04 | 1.00E-04 | 1.00E-04 |
| Taes_Cul_GYWLL  | 0.97556  | 0.021722 | 1.00E-04 | 1.00E-04 | 0.002518 |
| Taes_Cul_HNSH   | 0.996235 | 1.00E-04 | 1.00E-04 | 0.003465 | 1.00E-04 |
| Taes_Cul_ITA-C1 | 0.982413 | 0.005597 | 1.00E-04 | 1.00E-04 | 0.011791 |
| Taes_Cul_JCYLYL | 0.9996   | 1.00E-04 | 1.00E-04 | 1.00E-04 | 1.00E-04 |
| Taes_Cul_JM8H   | 0.960817 | 0.029932 | 1.00E-04 | 1.00E-04 | 0.009051 |
| Taes_Cul_KFEH   | 0.969403 | 0.024458 | 1.00E-04 | 1.00E-04 | 0.005939 |
| Taes_Cul_KFSH   | 0.971964 | 0.025234 | 1.00E-04 | 1.00E-04 | 0.002602 |
| Taes_Cul_KXSH   | 0.983018 | 0.014856 | 1.00E-04 | 1.00E-04 | 0.001926 |
| Taes_Cul_NLD-C1 | 0.981779 | 0.006296 | 1.00E-04 | 1.00E-04 | 0.011725 |
| Taes_Cul_NXWH   | 0.9996   | 1.00E-04 | 1.00E-04 | 1.00E-04 | 1.00E-04 |
| Taes_Cul_PYEQ   | 0.984559 | 0.001606 | 0.00124  | 1.00E-04 | 0.012495 |
| Taes_Cul_USA-C1 | 0.997843 | 1.00E-04 | 1.00E-04 | 1.00E-04 | 0.001857 |
| Taes_Cul_UZB-C1 | 0.9996   | 1.00E-04 | 1.00E-04 | 1.00E-04 | 1.00E-04 |
| Taes_Cul_XYLH   | 0.9996   | 1.00E-04 | 1.00E-04 | 1.00E-04 | 1.00E-04 |
| Taes_Cul_YASY   | 0.972921 | 0.025002 | 1.00E-04 | 1.00E-04 | 0.001877 |
| Taes_Cul_YNSW   | 0.986309 | 0.012442 | 1.00E-04 | 1.00E-04 | 0.00105  |
| Taes_Cul_ZDSH   | 0.998705 | 0.000995 | 1.00E-04 | 1.00E-04 | 1.00E-04 |
| Taes_Cul_ZYJWLQ | 0.984319 | 1.00E-04 | 1.00E-04 | 1.00E-04 | 0.015381 |
| Taes_Ind_TW025  | 0.989669 | 1.00E-04 | 1.00E-04 | 1.00E-04 | 0.010031 |
| Taes_Ind_TW026  | 0.940115 | 0.030157 | 1.00E-04 | 1.00E-04 | 0.029528 |
| Taes_Ind_TW027  | 0.972526 | 0.00361  | 1.00E-04 | 1.00E-04 | 0.023664 |
| Taes_Ind_TW028  | 0.981167 | 0.016113 | 1.00E-04 | 1.00E-04 | 0.00252  |
| Taes_Ind_TW029  | 0.982635 | 0.014706 | 1.00E-04 | 1.00E-04 | 0.002459 |
| Taes_Lan_AFG-L1 | 0.997366 | 0.002334 | 1.00E-04 | 1.00E-04 | 1.00E-04 |
| Taes_Lan_AFG-L2 | 0.991988 | 1.00E-04 | 1.00E-04 | 1.00E-04 | 0.007712 |
| Taes_Lan_AFG-L3 | 1.00E-04 | 1.00E-04 | 0.9996   | 1.00E-04 | 1.00E-04 |
| Taes_Lan_AUT-L1 | 0.001063 | 1.00E-04 | 0.998637 | 1.00E-04 | 1.00E-04 |
| Taes_Lan_BDHHM  | 0.986652 | 1.00E-04 | 1.00E-04 | 1.00E-04 | 0.013049 |
| Taes_Lan_BIH-L1 | 1.00E-04 | 1.00E-04 | 0.465945 | 0.533755 | 1.00E-04 |
| Taes_Lan_BMZ    | 0.980366 | 0.019334 | 1.00E-04 | 1.00E-04 | 1.00E-04 |

| Accession       | Q1       | Q2       | Q3       | Q4       | Q5       |
|-----------------|----------|----------|----------|----------|----------|
| Taes_Lan_BQM    | 1.00E-04 | 1.00E-04 | 0.9996   | 1.00E-04 | 1.00E-04 |
| Taes_Lan_BRA-L1 | 0.961788 | 0.037912 | 1.00E-04 | 1.00E-04 | 1.00E-04 |
| Taes_Lan_BYM    | 0.378873 | 1.00E-04 | 1.00E-04 | 0.620827 | 1.00E-04 |
| Taes_Lan_CHE-L1 | 0.000393 | 1.00E-04 | 0.999307 | 1.00E-04 | 1.00E-04 |
| Taes_Lan_CSB    | 0.983022 | 0.004137 | 1.00E-04 | 1.00E-04 | 0.012641 |
| Taes_Lan_CYHM   | 1.00E-04 | 1.00E-04 | 0.995118 | 1.00E-04 | 0.004583 |
| Taes_Lan_DEU-L1 | 1.00E-04 | 0.00266  | 0.99704  | 1.00E-04 | 1.00E-04 |
| Taes_Lan_DHM    | 0.960394 | 0.039306 | 1.00E-04 | 1.00E-04 | 1.00E-04 |
| Taes_Lan_DKM    | 0.971709 | 0.025614 | 1.00E-04 | 1.00E-04 | 0.002476 |
| Taes_Lan_DXHKYM | 0.987591 | 0.005095 | 1.00E-04 | 1.00E-04 | 0.007114 |
| Taes_Lan_DYH    | 0.980991 | 0.003794 | 1.00E-04 | 1.00E-04 | 0.015015 |
| Taes_Lan_ESP-L1 | 1.00E-04 | 1.00E-04 | 0.9996   | 1.00E-04 | 1.00E-04 |
| Taes_Lan_FIN-L1 | 1.00E-04 | 1.00E-04 | 0.998808 | 1.00E-04 | 0.000892 |
| Taes_Lan_GBR-L1 | 0.987106 | 1.00E-04 | 1.00E-04 | 1.00E-04 | 0.012594 |
| Taes_Lan_GEO-L1 | 1.00E-04 | 1.00E-04 | 0.9996   | 1.00E-04 | 1.00E-04 |
| Taes_Lan_GRC-L1 | 1.00E-04 | 1.00E-04 | 0.9996   | 1.00E-04 | 1.00E-04 |
| Taes_Lan_HCM    | 0.9996   | 1.00E-04 | 1.00E-04 | 1.00E-04 | 1.00E-04 |
| Taes_Lan_HLM    | 0.9996   | 1.00E-04 | 1.00E-04 | 1.00E-04 | 1.00E-04 |
| Taes_Lan_HM     | 0.930007 | 0.060861 | 1.00E-04 | 1.00E-04 | 0.008933 |
| Taes_Lan_HMM    | 0.978662 | 0.007496 | 1.00E-04 | 1.00E-04 | 0.013641 |
| Taes_Lan_HRV-L1 | 0.964184 | 0.001545 | 1.00E-04 | 1.00E-04 | 0.034071 |
| Taes_Lan_HTZ    | 0.9996   | 1.00E-04 | 1.00E-04 | 1.00E-04 | 1.00E-04 |
| Taes_Lan_HUN-L1 | 0.990634 | 1.00E-04 | 1.00E-04 | 1.00E-04 | 0.009066 |
| Taes_Lan_HZB    | 0.977796 | 0.007459 | 1.00E-04 | 1.00E-04 | 0.014546 |
| Taes_Lan_IND-L1 | 0.991753 | 1.00E-04 | 1.00E-04 | 1.00E-04 | 0.007947 |
| Taes_Lan_IND-L2 | 0.96682  | 0.003952 | 1.00E-04 | 1.00E-04 | 0.029027 |
| Taes_Lan_IRN-L1 | 1.00E-04 | 1.00E-04 | 0.9996   | 1.00E-04 | 1.00E-04 |
| Taes_Lan_IRN-L2 | 1.00E-04 | 1.00E-04 | 0.9996   | 1.00E-04 | 1.00E-04 |
| Taes_Lan_IRN-L3 | 1.00E-04 | 1.00E-04 | 0.9996   | 1.00E-04 | 1.00E-04 |
| Taes_Lan_IRN-L4 | 0.005544 | 1.00E-04 | 0.994156 | 1.00E-04 | 1.00E-04 |
| Taes_Lan_IRQ-L1 | 0.975451 | 1.00E-04 | 1.00E-04 | 1.00E-04 | 0.024249 |
| Taes_Lan_IRQ-L2 | 1.00E-04 | 1.00E-04 | 0.99739  | 1.00E-04 | 0.00231  |
| Taes_Lan_IRQ-L3 | 1.00E-04 | 1.00E-04 | 0.9996   | 1.00E-04 | 1.00E-04 |
| Taes_Lan_IRQ-L4 | 1.00E-04 | 1.00E-04 | 0.9996   | 1.00E-04 | 1.00E-04 |
| Taes_Lan_ITA-L1 | 0.992479 | 1.00E-04 | 0.000386 | 1.00E-04 | 0.006935 |
| Taes_Lan_ITA-L2 | 0.991334 | 0.008366 | 1.00E-04 | 1.00E-04 | 1.00E-04 |
| Taes_Lan_JiaHM  | 1.00E-04 | 1.00E-04 | 0.106521 | 0.893179 | 1.00E-04 |
| Taes_Lan_JinHM  | 0.951961 | 0.01582  | 1.00E-04 | 1.00E-04 | 0.032019 |
| Taes_Lan_JM     | 1.00E-04 | 1.00E-04 | 0.9996   | 1.00E-04 | 1.00E-04 |
| Taes_Lan_JPN-L1 | 1.00E-04 | 1.00E-04 | 0.998121 | 1.00E-04 | 0.001579 |
| Taes_Lan_KAZ-L1 | 0.99634  | 0.003098 | 0.000361 | 1.00E-04 | 1.00E-04 |
| Taes_Lan_KSBP   | 1.00E-04 | 1.00E-04 | 0.989924 | 0.009776 | 1.00E-04 |
| Taes_Lan_LGD    | 1.00E-04 | 1.00E-04 | 0.690759 | 0.308941 | 1.00E-04 |

| Accession       | Q1       | Q2       | Q3       | Q4       | Q5       |
|-----------------|----------|----------|----------|----------|----------|
| Taes_Lan_LLX    | 0.990916 | 1.00E-04 | 1.00E-04 | 1.00E-04 | 0.008784 |
| Taes_Lan_LM     | 1.00E-04 | 1.00E-04 | 1.00E-04 | 0.9996   | 1.00E-04 |
| Taes_Lan_LTT    | 0.000154 | 1.00E-04 | 0.999546 | 1.00E-04 | 1.00E-04 |
| Taes_Lan_LXZXM  | 0.982905 | 0.013349 | 1.00E-04 | 1.00E-04 | 0.003545 |
| Taes_Lan_LZT    | 0.995772 | 0.003766 | 1.00E-04 | 1.00E-04 | 0.000263 |
| Taes_Lan_MEX-L1 | 1.00E-04 | 1.00E-04 | 0.9996   | 1.00E-04 | 1.00E-04 |
| Taes_Lan_MKD-L1 | 1.00E-04 | 1.00E-04 | 1.00E-04 | 0.9996   | 1.00E-04 |
| Taes_Lan_MXM    | 1.00E-04 | 1.00E-04 | 0.9996   | 1.00E-04 | 1.00E-04 |
| Taes_Lan_NLD-L1 | 0.9996   | 1.00E-04 | 1.00E-04 | 1.00E-04 | 1.00E-04 |
| Taes_Lan_PAK-L1 | 0.990516 | 1.00E-04 | 1.00E-04 | 1.00E-04 | 0.009184 |
| Taes_Lan_PAK-L2 | 0.972799 | 0.026901 | 1.00E-04 | 1.00E-04 | 1.00E-04 |
| Taes_Lan_PAK-L3 | 0.9996   | 1.00E-04 | 1.00E-04 | 1.00E-04 | 1.00E-04 |
| Taes_Lan_PRT-L1 | 1.00E-04 | 1.00E-04 | 0.9996   | 1.00E-04 | 1.00E-04 |
| Taes_Lan_QCM    | 0.985372 | 0.009439 | 1.00E-04 | 1.00E-04 | 0.00499  |
| Taes_Lan_ROM-L1 | 0.973659 | 1.00E-04 | 1.00E-04 | 1.00E-04 | 0.026041 |
| Taes_Lan_RUS-L1 | 1.00E-04 | 1.00E-04 | 0.9996   | 1.00E-04 | 1.00E-04 |
| Taes_Lan_SLZ    | 0.995083 | 0.004617 | 1.00E-04 | 1.00E-04 | 1.00E-04 |
| Taes_Lan_SM     | 0.979389 | 0.005992 | 1.00E-04 | 1.00E-04 | 0.014419 |
| Taes_Lan_SRB-L1 | 0.984091 | 1.00E-04 | 1.00E-04 | 1.00E-04 | 0.015609 |
| Taes_Lan_SRM4H  | 0.996587 | 0.000908 | 1.00E-04 | 0.002305 | 1.00E-04 |
| Taes_Lan_SWE-L1 | 0.990946 | 0.008754 | 1.00E-04 | 1.00E-04 | 1.00E-04 |
| Taes_Lan_SYR-L1 | 1.00E-04 | 1.00E-04 | 0.9996   | 1.00E-04 | 1.00E-04 |
| Taes_Lan_SYR-L2 | 1.00E-04 | 1.00E-04 | 0.997374 | 1.00E-04 | 0.002326 |
| Taes_Lan_TJBXM  | 0.982435 | 0.009465 | 1.00E-04 | 0.002957 | 0.005043 |
| Taes_Lan_TJK-L1 | 0.969933 | 0.009223 | 1.00E-04 | 1.00E-04 | 0.020645 |
| Taes_Lan_TMM    | 0.979281 | 0.020419 | 1.00E-04 | 1.00E-04 | 1.00E-04 |
| Taes_Lan_TUR-L1 | 1.00E-04 | 1.00E-04 | 0.9996   | 1.00E-04 | 1.00E-04 |
| Taes_Lan_TUR-L2 | 1.00E-04 | 1.00E-04 | 0.998996 | 1.00E-04 | 0.000704 |
| Taes_Lan_TUR-L3 | 1.00E-04 | 1.00E-04 | 0.9996   | 1.00E-04 | 1.00E-04 |
| Taes_Lan_TUR-L4 | 1.00E-04 | 0.000681 | 0.99902  | 1.00E-04 | 1.00E-04 |
| Taes_Lan_TW050  | 0.981832 | 0.006528 | 1.00E-04 | 1.00E-04 | 0.011439 |
| Taes_Lan_TW051  | 0.983443 | 1.00E-04 | 1.00E-04 | 1.00E-04 | 0.016257 |
| Taes_Lan_TW052  | 1.00E-04 | 0.0004   | 0.961332 | 0.038068 | 1.00E-04 |
| Taes_Lan_TW053  | 0.981877 | 0.003198 | 1.00E-04 | 1.00E-04 | 0.014725 |
| Taes_Lan_TW054  | 0.982704 | 0.016997 | 1.00E-04 | 1.00E-04 | 1.00E-04 |
| Taes_Lan_UKR-L1 | 0.000605 | 1.00E-04 | 0.999095 | 1.00E-04 | 1.00E-04 |
| Taes_Lan_UKR-L2 | 0.993873 | 0.005828 | 1.00E-04 | 1.00E-04 | 1.00E-04 |
| Taes_Lan_URY-L1 | 0.947541 | 0.052159 | 1.00E-04 | 1.00E-04 | 1.00E-04 |
| Taes_Lan_URY-L2 | 0.9996   | 1.00E-04 | 1.00E-04 | 1.00E-04 | 1.00E-04 |
| Taes_Lan_UZB-L1 | 0.9996   | 1.00E-04 | 1.00E-04 | 1.00E-04 | 1.00E-04 |
| Taes_Lan_WYM    | 0.971474 | 0.020956 | 1.00E-04 | 1.00E-04 | 0.00737  |
| Taes_Lan_XFS    | 0.973656 | 1.00E-04 | 1.00E-04 | 1.00E-04 | 0.026045 |
| Taes_Lan_XHP    | 0.9996   | 1.00E-04 | 1.00E-04 | 1.00E-04 | 1.00E-04 |

| Accession      | Q1       | Q2       | Q3       | Q4       | Q5       |
|----------------|----------|----------|----------|----------|----------|
| Taes_Lan_YM    | 1.00E-04 | 1.00E-04 | 0.9996   | 1.00E-04 | 1.00E-04 |
| Taes_Lan_YMBF  | 0.995422 | 0.004278 | 1.00E-04 | 1.00E-04 | 1.00E-04 |
| Taes_Lan_YZM   | 0.953329 | 0.037941 | 1.00E-04 | 1.00E-04 | 0.008531 |
| Taes_Lan_ZJH   | 0.992829 | 0.006871 | 1.00E-04 | 1.00E-04 | 1.00E-04 |
| Taes_Lan_ZP    | 0.015176 | 1.00E-04 | 1.00E-04 | 0.984524 | 1.00E-04 |
| Taes_Lan_ZWT   | 1.00E-04 | 1.00E-04 | 0.9996   | 1.00E-04 | 1.00E-04 |
| Taes_Mac_TW006 | 1.00E-04 | 1.00E-04 | 0.939737 | 0.057041 | 0.003022 |
| Taes_Mac_TW007 | 0.002576 | 1.00E-04 | 0.972987 | 0.024236 | 1.00E-04 |
| Taes_Mac_TW008 | 1.00E-04 | 0.003631 | 0.921667 | 0.074502 | 1.00E-04 |
| Taes_Mac_TW009 | 1.00E-04 | 1.00E-04 | 0.971812 | 0.027888 | 1.00E-04 |
| Taes_Mac_TW010 | 1.00E-04 | 1.00E-04 | 0.938401 | 0.061299 | 1.00E-04 |
| Taes_Spe_TW011 | 1.00E-04 | 0.004735 | 0.95929  | 0.035775 | 1.00E-04 |
| Taes_Spe_TW012 | 1.00E-04 | 0.003795 | 0.877805 | 0.1182   | 1.00E-04 |
| Taes_Spe_TW013 | 1.00E-04 | 1.00E-04 | 0.921988 | 0.069599 | 0.008213 |
| Taes_Spe_TW014 | 1.00E-04 | 1.00E-04 | 0.950462 | 0.041114 | 0.008224 |
| Taes_Spe_TW015 | 0.002344 | 1.00E-04 | 0.977109 | 0.020346 | 1.00E-04 |
| Taes_Spe_TW016 | 0.000311 | 1.00E-04 | 0.972883 | 0.026606 | 1.00E-04 |
| Taes_Spe_TW017 | 1.00E-04 | 1.00E-04 | 0.93189  | 0.065453 | 0.002457 |
| Taes_Spe_TW018 | 0.004381 | 1.00E-04 | 0.977911 | 0.017508 | 1.00E-04 |
| Taes_Spe_TW019 | 1.00E-04 | 1.00E-04 | 0.922641 | 0.074384 | 0.002775 |
| Taes_Spe_TW020 | 1.00E-04 | 1.00E-04 | 0.946182 | 0.052116 | 0.001502 |
| Taes_Spe_TW021 | 1.00E-04 | 1.00E-04 | 0.92605  | 0.07365  | 1.00E-04 |
| Taes_Spe_TW022 | 1.00E-04 | 1.00E-04 | 0.906181 | 0.091956 | 0.001664 |
| Taes_Spe_TW023 | 0.004107 | 1.00E-04 | 0.877798 | 0.117896 | 1.00E-04 |
| Taes_Spe_TW024 | 1.00E-04 | 1.00E-04 | 0.973347 | 0.026353 | 1.00E-04 |
| Taes_Tib_TW035 | 0.959673 | 0.040027 | 1.00E-04 | 1.00E-04 | 1.00E-04 |
| Taes_Tib_TW036 | 0.92828  | 0.033415 | 1.00E-04 | 1.00E-04 | 0.038105 |
| Taes_Tib_TW037 | 0.982345 | 0.017355 | 1.00E-04 | 1.00E-04 | 1.00E-04 |
| Taes_Tib_TW038 | 0.966927 | 0.028519 | 1.00E-04 | 1.00E-04 | 0.004354 |
| Taes_Tib_TW039 | 0.995202 | 0.002557 | 1.00E-04 | 1.00E-04 | 0.002042 |
| Taes_Yun_TW030 | 0.9996   | 1.00E-04 | 1.00E-04 | 1.00E-04 | 1.00E-04 |
| Taes_Yun_TW031 | 1.00E-04 | 1.00E-04 | 0.959449 | 0.033131 | 0.00722  |
| Taes_Yun_TW032 | 0.989512 | 1.00E-04 | 1.00E-04 | 1.00E-04 | 0.010188 |
| Taes_Yun_TW033 | 0.98595  | 0.000265 | 1.00E-04 | 1.00E-04 | 0.013586 |
| Taes_Yun_TW034 | 0.981663 | 0.004232 | 1.00E-04 | 1.00E-04 | 0.013905 |
| Tisp_Isp_B103  | 0.996122 | 0.003578 | 1.00E-04 | 1.00E-04 | 1.00E-04 |
| Tisp_Isp_B104  | 0.996992 | 0.002708 | 1.00E-04 | 1.00E-04 | 1.00E-04 |
| Tisp_Isp_B105  | 0.992049 | 0.004719 | 0.000828 | 1.00E-04 | 0.002305 |
| Tisp_Isp_B106  | 0.984704 | 0.014996 | 1.00E-04 | 1.00E-04 | 1.00E-04 |
| Tisp_Isp_B107  | 0.98675  | 0.001328 | 1.00E-04 | 1.00E-04 | 0.011722 |
| Tisp_Isp_B108  | 0.974054 | 0.025646 | 1.00E-04 | 1.00E-04 | 1.00E-04 |
| Tisp_Isp_B109  | 0.986175 | 1.00E-04 | 1.00E-04 | 1.00E-04 | 0.013525 |
| Tkar_Geo_B110  | 0.982631 | 1.00E-04 | 1.00E-04 | 1.00E-04 | 0.017069 |

| Accession     | Q1       | Q2       | Q3       | Q4       | Q5       |
|---------------|----------|----------|----------|----------|----------|
| Tkar_Geo_B111 | 0.971499 | 0.02395  | 1.00E-04 | 1.00E-04 | 0.004352 |
| Tkar_Geo_B112 | 0.999593 | 1.00E-04 | 1.00E-04 | 1.00E-04 | 0.000107 |
| Tmon_Dom_A031 | 1.00E-04 | 0.998694 | 0.001006 | 1.00E-04 | 1.00E-04 |
| Tmon_Dom_A032 | 0.003278 | 0.996422 | 1.00E-04 | 1.00E-04 | 1.00E-04 |
| Tmon_Dom_A033 | 1.00E-04 | 0.9996   | 1.00E-04 | 1.00E-04 | 1.00E-04 |
| Tmon_Dom_A034 | 1.00E-04 | 0.998707 | 0.000993 | 1.00E-04 | 1.00E-04 |
| Tmon_Dom_A036 | 1.00E-04 | 0.987474 | 0.001187 | 1.00E-04 | 0.011139 |
| Tmon_Dom_A037 | 0.005455 | 0.988708 | 1.00E-04 | 1.00E-04 | 0.005637 |
| Tmon_Dom_A038 | 1.00E-04 | 0.9996   | 1.00E-04 | 1.00E-04 | 1.00E-04 |
| Tmon_Dom_A040 | 1.00E-04 | 0.9996   | 1.00E-04 | 1.00E-04 | 1.00E-04 |
| Tmon_Dom_A041 | 1.00E-04 | 0.9996   | 1.00E-04 | 1.00E-04 | 1.00E-04 |
| Tmon_Dom_A042 | 0.020241 | 0.97946  | 1.00E-04 | 1.00E-04 | 1.00E-04 |
| Tmon_Dom_A044 | 1.00E-04 | 0.9996   | 1.00E-04 | 1.00E-04 | 1.00E-04 |
| Tmon_Dom_A045 | 1.00E-04 | 0.9996   | 1.00E-04 | 1.00E-04 | 1.00E-04 |
| Tmon_Dom_A046 | 0.024894 | 0.974807 | 1.00E-04 | 1.00E-04 | 1.00E-04 |
| Tmon_Dom_A047 | 1.00E-04 | 0.998792 | 0.000909 | 1.00E-04 | 1.00E-04 |
| Tmon_Dom_A048 | 0.017755 | 0.981945 | 1.00E-04 | 1.00E-04 | 1.00E-04 |
| Tmon_Dom_A050 | 0.012896 | 0.966965 | 1.00E-04 | 1.00E-04 | 0.019939 |
| Tmon_Dom_A051 | 1.00E-04 | 0.978892 | 1.00E-04 | 1.00E-04 | 0.020809 |
| Tmon_Dom_A053 | 1.00E-04 | 0.9996   | 1.00E-04 | 1.00E-04 | 1.00E-04 |
| Tmon_Dom_A054 | 1.00E-04 | 0.985187 | 1.00E-04 | 1.00E-04 | 0.014513 |
| Tmon_Dom_A055 | 0.029214 | 0.958322 | 1.00E-04 | 1.00E-04 | 0.012265 |
| Tmon_Dom_A056 | 0.013959 | 0.985741 | 1.00E-04 | 1.00E-04 | 1.00E-04 |
| Tmon_Dom_A057 | 0.004918 | 0.994782 | 1.00E-04 | 1.00E-04 | 1.00E-04 |
| Tmon_Dom_A059 | 0.016893 | 0.962514 | 1.00E-04 | 1.00E-04 | 0.020393 |
| Tmon_Dom_A060 | 1.00E-04 | 0.9996   | 1.00E-04 | 1.00E-04 | 1.00E-04 |
| Tmon_Wil_A001 | 0.027526 | 0.962836 | 1.00E-04 | 1.00E-04 | 0.009438 |
| Tmon_Wil_A002 | 0.013404 | 0.963633 | 1.00E-04 | 1.00E-04 | 0.022763 |
| Tmon_Wil_A003 | 0.002902 | 0.996193 | 1.00E-04 | 1.00E-04 | 0.000705 |
| Tmon_Wil_A004 | 0.025867 | 0.948669 | 1.00E-04 | 1.00E-04 | 0.025264 |
| Tmon_Wil_A005 | 0.003113 | 0.985687 | 1.00E-04 | 1.00E-04 | 0.010999 |
| Tmon_Wil_A006 | 0.034675 | 0.962589 | 0.002536 | 1.00E-04 | 1.00E-04 |
| Tmon_Wil_A007 | 0.004629 | 0.9743   | 1.00E-04 | 1.00E-04 | 0.020871 |
| Tmon_Wil_A008 | 0.017125 | 0.982575 | 1.00E-04 | 1.00E-04 | 1.00E-04 |
| Tmon_Wil_A009 | 0.023952 | 0.952801 | 1.00E-04 | 1.00E-04 | 0.023047 |
| Tmon_Wil_A010 | 0.033335 | 0.964323 | 1.00E-04 | 1.00E-04 | 0.002143 |
| Tmon_Wil_A011 | 0.034445 | 0.937379 | 1.00E-04 | 1.00E-04 | 0.027976 |
| Tmon_Wil_A012 | 0.022059 | 0.950941 | 1.00E-04 | 1.00E-04 | 0.026801 |
| Tmon_Wil_A013 | 0.049591 | 0.89572  | 1.00E-04 | 1.00E-04 | 0.054489 |
| Tmon_Wil_A014 | 0.012085 | 0.958168 | 1.00E-04 | 1.00E-04 | 0.029547 |
| Tmon_Wil_A015 | 0.058863 | 0.940837 | 1.00E-04 | 1.00E-04 | 1.00E-04 |
| Tmon_Wil_A017 | 0.03261  | 0.942697 | 1.00E-04 | 1.00E-04 | 0.024493 |
| Tmon_Wil_A018 | 0.040294 | 0.935035 | 1.00E-04 | 1.00E-04 | 0.024471 |



| Accession      | Q1       | Q2       | Q3       | Q4       | Q5       |
|----------------|----------|----------|----------|----------|----------|
| Tmon_Wil_A019  | 0.079884 | 0.913315 | 1.00E-04 | 1.00E-04 | 0.006602 |
| Tmon_Wil_A021  | 0.020665 | 0.957341 | 1.00E-04 | 1.00E-04 | 0.021794 |
| Tmon_Wil_A022  | 0.035011 | 0.93602  | 1.00E-04 | 1.00E-04 | 0.028769 |
| Tmon_Wil_A023  | 0.031119 | 0.954153 | 1.00E-04 | 1.00E-04 | 0.014528 |
| Tmon_Wil_A024  | 0.029411 | 0.954473 | 1.00E-04 | 1.00E-04 | 0.015916 |
| Tmon_Wil_A026  | 0.026393 | 0.969915 | 1.00E-04 | 1.00E-04 | 0.003492 |
| Tmon_Wil_A027  | 0.010991 | 0.97976  | 1.00E-04 | 1.00E-04 | 0.00905  |
| Tmon_Wil_A028  | 0.026905 | 0.961354 | 1.00E-04 | 1.00E-04 | 0.011541 |
| Tmon_Wil_A029  | 0.072762 | 0.926938 | 1.00E-04 | 1.00E-04 | 1.00E-04 |
| Tmon_Wil_A030  | 0.057358 | 0.93212  | 1.00E-04 | 1.00E-04 | 0.010322 |
| Tpet_Xin_TW040 | 0.991187 | 1.00E-04 | 1.00E-04 | 1.00E-04 | 0.008513 |
| Tpet_Xin_TW041 | 0.998882 | 1.00E-04 | 0.000819 | 1.00E-04 | 1.00E-04 |
| Tpet_Xin_TW043 | 0.980232 | 0.000235 | 0.000811 | 1.00E-04 | 0.018622 |
| Tpet_Xin_TW044 | 0.989129 | 0.010571 | 1.00E-04 | 1.00E-04 | 1.00E-04 |
| Tsin_Dom_A061  | 1.00E-04 | 0.9996   | 1.00E-04 | 1.00E-04 | 1.00E-04 |
| Ttur_Dom_B063  | 0.982452 | 0.00247  | 0.000279 | 1.00E-04 | 0.014699 |
| Ttur_Dom_B064  | 0.98289  | 0.014869 | 1.00E-04 | 1.00E-04 | 0.002041 |
| Ttur_Dom_B065  | 0.970914 | 0.022282 | 1.00E-04 | 1.00E-04 | 0.006604 |
| Ttur_Dom_B066  | 0.99583  | 0.00387  | 1.00E-04 | 1.00E-04 | 1.00E-04 |
| Ttur_Dom_B067  | 0.967253 | 1.00E-04 | 0.000317 | 1.00E-04 | 0.032229 |
| Ttur_Dom_B068  | 0.99558  | 0.00412  | 1.00E-04 | 1.00E-04 | 1.00E-04 |
| Ttur_Dom_B069  | 0.994621 | 0.005079 | 1.00E-04 | 1.00E-04 | 1.00E-04 |
| Ttur_Dom_B070  | 0.980109 | 0.003136 | 1.00E-04 | 1.00E-04 | 0.016555 |
| Ttur_Dom_B071  | 0.98733  | 0.01144  | 0.001029 | 1.00E-04 | 1.00E-04 |
| Ttur_Dom_B072  | 0.964275 | 0.002638 | 1.00E-04 | 1.00E-04 | 0.032888 |
| Ttur_Dom_B073  | 0.9996   | 1.00E-04 | 1.00E-04 | 1.00E-04 | 1.00E-04 |
| Ttur_Dom_B074  | 0.983779 | 0.013953 | 1.00E-04 | 1.00E-04 | 0.002068 |
| Ttur_Dom_B075  | 0.997119 | 0.001757 | 1.00E-04 | 1.00E-04 | 0.000924 |
| Ttur_Dom_B076  | 0.97176  | 0.024969 | 1.00E-04 | 1.00E-04 | 0.003071 |
| Ttur_Dom_B077  | 0.968959 | 0.024324 | 1.00E-04 | 1.00E-04 | 0.006517 |
| Ttur_Dom_B078  | 0.9996   | 1.00E-04 | 1.00E-04 | 1.00E-04 | 1.00E-04 |
| Ttur_Dom_B079  | 0.974956 | 0.008815 | 1.00E-04 | 1.00E-04 | 0.016029 |
| Ttur_Dom_B080  | 0.961429 | 0.038271 | 1.00E-04 | 1.00E-04 | 1.00E-04 |
| Ttur_Dom_B081  | 0.992041 | 1.00E-04 | 1.00E-04 | 1.00E-04 | 0.007659 |
| Ttur_Dom_B082  | 0.995652 | 0.004048 | 1.00E-04 | 1.00E-04 | 1.00E-04 |
| Ttur_Dom_B083  | 0.994447 | 0.005254 | 1.00E-04 | 1.00E-04 | 1.00E-04 |
| Ttur_Dom_B084  | 0.990911 | 1.00E-04 | 1.00E-04 | 1.00E-04 | 0.008789 |
| Ttur_Dom_B085  | 0.968938 | 0.021988 | 1.00E-04 | 1.00E-04 | 0.008874 |
| Ttur_Dom_B086  | 0.996372 | 0.003328 | 1.00E-04 | 1.00E-04 | 1.00E-04 |
| Ttur_Dom_B087  | 0.9749   | 0.01682  | 1.00E-04 | 1.00E-04 | 0.00808  |
| Ttur_Dom_B088  | 0.97835  | 1.00E-04 | 1.00E-04 | 1.00E-04 | 0.02135  |
| Ttur_Dom_B089  | 0.990843 | 1.00E-04 | 1.00E-04 | 1.00E-04 | 0.008857 |
| Ttur_Dom_B090  | 0.982888 | 0.016812 | 1.00E-04 | 1.00E-04 | 1.00E-04 |

| Accession     | Q1       | Q2       | Q3       | Q4       | Q5       |
|---------------|----------|----------|----------|----------|----------|
| Ttur_Dom_B091 | 0.960145 | 0.039556 | 1.00E-04 | 1.00E-04 | 1.00E-04 |
| Ttur_Dur_B113 | 0.984633 | 0.012581 | 1.00E-04 | 1.00E-04 | 0.002586 |
| Ttur_Dur_B114 | 0.989893 | 1.00E-04 | 1.00E-04 | 1.00E-04 | 0.009807 |
| Ttur_Dur_B115 | 0.997222 | 1.00E-04 | 1.00E-04 | 1.00E-04 | 0.002479 |
| Ttur_Dur_B116 | 0.997236 | 0.002464 | 1.00E-04 | 1.00E-04 | 1.00E-04 |
| Ttur_Dur_B117 | 0.9996   | 1.00E-04 | 1.00E-04 | 1.00E-04 | 1.00E-04 |
| Ttur_Dur_B118 | 0.988921 | 1.00E-04 | 1.00E-04 | 1.00E-04 | 0.010779 |
| Ttur_Dur_B119 | 0.9996   | 1.00E-04 | 1.00E-04 | 1.00E-04 | 1.00E-04 |
| Ttur_Dur_B120 | 0.9996   | 1.00E-04 | 1.00E-04 | 1.00E-04 | 1.00E-04 |
| Ttur_Dur_B121 | 0.996579 | 0.003121 | 1.00E-04 | 1.00E-04 | 1.00E-04 |
| Ttur_Dur_B122 | 0.979999 | 0.018699 | 1.00E-04 | 1.00E-04 | 0.001102 |
| Ttur_Dur_B123 | 0.970303 | 0.025746 | 1.00E-04 | 1.00E-04 | 0.003751 |
| Ttur_Dur_B124 | 0.99619  | 0.00351  | 1.00E-04 | 1.00E-04 | 1.00E-04 |
| Ttur_Dur_B125 | 0.98318  | 1.00E-04 | 1.00E-04 | 1.00E-04 | 0.01652  |
| Ttur_Kho_B053 | 0.9996   | 1.00E-04 | 1.00E-04 | 1.00E-04 | 1.00E-04 |
| Ttur_Kho_B054 | 0.976323 | 1.00E-04 | 1.00E-04 | 1.00E-04 | 0.023377 |
| Ttur_Kho_B055 | 0.97119  | 1.00E-04 | 1.00E-04 | 1.00E-04 | 0.02851  |
| Ttur_Kho_B056 | 0.978799 | 0.020901 | 1.00E-04 | 1.00E-04 | 1.00E-04 |
| Ttur_Kho_B057 | 0.983374 | 0.016326 | 1.00E-04 | 1.00E-04 | 1.00E-04 |
| Ttur_Kho_B058 | 0.95575  | 0.028884 | 1.00E-04 | 1.00E-04 | 0.015166 |
| Ttur_Kho_B059 | 0.980984 | 1.00E-04 | 1.00E-04 | 1.00E-04 | 0.018716 |
| Ttur_Kho_B060 | 0.989518 | 1.00E-04 | 1.00E-04 | 1.00E-04 | 0.010183 |
| Ttur_Kho_B061 | 0.967559 | 0.01538  | 1.00E-04 | 1.00E-04 | 0.01686  |
| Ttur_Kho_B062 | 0.9996   | 1.00E-04 | 1.00E-04 | 1.00E-04 | 1.00E-04 |
| Ttur_Per_B093 | 0.970124 | 0.021098 | 1.00E-04 | 1.00E-04 | 0.008577 |
| Ttur_Per_B094 | 0.971676 | 0.028024 | 1.00E-04 | 1.00E-04 | 1.00E-04 |
| Ttur_Per_B096 | 0.989858 | 1.00E-04 | 1.00E-04 | 1.00E-04 | 0.009842 |
| Ttur_Per_B097 | 0.969416 | 0.025612 | 1.00E-04 | 1.00E-04 | 0.004773 |
| Ttur_Per_B098 | 0.998767 | 1.00E-04 | 0.000934 | 1.00E-04 | 1.00E-04 |
| Ttur_Per_B099 | 0.949799 | 0.049901 | 1.00E-04 | 1.00E-04 | 1.00E-04 |
| Ttur_Per_B100 | 0.995932 | 1.00E-04 | 1.00E-04 | 1.00E-04 | 0.003768 |
| Ttur_Per_B101 | 0.9996   | 1.00E-04 | 1.00E-04 | 1.00E-04 | 1.00E-04 |
| Ttur_Per_B102 | 0.992665 | 0.007035 | 1.00E-04 | 1.00E-04 | 1.00E-04 |
| Ttur_Pol_B013 | 0.988527 | 0.011173 | 1.00E-04 | 1.00E-04 | 1.00E-04 |
| Ttur_Pol_B014 | 0.990705 | 1.00E-04 | 1.00E-04 | 1.00E-04 | 0.008995 |
| Ttur_Pol_B015 | 0.974559 | 0.020833 | 1.00E-04 | 1.00E-04 | 0.004409 |
| Ttur_Pol_B016 | 0.982077 | 0.003625 | 1.00E-04 | 1.00E-04 | 0.014099 |
| Ttur_Pol_B017 | 0.983069 | 0.013218 | 1.00E-04 | 1.00E-04 | 0.003513 |
| Ttur_Pol_B018 | 0.9996   | 1.00E-04 | 1.00E-04 | 1.00E-04 | 1.00E-04 |
| Ttur_Pol_B019 | 0.989798 | 1.00E-04 | 1.00E-04 | 1.00E-04 | 0.009902 |
| Ttur_Pol_B020 | 0.992426 | 0.007274 | 1.00E-04 | 1.00E-04 | 1.00E-04 |
| Ttur_Pol_B021 | 0.983219 | 0.016481 | 1.00E-04 | 1.00E-04 | 1.00E-04 |
| Ttur_Pol_B022 | 0.935314 | 0.05027  | 1.00E-04 | 1.00E-04 | 0.014216 |

| Accession     | Q1       | Q2       | Q3       | Q4       | Q5       |
|---------------|----------|----------|----------|----------|----------|
| Ttur_Riv_B001 | 0.984293 | 1.00E-04 | 1.00E-04 | 1.00E-04 | 0.015407 |
| Ttur_Riv_B002 | 0.98481  | 0.014891 | 1.00E-04 | 1.00E-04 | 1.00E-04 |
| Ttur_Riv_B003 | 0.977016 | 1.00E-04 | 1.00E-04 | 1.00E-04 | 0.022684 |
| Ttur_Riv_B004 | 0.986678 | 0.012841 | 1.00E-04 | 1.00E-04 | 0.000281 |
| Ttur_Riv_B005 | 0.980302 | 0.011691 | 1.00E-04 | 1.00E-04 | 0.007807 |
| Ttur_Riv_B006 | 0.982318 | 1.00E-04 | 1.00E-04 | 1.00E-04 | 0.017382 |
| Ttur_Riv_B007 | 0.967358 | 1.00E-04 | 1.00E-04 | 1.00E-04 | 0.032342 |
| Ttur_Riv_B008 | 0.9996   | 1.00E-04 | 1.00E-04 | 1.00E-04 | 1.00E-04 |
| Ttur_Riv_B009 | 0.990794 | 0.008906 | 1.00E-04 | 1.00E-04 | 1.00E-04 |
| Ttur_Riv_B010 | 0.995251 | 0.003283 | 1.00E-04 | 1.00E-04 | 0.001267 |
| Ttur_Riv_B011 | 0.974079 | 1.00E-04 | 1.00E-04 | 1.00E-04 | 0.025621 |
| Ttur_Riv_B012 | 0.9996   | 1.00E-04 | 1.00E-04 | 1.00E-04 | 1.00E-04 |
| Ttur_Ukn_B051 | 0.994232 | 1.00E-04 | 1.00E-04 | 1.00E-04 | 0.005468 |
| Ttur_Ukn_B092 | 0.078034 | 0.424871 | 0.008544 | 1.00E-04 | 0.488451 |
| Ttur_Unk_B043 | 0.103943 | 0.439693 | 0.00839  | 1.00E-04 | 0.447873 |
| Ttur_Wil_B023 | 0.971045 | 0.026263 | 1.00E-04 | 1.00E-04 | 0.002493 |
| Ttur_Wil_B024 | 0.993799 | 0.005901 | 1.00E-04 | 1.00E-04 | 1.00E-04 |
| Ttur_Wil_B025 | 0.978355 | 0.021345 | 1.00E-04 | 1.00E-04 | 1.00E-04 |
| Ttur_Wil_B026 | 0.974297 | 1.00E-04 | 1.00E-04 | 1.00E-04 | 0.025403 |
| Ttur_Wil_B027 | 0.947971 | 0.051729 | 1.00E-04 | 1.00E-04 | 1.00E-04 |
| Ttur_Wil_B028 | 0.988897 | 0.000944 | 1.00E-04 | 1.00E-04 | 0.009959 |
| Ttur_Wil_B029 | 0.970351 | 0.009309 | 0.000822 | 1.00E-04 | 0.019418 |
| Ttur_Wil_B030 | 0.980072 | 0.006319 | 1.00E-04 | 1.00E-04 | 0.013409 |
| Ttur_Wil_B031 | 0.9996   | 1.00E-04 | 1.00E-04 | 1.00E-04 | 1.00E-04 |
| Ttur_Wil_B032 | 0.995306 | 0.004394 | 1.00E-04 | 1.00E-04 | 1.00E-04 |
| Ttur_Wil_B033 | 0.958861 | 0.03288  | 1.00E-04 | 1.00E-04 | 0.008059 |
| Ttur_Wil_B034 | 0.990624 | 1.00E-04 | 1.00E-04 | 1.00E-04 | 0.009076 |
| Ttur_Wil_B035 | 0.970769 | 0.028001 | 1.00E-04 | 1.00E-04 | 0.00103  |
| Ttur_Wil_B036 | 0.997684 | 0.001997 | 1.00E-04 | 1.00E-04 | 0.000118 |
| Ttur_Wil_B037 | 0.977014 | 0.022687 | 1.00E-04 | 1.00E-04 | 1.00E-04 |
| Ttur_Wil_B038 | 0.973744 | 1.00E-04 | 1.00E-04 | 1.00E-04 | 0.025956 |
| Ttur_Wil_B039 | 0.997694 | 0.002006 | 1.00E-04 | 1.00E-04 | 1.00E-04 |
| Ttur_Wil_B040 | 0.944151 | 0.033647 | 1.00E-04 | 1.00E-04 | 0.022003 |
| Ttur_Wil_B041 | 0.9996   | 1.00E-04 | 1.00E-04 | 1.00E-04 | 1.00E-04 |
| Ttur_Wil_B042 | 0.954877 | 0.021511 | 1.00E-04 | 1.00E-04 | 0.023413 |
| Ttur_Wil_B044 | 0.976268 | 0.023433 | 1.00E-04 | 1.00E-04 | 1.00E-04 |
| Ttur_Wil_B045 | 0.995316 | 0.004384 | 1.00E-04 | 1.00E-04 | 1.00E-04 |
| Ttur_Wil_B046 | 0.987125 | 0.012575 | 1.00E-04 | 1.00E-04 | 1.00E-04 |
| Ttur_Wil_B047 | 0.985658 | 0.014042 | 1.00E-04 | 1.00E-04 | 1.00E-04 |
| Ttur_Wil_B048 | 0.982613 | 0.015308 | 1.00E-04 | 1.00E-04 | 0.001879 |
| Ttur_Wil_B049 | 0.9996   | 1.00E-04 | 1.00E-04 | 1.00E-04 | 1.00E-04 |
| Ttur_Wil_B050 | 0.997515 | 0.001974 | 1.00E-04 | 1.00E-04 | 0.000311 |
| Ttur_Wil_B052 | 0.991286 | 1.00E-04 | 1.00E-04 | 1.00E-04 | 0.008414 |

| Accession      | Q1       | Q2       | Q3       | Q4       | Q5       |
|----------------|----------|----------|----------|----------|----------|
| Tunk_Unk_TW042 | 0.974752 | 0.024948 | 1.00E-04 | 1.00E-04 | 1.00E-04 |
| Tura_Ura_A025  | 0.01797  | 1.00E-04 | 1.00E-04 | 1.00E-04 | 0.98173  |
| Tura_Ura_A062  | 0.00718  | 0.017577 | 1.00E-04 | 1.00E-04 | 0.975043 |
| Tura_Ura_A064  | 1.00E-04 | 1.00E-04 | 1.00E-04 | 1.00E-04 | 0.9996   |
| Tura_Ura_A065  | 1.00E-04 | 1.00E-04 | 1.00E-04 | 1.00E-04 | 0.9996   |
| Tura_Ura_A066  | 0.029411 | 1.00E-04 | 1.00E-04 | 1.00E-04 | 0.970289 |
| Tura_Ura_A067  | 1.00E-04 | 1.00E-04 | 1.00E-04 | 1.00E-04 | 0.9996   |
| Tura_Ura_A068  | 0.00861  | 1.00E-04 | 1.00E-04 | 1.00E-04 | 0.991091 |
| Tura_Ura_A069  | 0.003623 | 0.002717 | 1.00E-04 | 1.00E-04 | 0.99346  |
| Tura_Ura_A070  | 1.00E-04 | 1.00E-04 | 1.00E-04 | 1.00E-04 | 0.9996   |
| Tura_Ura_A071  | 0.004882 | 1.00E-04 | 1.00E-04 | 1.00E-04 | 0.994818 |
| Tura_Ura_A072  | 1.00E-04 | 1.00E-04 | 1.00E-04 | 1.00E-04 | 0.9996   |
| Tura_Ura_A073  | 1.00E-04 | 0.020332 | 1.00E-04 | 1.00E-04 | 0.979369 |
| Tura_Ura_A074  | 1.00E-04 | 0.013597 | 1.00E-04 | 1.00E-04 | 0.986103 |
| Tura_Ura_A076  | 0.024891 | 1.00E-04 | 1.00E-04 | 1.00E-04 | 0.974809 |
| Tura_Ura_A077  | 0.003313 | 0.039628 | 1.00E-04 | 1.00E-04 | 0.956859 |
| Tura_Ura_A078  | 1.00E-04 | 1.00E-04 | 1.00E-04 | 1.00E-04 | 0.9996   |
| Tura_Ura_A079  | 0.027816 | 0.009345 | 1.00E-04 | 1.00E-04 | 0.962639 |
| Tura_Ura_A080  | 1.00E-04 | 1.00E-04 | 1.00E-04 | 1.00E-04 | 0.9996   |
| Tura_Ura_A081  | 1.00E-04 | 1.00E-04 | 1.00E-04 | 1.00E-04 | 0.9996   |
| Tura_Ura_A082  | 0.013127 | 0.017059 | 1.00E-04 | 1.00E-04 | 0.969614 |
| Tura_Ura_A083  | 0.007784 | 0.020157 | 1.00E-04 | 1.00E-04 | 0.97186  |
| Tura_Ura_A085  | 1.00E-04 | 0.009944 | 1.00E-04 | 1.00E-04 | 0.989757 |
| Tura_Ura_A086  | 0.011417 | 1.00E-04 | 1.00E-04 | 1.00E-04 | 0.988283 |
| Tura_Ura_A087  | 0.007305 | 1.00E-04 | 1.00E-04 | 1.00E-04 | 0.992395 |
| Tura_Ura_A088  | 1.00E-04 | 0.026232 | 1.00E-04 | 1.00E-04 | 0.973468 |
| Tura_Ura_A091  | 1.00E-04 | 1.00E-04 | 1.00E-04 | 1.00E-04 | 0.9996   |
| Tura_Wil_A090  | 1.00E-04 | 0.991556 | 1.00E-04 | 1.00E-04 | 0.008144 |
| Tvav_Vav_TW045 | 0.947152 | 0.044647 | 1.00E-04 | 1.00E-04 | 0.008001 |
| Tvav_Vav_TW046 | 0.994552 | 0.005148 | 1.00E-04 | 1.00E-04 | 1.00E-04 |
| Tvav_Vav_TW047 | 0.996771 | 0.002929 | 1.00E-04 | 1.00E-04 | 1.00E-04 |
| Tvav_Vav_TW048 | 0.990972 | 1.00E-04 | 1.00E-04 | 1.00E-04 | 0.008728 |
| Tvav_Vav_TW049 | 0.98434  | 0.01074  | 1.00E-04 | 1.00E-04 | 0.004721 |

Each color represents group of accessions sharing over 50% of their ancestral proportion. Unshaded accessions are those with higher level of admixture harboring less than 50% ancestral proportion of any of the groups.

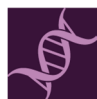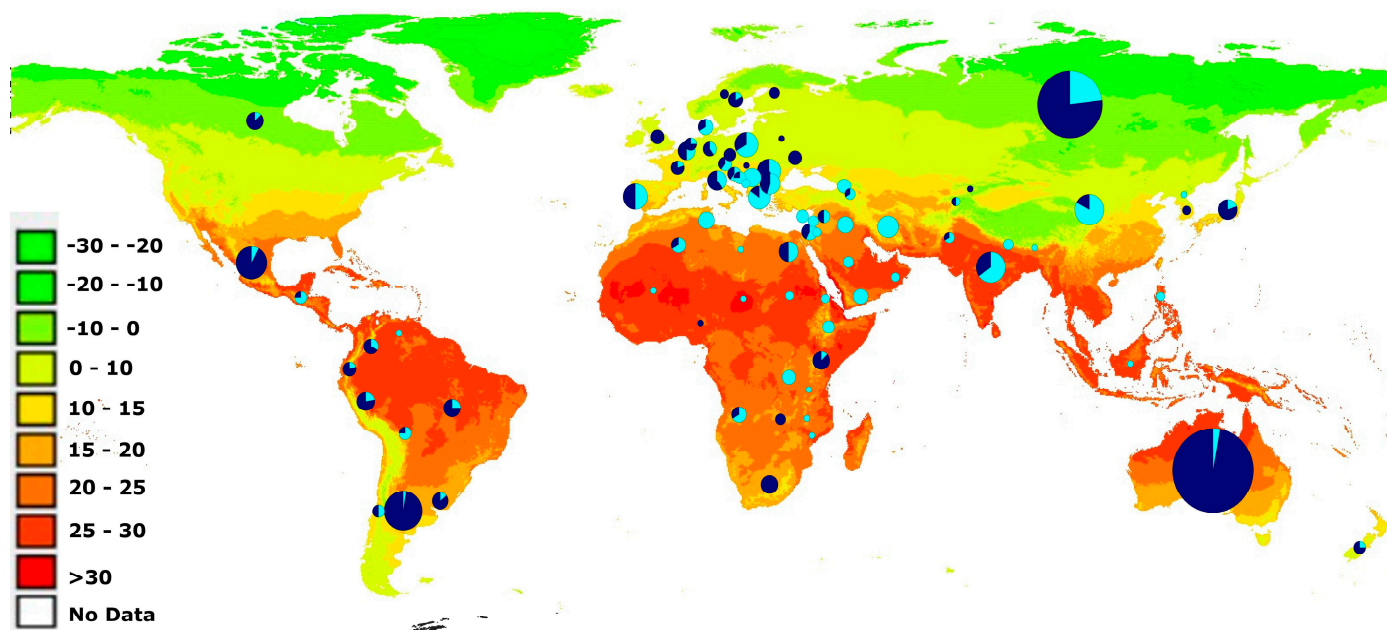

**Figure S3.** Geographic origin of the accessions in exome (113K) dataset mapped against annual temperature (°C) distribution. Pie diagrams show the cultivars in dark blue and the landraces in light blue. The size of the circles is proportional with the number of accessions.
